# Supplementary material for: Scoping review to identify strategies and interventions improving interprofessional collaboration and integration in primary care
Source: PubMed Central journal article supplement — BMJ Open. 2022 Oct 27;12(10):e062111. doi: 10.1136/bmjopen-2022-062111 (PMC9621161; doi:10.1136/bmjopen-2022-062111), 2022-10-27
Supplement: bmjopen-2022-062111.draft_revisions.pdf [file bmjopen-2022-062111.draft_revisions.pdf]

# BMJ Open

BMJ Open is committed to open peer review. As part of this commitment we make the peer review history of every article we publish publicly available.

When an article is published we post the peer reviewers' comments and the authors' responses online. We also post the versions of the paper that were used during peer review. These are the versions that the peer review comments apply to.

The versions of the paper that follow are the versions that were submitted during the peer review process. They are not the versions of record or the final published versions. They should not be cited or distributed as the published version of this manuscript.

BMJ Open is an open access journal and the full, final, typeset and author-corrected version of record of the manuscript is available on our site with no access controls, subscription charges or pay-per-view fees (<http://bmjopen.bmj.com>).

If you have any questions on BMJ Open's open peer review process please email [info.bmjopen@bmj.com](mailto:info.bmjopen@bmj.com)

# BMJ Open

## A scoping review to identify strategies and interventions improving interprofessional collaboration and integration in primary care

|                               |                                                                                                                                                                                                                                                                                                                                                                                                                                                           |
|-------------------------------|-----------------------------------------------------------------------------------------------------------------------------------------------------------------------------------------------------------------------------------------------------------------------------------------------------------------------------------------------------------------------------------------------------------------------------------------------------------|
| Journal:                      | <i>BMJ Open</i>                                                                                                                                                                                                                                                                                                                                                                                                                                           |
| Manuscript ID                 | bmjopen-2022-062111                                                                                                                                                                                                                                                                                                                                                                                                                                       |
| Article Type:                 | Original research                                                                                                                                                                                                                                                                                                                                                                                                                                         |
| Date Submitted by the Author: | 17-Feb-2022                                                                                                                                                                                                                                                                                                                                                                                                                                               |
| Complete List of Authors:     | Sirimsi, Muhammed Mustafa; University of Antwerp, Center for General Practice<br>De Loof, Hans; University of Antwerp, Pharmaceutical sciences<br>Van den Broeck, Kris; University of Antwerp, Department of General Practice<br>De Vlieghe, Kristel; Wit-Gele Kruis van Vlaanderen<br>Pype, Peter; Univ Ghent,<br>Remmen, Roy; University of Antwerp, Primary and interdisciplinary care<br>van Bogaert, Peter; Universiteit Antwerpen Campus Drie Eiken |
| Keywords:                     | PRIMARY CARE, Organisation of health services < HEALTH SERVICES ADMINISTRATION & MANAGEMENT, PUBLIC HEALTH, Protocols & guidelines < HEALTH SERVICES ADMINISTRATION & MANAGEMENT, Quality in health care < HEALTH SERVICES ADMINISTRATION & MANAGEMENT                                                                                                                                                                                                    |
|                               |                                                                                                                                                                                                                                                                                                                                                                                                                                                           |

SCHOLARONE™  
Manuscripts

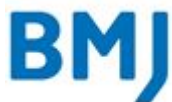

I, the Submitting Author has the right to grant and does grant on behalf of all authors of the Work (as defined in the below author licence), an exclusive licence and/or a non-exclusive licence for contributions from authors who are: i) UK Crown employees; ii) where BMJ has agreed a CC-BY licence shall apply, and/or iii) in accordance with the terms applicable for US Federal Government officers or employees acting as part of their official duties; on a worldwide, perpetual, irrevocable, royalty-free basis to BMJ Publishing Group Ltd ("BMJ") its licensees and where the relevant Journal is co-owned by BMJ to the co-owners of the Journal, to publish the Work in this journal and any other BMJ products and to exploit all rights, as set out in our [licence](#).

The Submitting Author accepts and understands that any supply made under these terms is made by BMJ to the Submitting Author unless you are acting as an employee on behalf of your employer or a postgraduate student of an affiliated institution which is paying any applicable article publishing charge ("APC") for Open Access articles. Where the Submitting Author wishes to make the Work available on an Open Access basis (and intends to pay the relevant APC), the terms of reuse of such Open Access shall be governed by a Creative Commons licence – details of these licences and which [Creative Commons](#) licence will apply to this Work are set out in our licence referred to above.

Other than as permitted in any relevant BMJ Author's Self Archiving Policies, I confirm this Work has not been accepted for publication elsewhere, is not being considered for publication elsewhere and does not duplicate material already published. I confirm all authors consent to publication of this Work and authorise the granting of this licence.

Title: A scoping review to identify strategies and interventions improving interprofessional collaboration and integration in primary care

Authors: Muhammed Mustafa Sirimsi<sup>1,2</sup>, Hans De Loof<sup>3</sup>, Kris Van Den Broeck<sup>2</sup>, Kristel De Vlieghe<sup>4</sup>, Peter Pype<sup>5,6</sup>, Roy Remmen<sup>2</sup>, Peter Van Bogaert<sup>1</sup>

*Affiliations:*

<sup>1</sup>Centre for research and innovation in care (CRIC), Faculty of Medicine and Health Sciences. University of Antwerp. Antwerp. Belgium

<sup>2</sup>Family Medicine and Population Health (FAMPOP), Faculty of Medicine and Health Sciences. University of Antwerp. Antwerp. Belgium

<sup>3</sup>Laboratory of Physiopharmacology, Faculty of pharmaceutical sciences, University of Antwerp, Antwerp, Belgium

<sup>4</sup>White-Yellow Cross of Flanders, Brussels, Belgium

<sup>5</sup>Center for family medicine, Department of Public Health and Primary Care, Faculty of Medicine and Health Sciences, Ghent University, Ghent, Belgium

<sup>6</sup>End-of-Life Care Research Group, Vrije Universiteit Brussel and Ghent University, Ghent, Belgium

*Corresponding author: Muhammed Mustafa Sirimsi*

*E-mail authors:* [muhammedmustafa.sirimsi@uantwerpen.be](mailto:muhammedmustafa.sirimsi@uantwerpen.be); [Hans.deloo@uantwerpen.be](mailto:Hans.deloo@uantwerpen.be); [Kris.vandenbroeck@uantwerpen.be](mailto:Kris.vandenbroeck@uantwerpen.be); [Kristel.de.vlieghe@vlaanderen.wgk.be](mailto:Kristel.de.vlieghe@vlaanderen.wgk.be); [peter.pype@ugent.be](mailto:peter.pype@ugent.be); [roy.remmen@uantwerpen.be](mailto:roy.remmen@uantwerpen.be); [peter.vanbogaert@uantwerpen.be](mailto:peter.vanbogaert@uantwerpen.be)

## Abstract

**Objective:** To identify strategies and interventions used to improve interprofessional collaboration and integration in primary care.

**Design:** Scoping review

**Data Sources:** Specific Medical Subject Headings (MeSH-terms) were used, and a search strategy was developed for Pubmed and afterwards adapted to Medline, Eric, and Web of Science.

**Study selection:** In the first stage of the selection, two researchers screened the article abstracts to select eligible papers. When decisions conflicted, three other researchers joined the decision-making process. Same strategy was used with full-text screening. Articles were included if they: (i) were in English, (ii) described an intervention to improve interprofessional collaboration or integration (IPCI) in primary care involving at least two different healthcare disciplines, (iii) originated from a high-income country, (iv) were peer-reviewed; and (v) were published between 2001 and 2020.

**Data extraction and synthesis:** From each paper, eligible data were extracted, and the selected papers were analysed inductively. Studying the main focus of the papers, researchers searched for common patterns answering the research question and exposing research gaps. The identified themes, were discussed and adjusted until consensus was reached among all authors.

**Results:** The literature search yielded a total of 1816 papers. After removing duplicates, screening titles, and abstracts, and performing full-text readings, 34 papers were incorporated in this scoping review. The identified strategies and interventions were inductively categorized under five main themes; (i) Acceptance and team readiness towards collaboration, (ii) acting as a team and not as an individual; (iii) communication strategies and shared decision making, (iv) coordination in primary care, and (v) integration of caregivers and their skills and competences.

**Conclusions:** We identified a mix of strategies and interventions that can function as 'building blocks', for the development of a generic intervention to improve collaboration in different types of primary care settings and organisations.

### Strengths and limitations of this study

- The review focuses exclusively on primary care; thus, our findings are not directly transferable to other healthcare levels.
- Only studies performed in high-income countries were included in this review; hence, our findings are not directly transferable to other countries because differences in health systems, financing, governance, title protection and culture can pose significant implementation challenges.
- The risk of bias to the interpretation of the data was minimised by triangulating researchers from different backgrounds (e.g. nurses, pharmacists and a psychologist) through the whole review process and conducting the selection of articles with a team of at least two researchers.
- We did not limit the search to the collaboration between specific types of caregivers, or in relation to a specific disease, or condition of patients. Therefore, our data and analysis can be used in the context of or added to a broad scope of interprofessional collaboration and integration in primary care.

## Introduction

As the world population is ageing, the growing complexity of health care and health needs, together with the associated financial challenges<sup>[1]</sup> and the fragmentation of primary care,<sup>[2-4]</sup> are prompting a fundamental rethink of how primary care should be organised and how professionals in different settings should collaborate.<sup>[5]</sup> As approximately one-third of the world population lives with a chronic disease,<sup>[6]</sup> and as primary care is usually the first point of access to the care system, integrated care at that level in which professionals closely collaborate, both interdisciplinary and interprofessional, is unquestionably important in current and future care organisations.

Interprofessional collaboration can be beneficial to achieve a more integrated primary health care and should overcome the aforementioned challenges and problems. According to the World Health Organisation, interprofessional collaboration occurs when two or more professions work together to achieve common goals.<sup>[7]</sup> Orchard et al.<sup>[8]</sup> defines it as involving a partnership between a team of health professionals and a client in a participatory, collaborative and coordinated approach to shared decision-making around health and social issues. Goodwin et al.<sup>[9]</sup> and Lewis et al.<sup>[10]</sup> see an efficient interprofessional collaboration as a prerequisite for integrated care. To achieve and maintain interprofessional collaboration in

1  
2  
3 primary care, Bardet et al.<sup>[11]</sup> identified the following five key elements: (i) trust, (ii)  
4 interdependence, (iii) perceptions and (iv) expectations from the other health care  
5 professionals, their skills, their interest for collaborative practice, their role definition and  
6 their communication.<sup>[12-18]</sup> These key elements match with the five dimensions of integrated  
7 care described by Valentijn et al.<sup>[19, 20]</sup>  
8  
9

10 Although several literature reviews identified strategies to influence, improve or facilitate  
11 interprofessional collaboration, a thorough analysis of the interventions is lacking. Most  
12 review papers focused on the collaboration of a single type of caregiver or one specific  
13 disease.<sup>[21-30]</sup> Therefore, it is difficult to broaden these findings to primary care and chronic  
14 conditions in general.  
15

16 To fill this gap, we performed a scoping review to identify strategies and interventions  
17 improving and/or facilitating interprofessional collaboration and integration (IPCI) in primary  
18 care. More specifically, we listed and analysed the existing strategies, interventions and their  
19 outcomes, without focussing on a specific profession or disease. Based on the definitions of  
20 interprofessional collaboration<sup>[7, 8]</sup> and integrated care<sup>[9, 10, 19, 20]</sup>, we included papers, thus  
21 outlining strategies and interventions working on micro, meso and macro-level. The included  
22 papers described organisational, relational and processual factors influenced by these  
23 interventions and strategies.  
24  
25

26 This review was conducted as the first phase of a research project to develop an evidence-  
27 based toolkit, guiding health professionals in their transition towards IPCI of different  
28 competencies, skills and roles as well as the role of patients and their needs in primary care.  
29  
30

## 31 **Methods**

32 We conducted a scoping review using the Arksey and O'Malley framework<sup>[31]</sup>: (i) identifying  
33 the research questions, (ii) identifying relevant studies, (iii) selecting studies, (iv) charting the  
34 data and (v) collating, summarising and reporting results. We used the PRISMA-ScR guidelines  
35 and the PRISMA-ScR templates to help conduct the scoping review<sup>[32]</sup>.  
36  
37

### 38 **Step 1: Identifying the research questions**

39 An exploratory literature search was performed preliminarily to identifying the research  
40 question on IPCI in primary care. Based on this literature search, we developed the following  
41 research question: Which strategies and/or interventions improve or facilitate  
42 interprofessional collaboration and integration in primary care? We aimed to search for  
43 articles containing generic strategies and methods used in primary care settings, to facilitate  
44 IPCI in primary care. Five researchers were involved in identifying this research question for  
45 the scoping review.  
46  
47

### 48 **Step 2: Identifying relevant studies: search strategy**

49 We used specific Medical Subject Headings (MeSH-terms) and free text terms to design a  
50 search strategy around the following key concepts: primary care, health care team, integration  
51 and interprofessional collaboration. We combined the keywords and MeSH terms presented  
52 in Table 1 with the Boolean terms 'OR', 'AND' and 'NOT'. The search strategy was developed  
53 for Pubmed and afterwards adapted to Medline, Eric and Web of Science. The search was  
54 performed between March and June 2020.  
55  
56  
57  
58  
59  
60

| MeSh/search terms and combinations for Pubmed                               |                                 |
|-----------------------------------------------------------------------------|---------------------------------|
| 1.                                                                          | primary care                    |
| 2.                                                                          | primary health care             |
| 3.                                                                          | primary health care             |
| 1 or 2 or 3                                                                 | (Title/abstract)                |
| 5.                                                                          | integrative team                |
| 6.                                                                          | integrative teams               |
| 7.                                                                          | collaborative practice          |
| 8.                                                                          | collaborative practices         |
| 9.                                                                          | interdisciplinary team          |
| 10.                                                                         | interdisciplinary teams         |
| 11.                                                                         | multidisciplinary team          |
| 12.                                                                         | multidisciplinary teams         |
| 13.                                                                         | interprofessional team          |
| 14.                                                                         | interprofessional teams         |
| 15.                                                                         | health care team                |
| 16.                                                                         | health care teams               |
| 17.                                                                         | health care team                |
| 18.                                                                         | health care teams               |
| 5 or 6 or 7 or 8 or 9 or 10 or 11 or 12 or 13 or 14 or 15 or 16 or 17 or 18 | (title/abstract)                |
| 20.                                                                         | interprofessional collaboration |
| 21.                                                                         | interprofessional teamwork      |
| 22.                                                                         | interprofessional teamwork      |
| 23.                                                                         | interdisciplinary collaboration |
| 24.                                                                         | interdisciplinary teamwork      |
| 25.                                                                         | interdisciplinary teamwork      |
| 26.                                                                         | multidisciplinary collaboration |
| 20 or 21 or 22 or 23 or 24 or 25 or 26                                      | (All fields)                    |
| 4 AND 19 AND 27                                                             |                                 |

Table 1: keywords and MeSH terms used to identify relevant data.

### Step 3: Study selection

Articles were included if they: (i) were in English, (ii) described an intervention to improve interprofessional collaboration or integration in primary care involving at least two different healthcare disciplines, (iii) originated from a high-income country,<sup>[33]</sup> (iv) were peer-reviewed and (v) were published between 2001 and 2020. Articles were excluded when: (i) the research methods and findings were not thoroughly described, (ii) it concerned opinion papers, (iii) the study focused on a single disease or group of patients/clients and (iv) when the full text was not available.

We used Rayyan<sup>[34]</sup> to collect and organise eligible articles. In the first stage of the selection, MMS and PVB screened the article abstracts to select eligible papers, according to the inclusion and exclusion criteria, and to eliminate the duplicates. When decisions conflicted, three other researchers (HDL, KdV, KVdB) joined the decision-making process; they were blind to the decisions of the first two reviewers, and each screened a third of the conflicting

1  
2  
3 abstracts. In the second stage of the selection, the initial two reviewers read the full texts of  
4 the selected articles. As in the first stage, studies were included or excluded depending on the  
5 agreement of both reviewers. When the decisions of the two reviewers conflicted, the other  
6 researchers joined the decision-making process and a procedure similar to the one outlined  
7 above was followed.  
8  
9

## 10 **2.4. Charting the data**

11 From each paper, eligible data were extracted using a self-developed descriptive template.  
12 The following characteristics were recorded: a full reference citation (author, title, journal and  
13 publication date); the methodology used to conduct the research; a summary of the  
14 intervention or strategy used to facilitate IPCI and the impact on IPCI.  
15  
16

### 17 **Step 5: Collating, summarising and reporting the data**

18 The selected papers were analysed inductively. Studying the main focus of the papers, we  
19 searched for common patterns among them, answering the research question and/or  
20 exposing research gaps. We, thus, identified themes and subthemes, which were discussed  
21 and adjusted until consensus was reached among all authors. Subsequently, all selected  
22 papers were coded using the defined themes. Using a tabular overview and summary of the  
23 selected literature, the iterative analysis and discussion among the authors were facilitated  
24 and allowed the extraction of the interventions and strategies of interest.  
25  
26  
27

### 28 **Patient and public involvement**

29 This scoping review did not directly involve patients or public.  
30  
31

## 32 **Results**

33 The literature search yielded a total of 1,816 papers, of which 445 duplicates were removed  
34 (Figure 1). Upon screening titles and abstracts of the remaining 1,371 records, only 100 were  
35 eligible given the inclusions criteria outlined above. After further reading, 47 studies, lacking  
36 an intervention, were excluded. Finally, 19 more articles were excluded because they did not  
37 include strategies or interventions. This resulted in 34 papers describing strategies and  
38 interventions to facilitate IPCI in primary care. A Flow diagram on the selection procedure is  
39 available in figure 1.  
40  
41  
42

### 43 **Study characteristics**

44 Twenty studies used a qualitative research design, three studies used quantitative designs  
45 and seven studies used mixed-method designs. Additionally, three reviews and one case  
46 study were included. The included studies originated in Australia (n = 3), Canada (n = 14),  
47 USA (n = 5), N. Zealand (n = 4), the Netherlands (n = 4), United Kingdom (n = 2), Ireland (n =  
48 1) and Switzerland (n = 1). Table 2 provides an overview of the characteristics of the papers  
49 included in our review, and table 3 provides an overview of study design and interventions  
50 conducted in the papers.  
51  
52  
53  
54  
55  
56  
57  
58  
59  
60



| Author               | Title                                                                                                                                             | Journal                                                   | Year | Country        |
|----------------------|---------------------------------------------------------------------------------------------------------------------------------------------------|-----------------------------------------------------------|------|----------------|
| Bentley et al        | Interprofessional teamwork in comprehensive primary healthcare services: findings from a mixed methods study                                      | Journal of interprofessional care                         | 2017 | Australia      |
| Berkowitz et al      | Case study: Johns Hopkins Community Health Partnership: a model for transformation                                                                | The Journal of Delivery Science and Innovation            | 2016 | USA            |
| Chan et al           | Finding common ground? Evaluating an intervention to improve teamwork among primary health-care professionals                                     | International Journal of Quality in Health Care           | 2010 | Australia      |
| Coleman et al        | Interprofessional ambulatory primary care practice-based educational program                                                                      | Journal of interprofessional care                         | 2008 | USA            |
| Curran et al         | Evaluation of an interprofessional continuing professional development initiative in primary health care                                          | Journal of Continuing Education in the Health Professions | 2007 | Canada         |
| Goldman et al        | Interprofessional primary care protocols: a strategy to promote an evidence-based approach to teamwork and the delivery of care                   | Journal of interprofessional care                         | 2010 | Canada         |
| Grace et al          | Flexible implementation and integration of new team members to support patient-centred care                                                       | The Journal of Delivery Science and Innovation            | 2014 | USA            |
| Hilts et al          | Helping primary care teams emerge through a quality improvement program                                                                           | Oxford Academic: Family Practice                          | 2013 | Canada         |
| Josi et al           | Advanced practice nurses in primary care in Switzerland: an analysis of interprofessional collaboration                                           | BMC Nursing                                               | 2020 | Switzerland    |
| Kim et al            | What makes team communication effective: a qualitative analysis of interprofessional primary care team members' perspectives                      | Journal of interprofessional care                         | 2019 | USA            |
| Kotecha et al        | Influence of a quality improvement collaborative program on team functioning in primary healthcare                                                | Journal of Collaborative Family Healthcare                | 2015 | Canada         |
| Légaré et al         | Validating a conceptual model for an inter-professional approach to shared decision making: a mixed methods study                                 | Journal of Evaluation in Clinical Practice                | 2020 | Canada         |
| Lockhart et al       | Engaging primary care physicians in care coordination for patients with complex medical conditions                                                | Canadian Family Physician                                 | 2019 | Canada         |
| Macnaughton et al    | Role construction and boundaries in interprofessional primary health care teams: a qualitative study                                              | BMC Health Services Research                              | 2013 | Canada         |
| Mahmood-yousef et al | Interprofessional relationships and communication in primary palliative care: impact of the gold standards framework                              | The British Journal of General Practice                   | 2008 | United Kingdom |
| Morgan 2015          | Observation of interprofessional collaborative practice in primary care teams: an integrative literature review                                   | International Journal of Nursing Studies                  | 2015 | New Zealand    |
| Morgan 2020          | Collaborative care in primary care: the influence of practice interior architecture on informal face-to-face communication—an observational study | Health Environments Research & Design Journal             | 2020 | New Zealand    |
| Murphy et al         | Change in mental health collaborative care attitudes and practice in Australia: impact of participation in MHPN network meetings                  | Journal of Integrated Care                                | 2017 | Australia      |
| Pullon et al         | Observation of interprofessional collaboration in primary care practice: a multiple case study                                                    | Journal of interprofessional care                         | 2016 | New Zealand    |
| Reay et al           | Legitimizing new practices in primary health care                                                                                                 | Health Care Management Review                             | 2013 | Canada         |

|                  |                                                                                                                                                                                       |                                                           |      |                |
|------------------|---------------------------------------------------------------------------------------------------------------------------------------------------------------------------------------|-----------------------------------------------------------|------|----------------|
| Reeves et al     | Interprofessional collaboration to improve professional practice and healthcare outcomes                                                                                              | Cochrane review                                           | 2017 | Canada         |
| Robben et al     | Impact of interprofessional education on collaboration attitudes, skills, and behaviour among primary care professionals                                                              | Journal of continuing education in the health professions | 2012 | Netherlands    |
| Rodriquez 2010   | The implementation evaluation of primary care groups of practice: a focus on organizational identity                                                                                  | Bmc family practice                                       | 2010 | Canada         |
| Rodriquez 2015   | Availability of primary care team members can improve teamwork and readiness for change                                                                                               | Health care management review                             | 2015 | USA            |
| Russell et al    | Contextual levers for team-based primary care: lessons from reform interventions in five jurisdictions in three countries                                                             | Health service research                                   | 2018 | Canada         |
| Sargeant et al   | Effective interprofessional teams: “contact is not enough” to build a team                                                                                                            | Journal of continuing education in the health professions | 2008 | Canada         |
| Tierney et al    | Interdisciplinary team working in the irish primary healthcare system: analysis of ‘invisible’ bottom up innovations using normalisation process theory                               | Journal of health policy                                  | 2019 | Ireland        |
| Valaitis et al   | Examining interprofessional teams structures and processes in the implementation of a primary care intervention (health tapestry) for older adults using normalization process theory | Bmc family practice                                       | 2020 | Canada         |
| Van dongen 2018a | Suitability of a programme for improving interprofessional primary care team meetings                                                                                                 | International journal of integrated care                  | 2018 | Netherlands    |
| Van dongen 2016  | Interprofessional collaboration regarding patients’ care plans in primary care: a focus group study into influential factors                                                          | Bmc family practice                                       | 2016 | Netherlands    |
| Van dongen 2018b | Development of a customizable programme for improving interprofessional team meetings: an action research approach                                                                    | International journal of integrated care                  | 2018 | Netherlands    |
| Wener & woodgate | Collaborating in the context of co-location: a grounded theory study                                                                                                                  | Bmc family practice                                       | 2016 | Canada         |
| Wilcock et al    | The dorset seedcorn project: interprofessional learning and continuous quality improvement in primary care                                                                            | British journal of general practice                       | 2002 | United kingdom |
| Young et al      | Shared care requires a shared vision: communities of clinical practice in a primary care setting                                                                                      | Bmc health service research                               | 2017 | New Zealand    |

Table 2: An overview of characteristics of the selected articles.

| Author          | Study design                                                                                                          | Intervention/strategy                                                                                                                                                                                                                 |
|-----------------|-----------------------------------------------------------------------------------------------------------------------|---------------------------------------------------------------------------------------------------------------------------------------------------------------------------------------------------------------------------------------|
| Bentley et al   | Mixed methods study. Online survey, and interviews with managers and practitioners                                    | Introduction of a comprehensive primary healthcare (CPHC) method                                                                                                                                                                      |
| Berkowitz et al | Case study                                                                                                            | The Johns Hopkins Community Health Partnership (J-CHIP). A community-based intervention using multidisciplinary care.                                                                                                                 |
| Chan et al      | Mixed methods study: Qualitative interviews, observations and a survey assessing multidisciplinary teamwork was used. | A 6-month intervention (The Team-link intervention) consisting of an educational workshop and structured facilitation using specially designed materials, backed up by informal telephone support.                                    |
| Coleman et al   | A longitudinal cohort study with a quantitative evaluation.                                                           | STAR-project: an educational program for teams of nurse practitioners, family medicine residents and social work students to work together at clinical sites in the delivery of longitudinal care in primary care ambulatory clinics. |
| Curran et al    | Mixed methods study: An evaluation research design, pre- to poststudy with quantitative and qualitative instruments.  | Introducing The Building a Better Tomorrow Initiative (BBTI), which is a continuing professional development (CPD) program.                                                                                                           |

|    |                      |                                                                                                                                                                                                                                                            |                                                                                                                                                                                                                                                                     |
|----|----------------------|------------------------------------------------------------------------------------------------------------------------------------------------------------------------------------------------------------------------------------------------------------|---------------------------------------------------------------------------------------------------------------------------------------------------------------------------------------------------------------------------------------------------------------------|
| 1  |                      |                                                                                                                                                                                                                                                            |                                                                                                                                                                                                                                                                     |
| 2  |                      |                                                                                                                                                                                                                                                            |                                                                                                                                                                                                                                                                     |
| 3  | Goldman et al        | Qualitative study.                                                                                                                                                                                                                                         | Implementation of an interprofessional protocol                                                                                                                                                                                                                     |
| 4  |                      |                                                                                                                                                                                                                                                            |                                                                                                                                                                                                                                                                     |
| 5  | Grace et al          | Mixed methods: Interviews and a survey with primary care professionals.                                                                                                                                                                                    | Introduction of interprofessional primary care protocols                                                                                                                                                                                                            |
| 6  |                      |                                                                                                                                                                                                                                                            |                                                                                                                                                                                                                                                                     |
| 7  | Hilts et al          | A qualitative exploratory case study approach.                                                                                                                                                                                                             | Introducing a quality improvement program.                                                                                                                                                                                                                          |
| 8  | Josi et al           | Qualitative study with an ethnographic design.                                                                                                                                                                                                             | Integration of an advanced practice nurse in a primary care team.                                                                                                                                                                                                   |
| 9  |                      |                                                                                                                                                                                                                                                            |                                                                                                                                                                                                                                                                     |
| 10 | Kim et al            | Qualitative study. Grounded theory method of constant comparison.                                                                                                                                                                                          | Standardized communication tools used with the implementation of the patient-centred medical home (PCMH)                                                                                                                                                            |
| 11 |                      |                                                                                                                                                                                                                                                            |                                                                                                                                                                                                                                                                     |
| 12 | Kotecha et al        | A qualitative study using a phenomenological approach was conducted as part of a mixed-method evaluation.                                                                                                                                                  | Quality Improvement Learning Collaborative Program to support the development of interdisciplinary team function and improve chronic disease management, disease prevention, and access to care.                                                                    |
| 13 |                      |                                                                                                                                                                                                                                                            |                                                                                                                                                                                                                                                                     |
| 14 | Légaré et al         | Qualitative study. Thematic analysis of the transcripts and a descriptive analysis of the questionnaires was performed.                                                                                                                                    | An interprofessional shared decision-making model.                                                                                                                                                                                                                  |
| 15 |                      |                                                                                                                                                                                                                                                            |                                                                                                                                                                                                                                                                     |
| 16 | Lockhart et al       | Qualitative study. Care professionals interviewed 14 to 19 months after the initiation of an intervention.                                                                                                                                                 | Initiation of the Seamless Care Optimizing the Patient Experience (SCOPE) project.                                                                                                                                                                                  |
| 17 |                      |                                                                                                                                                                                                                                                            |                                                                                                                                                                                                                                                                     |
| 18 | Macnaughton et al    | A qualitative, comparative case study with observations was conducted.                                                                                                                                                                                     | Introduction of a model to explore how roles are constructed within interprofessional health care teams. It focuses on elucidating the different types of role boundaries, the influences on role construction and the implications for professionals and patients. |
| 19 |                      |                                                                                                                                                                                                                                                            |                                                                                                                                                                                                                                                                     |
| 20 | Mahmood-yousef et al | Qualitative interview case study.                                                                                                                                                                                                                          | Adoption of a interprofessional collaboration framework to investigate the extent to which the framework influences interprofessional relationships and communication, and to compare general practitioners' and nurses' experiences.                               |
| 21 |                      |                                                                                                                                                                                                                                                            |                                                                                                                                                                                                                                                                     |
| 22 | Morgan 2015          | Integrative literature review                                                                                                                                                                                                                              | Several strategies to improve interprofessional collaboration in primary care teams                                                                                                                                                                                 |
| 23 |                      |                                                                                                                                                                                                                                                            |                                                                                                                                                                                                                                                                     |
| 24 | Morgan 2020          | Qualitative study with observations                                                                                                                                                                                                                        | Changing architecture of primary care settings to explore the influence of primary care practice interior architecture on face-to-face on-the-fly communication for collaborative care.                                                                             |
| 25 |                      |                                                                                                                                                                                                                                                            |                                                                                                                                                                                                                                                                     |
| 26 | Murphy et al         | Quantitative study: an online survey.                                                                                                                                                                                                                      | Introduction of the Mental Health Professionals Network. Investigating attitudinal and practice changes amongst health professionals after participation in MHPN's network meetings.                                                                                |
| 27 |                      |                                                                                                                                                                                                                                                            |                                                                                                                                                                                                                                                                     |
| 28 | Pullon et al         | Qualitative study, using a case study design with observations.                                                                                                                                                                                            | Identifying existing strategies to maintain and improve interprofessional collaboration in primary care practices.                                                                                                                                                  |
| 29 |                      |                                                                                                                                                                                                                                                            |                                                                                                                                                                                                                                                                     |
| 30 | Reay et al           | A qualitative, longitudinal comparative case study.                                                                                                                                                                                                        | Developing effective interdisciplinary teams in primary health care.                                                                                                                                                                                                |
| 31 |                      |                                                                                                                                                                                                                                                            |                                                                                                                                                                                                                                                                     |
| 32 | Reeves et al         | Systematic review                                                                                                                                                                                                                                          | Nine interventions analysed.                                                                                                                                                                                                                                        |
| 33 |                      |                                                                                                                                                                                                                                                            |                                                                                                                                                                                                                                                                     |
| 34 | Robben et al         | Mixed methods study: Before–after study, using the Interprofessional Attitudes Questionnaire, Attitudes Toward Health Care Teams Scale, and Team Skills Scale. Additionally, semi-structured interviews were conducted                                     | Introduction of an interprofessional education program with interdisciplinary workshops.                                                                                                                                                                            |
| 35 |                      |                                                                                                                                                                                                                                                            |                                                                                                                                                                                                                                                                     |
| 36 | Rodriquez 2010       | Qualitative study. An in-depth longitudinal case study was conducted over two and a half years.                                                                                                                                                            | Implementation of primary care groups of practice, with a focus on the emergence of the organizational identity.                                                                                                                                                    |
| 37 |                      |                                                                                                                                                                                                                                                            |                                                                                                                                                                                                                                                                     |
| 38 | Rodriquez 2015       | Quantitative study with a survey, using path analysis.                                                                                                                                                                                                     | A four-stage developmental interprofessional collaborative relationship-building model: To assess primary care team structure (team size, team member availability, and access to interdisciplinary expertise), teamwork, and readiness for change.                 |
| 39 |                      |                                                                                                                                                                                                                                                            |                                                                                                                                                                                                                                                                     |
| 40 | Russell et al        | An international consortium of researchers met via teleconference and regular face-to-face meetings using a Collaborative Reflexive Deliberative Approach to re-analyse and synthesize their published and unpublished data and their own work experience. | Determining existing strategies and methods to improve interprofessional collaboration and integration in primary care.                                                                                                                                             |
| 41 |                      |                                                                                                                                                                                                                                                            |                                                                                                                                                                                                                                                                     |
| 42 |                      |                                                                                                                                                                                                                                                            |                                                                                                                                                                                                                                                                     |
| 43 |                      |                                                                                                                                                                                                                                                            |                                                                                                                                                                                                                                                                     |
| 44 |                      |                                                                                                                                                                                                                                                            |                                                                                                                                                                                                                                                                     |
| 45 |                      |                                                                                                                                                                                                                                                            |                                                                                                                                                                                                                                                                     |
| 46 |                      |                                                                                                                                                                                                                                                            |                                                                                                                                                                                                                                                                     |
| 47 |                      |                                                                                                                                                                                                                                                            |                                                                                                                                                                                                                                                                     |
| 48 |                      |                                                                                                                                                                                                                                                            |                                                                                                                                                                                                                                                                     |
| 49 |                      |                                                                                                                                                                                                                                                            |                                                                                                                                                                                                                                                                     |
| 50 |                      |                                                                                                                                                                                                                                                            |                                                                                                                                                                                                                                                                     |
| 51 |                      |                                                                                                                                                                                                                                                            |                                                                                                                                                                                                                                                                     |
| 52 |                      |                                                                                                                                                                                                                                                            |                                                                                                                                                                                                                                                                     |
| 53 |                      |                                                                                                                                                                                                                                                            |                                                                                                                                                                                                                                                                     |
| 54 |                      |                                                                                                                                                                                                                                                            |                                                                                                                                                                                                                                                                     |
| 55 |                      |                                                                                                                                                                                                                                                            |                                                                                                                                                                                                                                                                     |
| 56 |                      |                                                                                                                                                                                                                                                            |                                                                                                                                                                                                                                                                     |
| 57 |                      |                                                                                                                                                                                                                                                            |                                                                                                                                                                                                                                                                     |
| 58 |                      |                                                                                                                                                                                                                                                            |                                                                                                                                                                                                                                                                     |
| 59 |                      |                                                                                                                                                                                                                                                            |                                                                                                                                                                                                                                                                     |
| 60 |                      |                                                                                                                                                                                                                                                            |                                                                                                                                                                                                                                                                     |

|                  |                                                                                                                                                                                          |                                                                                                                                                                                                                                                                                     |
|------------------|------------------------------------------------------------------------------------------------------------------------------------------------------------------------------------------|-------------------------------------------------------------------------------------------------------------------------------------------------------------------------------------------------------------------------------------------------------------------------------------|
| Sargeant et al   | Qualitative, grounded theory study.                                                                                                                                                      | Introducing an interprofessional educational program.                                                                                                                                                                                                                               |
| Tierney et al    | Mixed methods study: An online survey and an interview study.                                                                                                                            | Bottom up innovations using Normalisation Process Theory: (1)Design and delivery of educational events in the community for preventive care and health promotion. (2)Development of integrated care plans for people with complex health needs. (3) Advocacy on behalf of patients. |
| Valaitis et al   | Qualitative study. This study applied Normalization Process Theory (NPT) and used a descriptive qualitative approach embedded in a mixed-methods, pragmatic randomized controlled trial. | Strengthening Quality [Health TAPESTRY] is a primary care intervention aimed at supporting older adults that involves trained volunteers, interprofessional teams, technology, and system navigation.                                                                               |
| Van dongen 2018a | Mixed methods study: a process evaluation using a mixed-methods approach including both qualitative and quantitative data.                                                               | Introducing a multifaceted programme including a reflection framework, training activities and a toolbox.                                                                                                                                                                           |
| Van dongen 2016  | Qualitative study with an inductive content analysis.                                                                                                                                    | Improving interprofessional collaboration by using patients' care plans.                                                                                                                                                                                                            |
| Van dongen 2018b | Qualitative study with an action research approach.                                                                                                                                      | A Customizable Programme for Improving Interprofessional Team Meetings                                                                                                                                                                                                              |
| Wener & woodgate | A qualitative research paradigm where the exploration is grounded in the providers' experiences.                                                                                         | A four-stage developmental interprofessional collaborative relationship-building model to guide health care providers and leaders as they integrate mental health services into primary care settings.                                                                              |
| Wilcock et al    | Mixed methods study. Participants kept reflective journals. Evaluation was undertaken using a mix of questionnaires and staff interviews.                                                | The Dorset Seedcorn Project: interprofessional learning and continuous quality improvement in primary care. Implementing the principles and methods of continuous quality improvement.                                                                                              |
| Young et al      | Qualitative study with observations. A focused ethnography of nine 'Communities of Clinical Practice.                                                                                    | Introducing the 'Community of Clinical Practice' (CoCP) model. Forming a vision of care which is shared by patients and the primary care professionals involved in their care.                                                                                                      |

Table 3: An overview of study design and interventions incorporated in the selected articles.

## Findings

Five main themes, essential for IPCI, emerged from our analyses: (i) Acceptance and team readiness towards collaboration (n=21), (ii) acting as a team and not as an individual (n=26); (iii) communication strategies and shared decision making (n=16), (iv) coordination in primary care (n=20), and (v) integration of caregivers and their skills and competences (n=16). An overview of the interventions is presented in Table 3, while an overview of the articles sorted in themes is presented in Table 4.

| Articles                         | Acceptance and team readiness towards collaboration | Acting as a team and not as an individual | Communication strategies and shared decision making | Coordination in primary care | Integration of caregivers and their skills and competences |
|----------------------------------|-----------------------------------------------------|-------------------------------------------|-----------------------------------------------------|------------------------------|------------------------------------------------------------|
| Bentley et al. <sup>[35]</sup>   |                                                     | X                                         | X                                                   | X                            |                                                            |
| Berkowitz et al. <sup>[36]</sup> |                                                     |                                           |                                                     | X                            |                                                            |
| Chan et al. <sup>[37]</sup>      | X                                                   | X                                         |                                                     | X                            |                                                            |
| Coleman et al. <sup>[38]</sup>   | X                                                   |                                           | X                                                   | X                            |                                                            |
| Curran et al. <sup>[39]</sup>    | X                                                   | X                                         | X                                                   | X                            | X                                                          |
| Goldman et al. <sup>[40]</sup>   | X                                                   | X                                         | X                                                   |                              | X                                                          |
| Grace et al. <sup>[41]</sup>     | X                                                   | X                                         | X                                                   |                              | X                                                          |
| Hilts et al. <sup>[42]</sup>     | X                                                   | X                                         |                                                     |                              | X                                                          |
| Josi et al. <sup>[43]</sup>      |                                                     | X                                         | X                                                   |                              | X                                                          |
| Kim et al. <sup>[44]</sup>       | X                                                   |                                           | X                                                   | X                            |                                                            |

|                                       |           |           |           |           |           |
|---------------------------------------|-----------|-----------|-----------|-----------|-----------|
| Kotecha et al. <sup>[45]</sup>        |           | X         | X         | X         |           |
| Légaré et al. <sup>[46]</sup>         | X         | X         | X         |           | X         |
| Lockhart et al. <sup>[47]</sup>       |           | X         |           | X         |           |
| MacNaughton et al. <sup>[48]</sup>    |           | X         |           | X         | X         |
| Mahmood-Yousef et al. <sup>[49]</sup> | X         |           | X         | X         |           |
| Morgan 2015 <sup>[50]</sup>           | X         | X         | X         |           |           |
| Morgan 2020 <sup>[51]</sup>           |           |           |           | X         |           |
| Murphy et al. <sup>[52]</sup>         | X         |           |           | X         | X         |
| Pullon et al. <sup>[53]</sup>         |           | X         |           | X         |           |
| Reay et al. <sup>[54]</sup>           | X         | X         |           | X         |           |
| Reeves et al. <sup>[55]</sup>         |           |           | X         | X         |           |
| Robben et al. <sup>[56]</sup>         |           | X         |           |           |           |
| Rodriquez 2010. <sup>[57]</sup>       |           |           |           |           | X         |
| Rodriquez 2015 <sup>[58]</sup>        | X         | X         |           | X         |           |
| Russell et al. <sup>[59]</sup>        | X         | X         |           |           | X         |
| Sargeant et al. <sup>[60]</sup>       | X         | X         |           | X         | X         |
| Tierney et al. <sup>[61]</sup>        | X         | x         | X         |           | X         |
| Valaitis et al. <sup>[62]</sup>       |           | X         |           | X         | X         |
| Van Dongen 2018a <sup>[63]</sup>      | X         | X         | X         | X         | X         |
| Van Dongen 2018b <sup>[64]</sup>      | X         | X         | X         |           | X         |
| Van Dongen 2016 <sup>[65]</sup>       |           | X         |           |           |           |
| Wener & Woodgate <sup>[66]</sup>      | X         | X         |           | X         | X         |
| Wilcock et al. <sup>[67]</sup>        | X         | X         |           |           |           |
| Young et al. <sup>[68]</sup>          | X         | X         | X         |           |           |
| # Articles                            | <b>21</b> | <b>26</b> | <b>16</b> | <b>20</b> | <b>16</b> |

Table 4: Articles sorted in themes (X= paper included under that theme)

*Theme 1: Acceptance and team readiness towards collaboration*

Twenty-one articles provided strategies to improve the acceptance and team readiness towards collaboration.<sup>[37-42, 44, 46, 49, 50, 52, 54, 58-61, 63, 64, 66-68]</sup> Before being able to collaborate, caregivers need to accept working as a team. Team readiness towards collaboration occurs when team members obtain the right mindset to take necessary measures for efficient collaboration. This does not mean that an efficient collaboration has been reached, but both acceptance and team readiness were a prerequisite to achieving it. Acceptance and team readiness of caregivers towards collaboration were strongly influenced by their attitude, awareness, knowledge and understanding, and caregiver satisfaction.

Interventions on changing caregivers' attitudes towards collaboration seem to facilitate teamwork.<sup>[69]</sup> Workshops and information sessions were organised to make changes in caregivers' attitudes, in which advantages of teamwork and finding common ground were explained and lectured.<sup>[38, 46, 58, 59, 63, 64, 66, 68]</sup> Basic knowledge about the potential of teamwork was learned using logical explanations.<sup>[36, 38, 46, 58, 59, 63, 64, 66, 68]</sup> Caregivers to whom the advantages of collaboration were explained were more likely to accept and adopt the principles of interprofessional collaboration. Simple and accessible knowledge transfer seems to be an important characteristic of a successful intervention on the attitude and knowledge of caregivers.<sup>[37, 49, 60, 63, 64]</sup>

Some articles<sup>[38, 40, 44, 52, 63, 68]</sup> reported on strategies to increase awareness about collaboration in primary care. Increased awareness resulted in a better acceptance and team readiness towards collaboration. Making caregivers aware of their shortcomings and the

1  
2  
3 need for collaboration with different disciplines seemed an effective way to facilitate  
4 interprofessional collaboration. In addition to awareness, potential improvements in care  
5 quality<sup>[38, 41, 67]</sup>, caused by better collaboration, motivate caregivers to change their attitude.  
6 Furthermore, some studies<sup>[39, 42, 50, 54, 61, 66, 67]</sup> reported that increased caregiver satisfaction  
7 was considered as a facilitator of collaboration between caregivers.  
8  
9

### 10 *Theme 2: Acting as a team and not as an individual*

11  
12 Twenty-six articles provided strategies to act as a team and not as an individual.<sup>[35, 37, 39-43, 45-  
13 48, 50, 53, 54, 56, 58-68]</sup> In some articles<sup>[54, 58, 60, 66, 67]</sup>, this was mentioned as collaborative  
14 behaviour, which was considered to be a facilitator of teamwork. Moreover, showing mutual  
15 respect and trust<sup>[45, 46, 48, 58, 63, 64, 66-68]</sup> between caregivers were important facilitators towards  
16 collaboration: it improves acting as a team, and it supports a safe team climate. Increasing  
17 safety was used to improve collaborative behaviour, and in some cases, it replaced working  
18 in silos into working as a team.<sup>[39, 42, 47, 53, 65, 67]</sup>  
19  
20

21 Developing and enhancing a shared vision, shared values and shared goals were mentioned  
22 as facilitators towards interprofessional collaboration.<sup>[35, 37, 41, 46, 66, 68]</sup> This was achieved by a  
23 structural inclusion of every team member in the development of the teams' vision, values  
24 and goals.<sup>[68]</sup> By simply writing down these principles, caregivers were more likely to  
25 participate in developing shared principles.<sup>[37, 41]</sup> Although the development process was not  
26 explained in detail, three articles mentioned that once developed, shared vision, goals and  
27 values were crucial to maintaining a beneficial collaboration.<sup>[46, 66, 68]</sup> To establish these  
28 shared principles, a patient-centred focus may be an important asset. By prioritising the  
29 patient's needs and preferences, caregivers can find common ground more easily.<sup>[43, 61-64, 68]</sup>  
30  
31

32 Leadership seems of utmost importance to act as a team. Strategies towards collaborative  
33 leadership and shared leadership were mentioned in the articles,<sup>[35, 40, 43, 45, 48, 56, 59, 63, 65]</sup> and  
34 leaders and decision makers should be aware of the potential effects of policy and structural  
35 changes on interprofessional teamwork. By using a clear role assignment, caregivers can  
36 prevent issues in their collaboration.<sup>[50, 63, 66, 68]</sup> However, in one case,<sup>[42]</sup> a rotational  
37 leadership was implemented and suggested, in which there was no permanent leader.  
38  
39

40 One paper emphasised that awareness of potential unintended negative effects of changes  
41 on the functioning of interprofessional teams should be taken into account by decision  
42 makers.<sup>[43]</sup>  
43  
44

### 45 *Theme 3: Communication strategies and shared decision-making*

46  
47 Sixteen articles provided communication strategies and strategies to facilitate shared  
48 decision-making, to improve interprofessional collaboration in primary care.<sup>[35, 38-41, 43-46, 49, 50,  
49 55, 61, 63, 64, 68]</sup> These strategies can be further delineated into the following subthemes: (i)  
50 knowledge about each other,<sup>[41, 61, 63]</sup> (ii) formal and informal meetings,<sup>[35, 39, 43, 50, 55, 63, 64]</sup> (iii)  
51 the use of structured guidelines and protocols,<sup>[40, 41, 61, 64]</sup> (iv) conflict resolution<sup>[38, 43, 49, 63, 64,  
52 68]</sup> and (v) relational equality.<sup>[44-46, 68]</sup>  
53  
54

55 Knowing each other's professional roles and tasks seems a precondition for teamwork.  
56 However, knowing more about each other's family situation, interests and hobbies was also  
57 mentioned to be important to improve the communication and collaboration between  
58 caregivers.<sup>[41, 61, 63]</sup>  
59  
60

1  
2  
3 Both formal<sup>[39, 43, 55, 63, 64]</sup> and informal<sup>[35, 50, 64]</sup> team meetings, mainly happening between  
4 caregivers working in the same practice (under one roof),<sup>[50]</sup> were considered as an  
5 important communication strategy. Formal meetings were mostly used to share information  
6 about patients or clients, distribute tasks and identify and solve problems in the  
7 organisation. Planning and structuring a team meeting can increase the efficiency and  
8 productivity of these meetings.<sup>[39, 43, 55, 63, 64]</sup> Informal meetings were important to know  
9 more about each other and facilitated the trust relations between caregivers. Information  
10 that could not be shared in the formal meetings often appeared in the informal meetings.  
11 Even lunches with team members were used as a communication strategy.<sup>[35, 50, 64]</sup>

12  
13  
14  
15 Structured guidelines, standardised tools and protocols were used to improve the  
16 communication and coordination between caregivers working in primary care. These  
17 protocols provided more effective communication and the provision of an evidence-based  
18 approach towards collaboration and care delivery. Besides using protocols, workshops were  
19 organised to improve communication.<sup>[40, 41, 61, 64]</sup>

20  
21 Making decisions as a team was an indicator of good and effective communication. Shared  
22 decision-making was mentioned in nine studies,<sup>[38, 43-46, 49, 63, 64, 68]</sup> and our analysis identified  
23 conflict resolution<sup>[38, 43, 49, 63, 64, 68]</sup> and relational equality<sup>[44-46, 68]</sup> as key factors to improve  
24 shared decision-making.

#### 25 26 27 *Theme 4: Coordination in primary care*

28  
29 By collaborating with different disciplines and professions, many caregivers were  
30 experiencing problems regarding information sharing<sup>[36, 37, 44, 45, 53, 54, 60, 62, 63, 66]</sup> and  
31 referring<sup>[35, 36, 38, 39, 44, 45, 49, 58, 63, 66]</sup> between primary health care workers. Twenty articles,  
32 therefore, provided strategies to improve coordination in order to ameliorate information  
33 sharing between caregivers, to facilitate referrals for the patient and to guarantee the  
34 continuity of care.<sup>[35-39, 44, 45, 47-49, 51-56, 58, 62, 63, 66]</sup> Accordingly, reciprocity and reciprocal  
35 interdependence were shown to play a crucial role in the coordination of primary care.<sup>[58, 66]</sup>

36  
37  
38 Co-location and the importance of architecture and building characteristics were, in some  
39 cases, mentioned as influential factors for collaboration.<sup>[48, 51, 55]</sup> By optimising the  
40 architecture and working under one roof, brief face-to-face interactions may increase. The  
41 architecture could be optimised by having shared spaces, thus leading to increased staff  
42 proximity or visibility. Especially informal communication was positively affected by the  
43 presence of convenient circulatory and transitional spaces.<sup>[48, 51, 55]</sup> Additionally, weekly or  
44 monthly face-to-face meetings were organised to coordinate care. Face-to-face meetings  
45 and electronic task queues facilitate information sharing and efficient care coordination for  
46 complex patients.<sup>[51, 55]</sup>

#### 47 48 49 *Theme 5: Integration of caregivers and their skills and competences*

50  
51 Fifteen papers provided strategies to improve the integration of caregivers and their skills  
52 and competences in primary care practices<sup>[39-43, 46, 48, 52, 57, 59-64, 66]</sup> and tried to get the most  
53 out of every team member's presence.

54  
55  
56 For new team members, a successful integration was facilitated by welcoming the  
57 newcomers and making them know and understand the vision of the practice. Inclusion of  
58 the caregiver required additional proactive efforts regarding communication and  
59



1  
2  
3 coordination among practice members.<sup>[41, 66]</sup> In some cases, a personal, one-to-one meeting  
4 with the new team member could facilitate problem-solving.<sup>[41]</sup>  
5

6 Eleven papers presented an improved integration of caregivers skills and competences, as a  
7 facilitator for task distribution and role clarification.<sup>[39, 40, 42, 43, 46, 48, 59, 62-64, 66]</sup> Knowing each  
8 other's capabilities, including skills and competences, was very important in this regard.<sup>[40, 42,  
9 48, 66]</sup> Additionally, making sure that caregivers not only know each other's skills and  
10 competences but also enable more transparency about their daily needs and preferences  
11 were mentioned as facilitators.<sup>[42, 48, 59, 63, 66]</sup> Six articles presented strategies to optimise the  
12 use of team members' skills and competences. By acknowledging and affirming their  
13 capabilities, integration of skills and competences was facilitated.<sup>[46, 52, 57, 61, 63, 66]</sup>  
14  
15

16 In one article, researchers indicated that the organisation of team communication-training  
17 workshops and implementation of flexible protocols gave practice stakeholders significant  
18 discretion to integrate new care team roles to best fit local needs. Furthermore, it improved  
19 team communication and functioning because of increased engagement and local leadership  
20 facilitation.<sup>[41]</sup>  
21  
22

## 23 Discussion

24 This scoping review identified five themes for interventions and strategies aimed at  
25 improving and facilitating IPCI in primary care. The first category, which incorporates  
26 acceptance, and team readiness, was a precondition for enhancing and maintaining efficient  
27 interprofessional collaboration. Accepting to collaborate requires a change of attitude,  
28 which involves valuing team members and actively soliciting the opinions or receiving  
29 feedback from other team members.<sup>[70]</sup> An major barrier to adopting a suitable attitude  
30 towards collaboration is the difficulty and complexity of sharing responsibility for patient  
31 care within a team.<sup>[71, 72]</sup> Making caregivers aware of their shortcomings and the need for  
32 collaboration with different disciplines are effective ways to facilitate interprofessional  
33 collaboration.<sup>[38, 40, 44, 52, 63, 68]</sup> In addition, Liedvogel et al.<sup>[73]</sup> demonstrates that experiencing  
34 teamwork itself increases the awareness of the advantages, and the importance of  
35 collaboration, as well as gives caregivers opportunities to demonstrate their skills and  
36 capabilities. In the broader community, increased awareness of the importance of  
37 interprofessional collaboration can lead to an improved experience and understanding of  
38 the totality of healthcare services.<sup>[74]</sup> Furthermore, according to Lockwood and Maguire et  
39 al.,<sup>[75]</sup> it can also help to reduce the sense of isolation experienced by solo medical  
40 practitioners.  
41  
42

43 Second, collaborative behaviour has been described as a facilitator of teamwork.<sup>[54, 58, 60, 66,  
44 67]</sup> To enhance and maintain a collaborative behaviour, the development of shared principles  
45 (such as shared vision, values and goals) is an important prerequisite.<sup>[35, 37, 41, 46, 66, 68]</sup> Our  
46 review revealed that maintaining a safe team climate in which care professionals feel  
47 comfortable is important to act as a team and not as an individual.<sup>[39, 42, 47, 53, 65, 67]</sup> Although  
48 psychological safety is not often mentioned in primary care research,<sup>[17]</sup> Edmondson et al.<sup>[76]</sup>  
49 and Kim et al.<sup>[77]</sup> have indicated the essential role of a safe workplace environment in  
50 enhancing teamwork. Team psychological safety is defined as a shared value; the team is  
51 safe for interpersonal risk taking.<sup>[78]</sup> This means that team members feel they will not be  
52 punished or humiliated for speaking up with ideas, questions, concerns or mistakes. A team  
53 may not be able to collaborate properly if there is a lack of psychological safety; hence, it is  
54  
55  
56  
57  
58  
59  
60



1  
2  
3 assumed that psychological safety is a necessary but insufficient condition for increasing  
4 interprofessional collaboration and workplace effectiveness.<sup>[79]</sup>  
5

6 Third, structured guidelines and protocols seem to be beneficial for communication between  
7 care professionals, thereby impacting IPCI. Team meetings, especially formal meetings can  
8 be held more efficiently by using protocols, that have positive effects on hierarchy and  
9 conflicts resolution between team members.<sup>[80]</sup> The shared decision-making model has been  
10 put forward as a guide for discussing and making decisions in the most effective way.<sup>[81]</sup> This  
11 model includes three principles: recognizing and acknowledging that a decision is required,  
12 knowing and understanding the best available evidence, and incorporating the patient's  
13 values and preferences into the decision.<sup>[82]</sup>  
14

15 Fourth, as an element of interprofessional collaboration and integration, care coordination is  
16 of utmost importance for patient safety. The situation-background-assessment-  
17 recommendation protocol is an existing method to perform information sharing efficiently  
18 and appropriately.<sup>[83]</sup> In addition, Lo et al.<sup>[84]</sup> suggest that the protocol may be a cost-  
19 effective method for coordinating between general practitioners and nurses.<sup>[84]</sup>  
20  
21

22 Finally, optimal integration of caregivers skills and competences has been associated with  
23 maximalising every team member's presence and shortening the adaptation process of new  
24 team members.<sup>[85]</sup> Family caregivers provide a significant portion of health and support  
25 services to individuals with serious illnesses; however, existing literature and health care  
26 systems have often overlooked them and mostly focused on integrating care  
27 professionals.<sup>[86, 87]</sup> Friedman et al.<sup>[86]</sup> suggest using a framework, in which the family  
28 caregiver is an indispensable partner of care professionals and patients.  
29  
30

31 Although all interventions or strategies are useful to a certain point, none is suitable to be  
32 used in isolation as a unique solution for IPCI in primary care. However, a mix of the  
33 interventions and strategies compiled in this scoping review may be capable of doing so. The  
34 consistency, design, and order of this mix of interventions and strategies cannot be specified  
35 based on the results of this scoping review.  
36  
37

38 This scoping review has several limitations. The review focuses exclusively on primary care;  
39 thus, our findings are not directly transferable to other healthcare levels. Only studies  
40 performed in high-income countries were included in this review; hence, our findings are not  
41 directly transferable to other countries because differences in health systems, financing,  
42 governance, title protection and culture can pose significant implementation challenges. In  
43 addition, by including only English-language articles and avoiding the grey literature, we  
44 might have missed some relevant papers. It is worthwhile to note, that this scoping review  
45 aimed to identify interventions that can improve interprofessional collaboration and  
46 integration in primary care and to list their impact on outcomes related to collaboration and  
47 integration. Our review did not report the effectiveness of interventions regarding health  
48 outcomes.  
49  
50

51 We selected articles based on WHO's<sup>[7]</sup> and Orchard et al.'s<sup>[8]</sup> definition of interprofessional  
52 collaboration. For integrated care, we adopted the definitions of Lewis et al.'s [10] and  
53 Valentijn et al.'s<sup>[20]</sup> definitions, which represent a widely accepted consensus. However,  
54 there are many other definitions of IPCI care that, if adopted, could affect the inclusion or  
55 exclusion of articles.  
56  
57  
58  
59  
60

1  
2  
3 The literature has established that researchers can influence the interpretation of data. This  
4 risk of bias was minimised by triangulating researchers from different backgrounds (e.g.  
5 nurses, pharmacists and a psychologist) through the whole process and conducting the  
6 selection of articles with a team of at least two researchers. This triangulation, intensive  
7 cooperation and inductive process increased the credibility and reduced the risk of bias to  
8 the interpretation of the data based on preconceived understanding and personal opinions.  
9  
10

11 A strength of this review is the fact that we did not limit the search to the collaboration  
12 between specific types of caregivers, or in relation to a specific disease, or condition of  
13 patients. Therefore, our data and analysis can be used in the context of or added to a broad  
14 scope of IPCI in primary care. Furthermore, we performed an inductive analysis within a  
15 multidisciplinary team of researchers, to expand the analysis and to identify generic  
16 strategies and interventions.  
17  
18

## 19 Conclusion

20  
21 This scoping review identified five categories of strategies and interventions to improve or  
22 facilitate IPCI in primary care: (i) acceptance and team readiness towards collaboration, (ii)  
23 acting as a team and not as an individual, (iii) communication strategies and shared decision  
24 making, (iv) coordination in primary care and (v) integration of caregivers and their skills and  
25 competences. We did not identify a single strategy or intervention which is broad or generic  
26 enough to be used in every type of primary care setting.  
27  
28

29 We can conclude that a mix of the identified strategies and interventions, which we  
30 illustrated as 'building blocks', can provide valuable input to develop a generic intervention  
31 to be used in different settings and levels of primary health care.  
32  
33

34  
35  
36 **Funding statement:** This research was funded by fund Daniël De Coninck, King Baudouin Foundation,  
37 Belgium. The funder had no involvement in this study. Grant number: 2019-J5170820-211588  
38

### 39 Contributors:

40  
41 All listed authors meet authorship criteria and no others meeting the criteria have been omitted.  
42 Development of the research question and establishment of the search strategy: MMS, HDL, KdV,  
43 KVdB, and PVB  
44 Database search: MMS and PVB  
45 Record screening: MMS, PVB, HDL, KdV, and KVdB performed abstract and full text screenings  
46 Data analysis: MMS, HDL, KdV, KVdB, and PVB  
47 Discussion construction: MMS, HDL, KdV, KVdB, PP, RR, and PVB  
48 Writing – review & editing: MMS, HDL, KdV, KVdB, PP, RR, and PVB  
49 On behalf of the Primary care academy.  
50  
51  
52

53 **Competing interests:** None declared.

54 **Patient consent for publication:** Not applicable.

55 **Ethics approval:** This study did not involve human participants and did not require ethics approval.

56  
57 **Data availability statement:** Data sharing not applicable as no datasets generated  
58 and/or analysed for this study. All relevant review information is available in supplementary  
59  
60

1  
2  
3 material. No primary data analysed.  
4

### 5 **Acknowledgements:**

6  
7 We are grateful for the partnership with the Primary Care Academy ([www.academie-eerstelijjn.be](http://www.academie-eerstelijjn.be)) and  
8 want to thank the King Baudouin Foundation and Fund Daniel De Coninck for the opportunity they  
9 offer us for conducting research and have impact on the primary care of Flanders, Belgium. The  
10 consortium of the Primary Care Academy consists Lead author: Roy Remmen—  
11 [roy.remmen@uantwerpen.be](mailto:roy.remmen@uantwerpen.be)—Department of Primary Care and Interdisciplinary Care, Faculty of  
12 Medicine and Health Sciences. University of Antwerp. Antwerp. Belgium; Emily Verté—Department of  
13 Primary Care and Interdisciplinary Care, Faculty of Medicine and Health Sciences. University of  
14 Antwerp. Antwerp. Belgium, Department of Family Medicine and Chronic Care, Faculty of Medicine  
15 and Pharmacy. Vrije Universiteit Brussel. Brussel. Belgium; Muhammed Mustafa Sirimsi—Centre for  
16 research and innovation in care, Faculty of Medicine and Health Sciences. University of Antwerp.  
17 Antwerp. Belgium; Peter Van Bogaert—Workforce Management and Outcomes Research in Care,  
18 Faculty of Medicine and Health Sciences. University of Antwerp. Belgium; Hans De Loof—Laboratory  
19 of Physio pharmacology, Faculty of Pharmaceutical Biomedical and Veterinary Sciences. University of  
20 Antwerp. Belgium; Kris Van den Broeck—Department of Primary Care and Interdisciplinary Care,  
21 Faculty of Medicine and Health Sciences. University of Antwerp. Antwerp. Belgium.; Sibyl  
22 Anthierens—Department of Primary Care and Interdisciplinary Care, Faculty of Medicine and Health  
23 Sciences. University of Antwerp. Antwerp. Belgium; Ine Huybrechts—Department of Primary Care and  
24 Interdisciplinary Care, Faculty of Medicine and Health Sciences. University of Antwerp. Antwerp.  
25 Belgium.; Peter Raeymaeckers—Department of Sociology, Faculty of Social Sciences, Faculty of  
26 Social Sciences. University of Antwerp. Belgium; Veerle Buffel- Department of Sociology; centre for  
27 population, family and health, Faculty of Social Sciences. University of Antwerp. Belgium.; Dirk  
28 Devroey- Department of Family Medicine and Chronic Care, Faculty of Medicine and Pharmacy. Vrije  
29 Universiteit Brussel. Brussel.; Bert Aertgeerts—Academic Centre for General Practice, Faculty of  
30 Medicine. KU Leuven. Leuven, Department of Public Health and Primary Care, Faculty of Medicine,  
31 KU Leuven. Leuven; Birgitte Schoenmakers—Department of Public Health and Primary Care, Faculty  
32 of Medicine, KU Leuven. Leuven. Belgium; Lotte Timmermans—Department of Public Health and  
33 Primary Care, Faculty of Medicine, KU Leuven. Leuven. Belgium.; Veerle Foulon—Department of  
34 Pharmaceutical and Pharmacological Sciences, Faculty Pharmaceutical Sciences. KU Leuven.  
35 Leuven. Belgium.; Anja Declerq—LUCAS-Centre for Care Research and Consultancy, Faculty of  
36 Social Sciences. KU Leuven. Leuven. Belgium.; Nick Verhaeghe—Research Group Social and  
37 Economic Policy and Social Inclusion, Research Institute for Work and Society. KU Leuven. Belgium.;

38 Dominique Van de Velde Department of Rehabilitation Sciences, Occupational Therapy. Faculty of  
39 Medicine and Health Sciences. University of Ghent. Belgium., Department of Occupational Therapy.  
40 Artevelde University of Applied Sciences. Ghent. Belgium.; Pauline Boeckxstaens—Department of  
41  
42  
43  
44  
45  
46  
47  
48  
49  
50  
51  
52  
53  
54  
55  
56  
57  
58  
59  
60

1  
2  
3 Public Health and Primary Care, Faculty of Medicine and Health sciences. University of Ghent.  
4 Belgium.; An De Sutter -Department of Public Health and Primary Care, Faculty of Medicine and  
5 Health sciences. University of Ghent. Belgium.; Patricia De Vriendt—Department of Rehabilitation  
6 Sciences, Occupational Therapy. Faculty of Medicine and Health Sciences. University of Ghent.  
7 Belgium., Frailty in Ageing (FRIA) Research Group, Department of Gerontology and Mental Health  
8 and Wellbeing (MENT) research group, Faculty of Medicine and Pharmacy. Vrije Universiteit.  
9 Brussels. Belgium., Department of Occupational Therapy. Artevelde University of Applied Sciences.  
10 Ghent. Belgium.; Lies Lahousse—Department of Bioanalysis, Faculty of Pharmaceutical Sciences,  
11 Ghent University. Ghent. Belgium.; Peter Pype—Department of Public Health and Primary Care,  
12 Faculty of Medicine and Health sciences. University of Ghent. Belgium., End-of-Life Care Research  
13 Group, Faculty of Medicine and Health Sciences. Vrije Universiteit Brussel and Ghent University.  
14 Ghent. Belgium.; Dagje Boeykens- Department of Rehabilitation Sciences, Occupational Therapy.  
15 Faculty of Medicine and Health Sciences. University of Ghent. Belgium., Department of Public Health  
16 and Primary Care, Faculty of Medicine and Health sciences. University of Ghent. Belgium.; Ann Van  
17 Hecke—Department of Public Health and Primary Care, Faculty of Medicine and Health sciences.  
18 University of Ghent. Belgium., University Centre of Nursing and Midwifery, Faculty of Medicine and  
19 Health Sciences. University of Ghent. Belgium.; Peter Decat—Department of Public Health and  
20 Primary Care, Faculty of Medicine and Health sciences. University of Ghent. Belgium.; Rudi Roose—  
21 Department of Social Work and Social Pedagogy, Faculty of Psychology and Educational Sciences.  
22 University Ghent. Belgium.; Sandra Martin—Expertise Centre Health Innovation. University College  
23 Leuven-Limburg. Leuven. Belgium.; Erica Rutten—Expertise Centre Health Innovation. University  
24 College Leuven-Limburg. Leuven. Belgium.; Sam Pless—Expertise Centre Health Innovation.  
25 University College Leuven-Limburg. Leuven. Belgium.; Vanessa Gauwe—Department of Occupational  
26 Therapy. Artevelde University of Applied Sciences. Ghent. Belgium.; Didier Reynaert- E-QUAL,  
27 University College of Applied Sciences Ghent. Ghent. Belgium.; Leen Van Landschoot—Department  
28 of Nursing, University of Applied Sciences Ghent. Ghent. Belgium.; Maja Lopez Hartmann—  
29 Department of Welfare and Health, Karel de Grote University of Applied Sciences and Arts. Antwerp.  
30 Belgium.; Tony Claey's- LiveLab, VIVES University of Applied Sciences. Kortrijk. Belgium.; Hilde  
31 Vandenhoudt—LiCalab, Thomas University of Applied Sciences. Turnhout. Belgium.; Kristel De  
32 Vlieghe—Department of Nursing—homecare, White-Yellow Cross. Brussels. Belgium.; Susanne Op de  
33 Beeck—Flemish Patient Platform. Heverlee. Belgium. Kristel driessens—Department of Sociology,  
34 Faculty of Social Sciences. University of Antwerp. Belgium

## References

1. Holman, H.R., *The Relation of the Chronic Disease Epidemic to the Health Care Crisis*. ACR Open Rheumatology, 2020. **2**(3): p. 167-173.
2. Misra, V., et al., *Prioritizing coordination of primary health care*. Canadian family physician Medecin de famille canadien, 2020. **66**(6): p. 399-403.

- 1
- 2
3. Lublóy, Á., J.L. Keresztúri, and G. Benedek, *Lower fragmentation of coordination in primary care is associated with lower prescribing drug costs—lessons from chronic illness care in Hungary*. *European Journal of Public Health*, 2017. **27**(5): p. 826-829.
4. Timmins, L., et al., *Predicting Fragmented Care: Beneficiary, Primary Care Physician, and Practice Characteristics*. *Health Services Research*, 2021. **56**(S2): p. 60-61.
5. Brigham R. Frandsen, P., et al., *Care Fragmentation, Quality, and Costs Among Chronically Ill Patients*. *The American Journal of Managed Care*, 2015. **21**(5).
6. J. Van der Heyden, R.C., *Gezondheidsenquête 2018: Chronische ziekten en aandoeningen*. 2018, Sciensano: Belgium.
7. World Health Organization, *Framework for action on interprofessional education and collaborative practice*. 2010, World Health Organization.
8. Orchard, C., *Persistent isolationist or collaborator? The nurse's role in interprofessional collaborative practice*. *Journal of nursing management*, 2010. **18**: p. 248-57.
9. Goodwin, N., et al., *Integrated care for patients and populations: improving outcomes by working together*. London: King's Fund, 2012.
10. Lewis, R.Q., et al., *Where next for integrated care organisations in the English NHS*. London: The Nuffield Trust, 2010.
11. Bardet, J.D., et al., *Physicians and community pharmacists collaboration in primary care: A review of specific models*. *Res Social Adm Pharm*, 2015. **11**(5): p. 602-22.
12. Chaudhri, K., et al., *General practitioner and pharmacist collaboration: does this improve risk factors for cardiovascular disease and diabetes? A systematic review protocol*. *BMJ Open*, 2019. **9**(8): p. e027634.
13. Graham, F., et al., *Barriers and facilitators to implementation of shared medical appointments in primary care for the management of long-term conditions: a systematic review and synthesis of qualitative studies*. *BMJ Open*, 2021. **11**(8): p. e046842.
14. Rathbone, A.P., et al., *Qualitative study to conceptualise a model of interprofessional collaboration between pharmacists and general practitioners to support patients' adherence to medication*. *BMJ Open*, 2016. **6**(3): p. e010488.
15. Reeves, S., et al., *Interprofessional online learning for primary healthcare: findings from a scoping review*. *BMJ Open*, 2017. **7**(8): p. e016872.
16. Schmutz, J.B., L.L. Meier, and T. Manser, *How effective is teamwork really? The relationship between teamwork and performance in healthcare teams: a systematic review and meta-analysis*. *BMJ Open*, 2019. **9**(9): p. e028280.
17. Sholl, S., et al., *Understanding the healthcare workplace learning culture through safety and dignity narratives: a UK qualitative study of multiple stakeholders' perspectives*. *BMJ Open*, 2019. **9**(5): p. e025615.
18. Van Dongen, J.J.J., et al., *Interprofessional collaboration regarding patients' care plans in primary care: a focus group study into influential factors*. *BMC family practice*, 2016. **17**(1): p. 1-10.
19. Goodwin, N., *Understanding integrated care: a complex process, a fundamental principle*. *International journal of integrated care*, 2013. **13**: p. e011-e011.
20. Valentijn, P.P., et al., *Towards a taxonomy for integrated care: a mixed-methods study*. *International journal of integrated care*, 2015. **15**: p. e003-e003.
21. Zwarenstein, M., J. Goldman, and S. Reeves, *Interprofessional collaboration: effects of practice-based interventions on professional practice and healthcare outcomes*. *Cochrane database of systematic reviews*, 2009(3).
22. Reeves, S., et al., *Interprofessional collaboration to improve professional practice and healthcare outcomes*. *Cochrane Database of Systematic Reviews*, 2017(6).
23. Reeves, S., et al., *A scoping review to improve conceptual clarity of interprofessional interventions*. *Journal of interprofessional care*, 2011. **25**(3): p. 167-174.



- 1
  - 2
  - 3
  - 4
  - 5
  - 6
  - 7
  - 8
  - 9
  - 10
  - 11
  - 12
  - 13
  - 14
  - 15
  - 16
  - 17
  - 18
  - 19
  - 20
  - 21
  - 22
  - 23
  - 24
  - 25
  - 26
  - 27
  - 28
  - 29
  - 30
  - 31
  - 32
  - 33
  - 34
  - 35
  - 36
  - 37
  - 38
  - 39
  - 40
  - 41
  - 42
  - 43
  - 44
  - 45
  - 46
  - 47
  - 48
  - 49
  - 50
  - 51
  - 52
  - 53
  - 54
  - 55
  - 56
  - 57
  - 58
  - 59
  - 60
24. Johansen, J.S., et al., *Interdisciplinary collaboration across secondary and primary care to improve medication safety in the elderly (IMMENSE study): study protocol for a randomised controlled trial*. *BMJ Open*, 2018. **8**(1): p. e020106.
25. Hoare, E., et al., *Systematic review of mental health and well-being outcomes following community-based obesity prevention interventions among adolescents*. *BMJ Open*, 2015. **5**(1): p. e006586.
26. House, S. and D. Havens, *Nurses' and Physicians' Perceptions of Nurse-Physician Collaboration: A Systematic Review*. *J Nurs Adm*, 2017. **47**(3): p. 165-171.
27. Körner, M., et al., *Interprofessional teamwork and team interventions in chronic care: A systematic review*. *J Interprof Care*, 2016. **30**(1): p. 15-28.
28. Campbell, A.R., et al., *Interventions to promote teamwork, delegation and communication among registered nurses and nursing assistants: An integrative review*. *J Nurs Manag*, 2020. **28**(7): p. 1465-1472.
29. Buljac-Samardzic, M., K.D. Doekhie, and J.D.H. van Wijngaarden, *Interventions to improve team effectiveness within health care: a systematic review of the past decade*. *Hum Resour Health*, 2020. **18**(1): p. 2.
30. Johansson, G., K. Eklund, and G. Gosman-Hedström, *Multidisciplinary team, working with elderly persons living in the community: a systematic literature review*. *Scand J Occup Ther*, 2010. **17**(2): p. 101-16.
31. Arksey, H. and L. O'Malley, *Scoping studies: towards a methodological framework*. *International Journal of Social Research Methodology*, 2005. **8**(1): p. 19-32.
32. Tricco, A.C., et al., *PRISMA Extension for Scoping Reviews (PRISMA-ScR): Checklist and Explanation*. *Ann Intern Med*, 2018. **169**(7): p. 467-473.
33. WorldBank. *High income countries*. 2021 [05-08-2021]; Available from: <https://data.worldbank.org/country/XD>.
34. Ouzzani, M., et al., *Rayyan—a web and mobile app for systematic reviews*. *Systematic Reviews*, 2016. **5**(1): p. 210.
35. Bentley, M., et al., *Interprofessional teamwork in comprehensive primary healthcare services: Findings from a mixed methods study*. *Journal of interprofessional care*, 2018. **32**(3): p. 274-283.
36. Berkowitz, S.A., et al., *Case Study: Johns Hopkins Community Health Partnership: A model for transformation*. *Healthcare (Amsterdam, Netherlands)*, 2016. **4**(4): p. 264-270.
37. Chan, B.C., et al., *Finding common ground? Evaluating an intervention to improve teamwork among primary health-care professionals*. *International journal for quality in health care : journal of the International Society for Quality in Health Care*, 2010. **22**(6): p. 519-524.
38. Coleman, M.T., et al., *Interprofessional ambulatory primary care practice-based educational program*. *Journal of interprofessional care*, 2008. **22**(1): p. 69-84.
39. Curran, V., J. Sargeant, and A. Hollett, *Evaluation of an interprofessional continuing professional development initiative in primary health care*. *Journal of Continuing Education in the Health Professions*, 2007. **27**(4): p. 241-252.
40. Goldman, J., et al., *Interprofessional primary care protocols: a strategy to promote an evidence-based approach to teamwork and the delivery of care*. *J Interprof Care*, 2010. **24**(6): p. 653-65.
41. Grace, S.M., et al., *Flexible implementation and integration of new team members to support patient-centered care*. *Healthc (Amst)*, 2014. **2**(2): p. 145-51.
42. Hilts, L., et al., *Helping primary care teams emerge through a quality improvement program*. *Family Practice*, 2013. **30**(2): p. 204-211.
43. Josi, R., M. Bianchi, and S.K. Brandt, *Advanced practice nurses in primary care in Switzerland: an analysis of interprofessional collaboration*. *BMC nursing*, 2020. **19**: p. 1.
44. Kim, L.Y., et al., *What makes team communication effective: a qualitative analysis of interprofessional primary care team members' perspectives*. *J Interprof Care*, 2019. **33**(6): p. 836-838.

- 1
- 2
- 3
- 4 45. Kotecha, J., et al., *Influence of a quality improvement learning collaborative program on team*
- 5 *functioning in primary healthcare*. Families, systems & health : the journal of collaborative
- 6 family healthcare, 2015. **33**(3): p. 222-230.
- 7
- 8 46. Legare, F., et al., *Validating a conceptual model for an inter-professional approach to shared*
- 9 *decision making: a mixed methods study*. J Eval Clin Pract, 2011. **17**(4): p. 554-64.
- 10
- 11 47. Lockhart, E., et al., *Engaging primary care physicians in care coordination for patients with*
- 12 *complex medical conditions*. Canadian Family Physician, 2019. **65**(4): p. E155-E162.
- 13
- 14 48. MacNaughton, K., S. Chreim, and I.L. Bourgeault, *Role construction and boundaries in*
- 15 *interprofessional primary health care teams: a qualitative study*. BMC health services
- 16 research, 2013. **13**: p. 486.
- 17
- 18 49. Mahmood-Yousuf, K., et al., *Interprofessional relationships and communication in primary*
- 19 *palliative care: impact of the Gold Standards Framework*. The British journal of general
- 20 practice : the journal of the Royal College of General Practitioners, 2008. **58**(549): p. 256-263.
- 21
- 22 50. Morgan, S., S. Pullon, and E. McKinlay, *Observation of interprofessional collaborative practice*
- 23 *in primary care teams: An integrative literature review*. International journal of nursing
- 24 studies, 2015. **52**(7): p. 1217-1230.
- 25
- 26 51. Morgan, S., et al., *Collaborative Care in Primary Care: The Influence of Practice Interior*
- 27 *Architecture on Informal Face-to-Face Communication—An Observational Study*. HERD:
- 28 Health Environments Research & Design Journal, 2020. **14**(1): p. 190-209.
- 29
- 30 52. Murphy, B., et al., *Change in mental health collaborative care attitudes and practice in*
- 31 *Australia Impact of participation in MHPN network meetings*. Journal of Integrated Care,
- 32 2018. **26**(1): p. 29-37.
- 33
- 34 53. Pullon, S., et al., *Observation of interprofessional collaboration in primary care practice: A*
- 35 *multiple case study*. Journal of interprofessional care, 2016. **30**(6): p. 787-794.
- 36
- 37 54. Reay, T., et al., *Legitimizing new practices in primary health care*. Health Care Manage Rev,
- 38 2013. **38**(1): p. 9-19.
- 39
- 40 55. Reeves, S., et al., *Interprofessional collaboration to improve professional practice and*
- 41 *healthcare outcomes*. Cochrane Database Syst Rev, 2017. **6**(6): p. Cd000072.
- 42
- 43 56. Robben, S., et al., *Impact of interprofessional education on collaboration attitudes, skills, and*
- 44 *behavior among primary care professionals*. The Journal of continuing education in the
- 45 health professions, 2012. **32**(3): p. 196-204.
- 46
- 47 57. Rodriguez, C. and M. Pozzebon, *The implementation evaluation of primary care groups of*
- 48 *practice: a focus on organizational identity*. BMC Fam Pract, 2010. **11**: p. 15.
- 49
- 50 58. Rodriguez, H.P., et al., *Availability of primary care team members can improve teamwork and*
- 51 *readiness for change*. Health care management review, 2016. **41**(4): p. 286-295.
- 52
- 53 59. Russell, G.M., et al., *Contextual levers for team-based primary care: lessons from reform*
- 54 *interventions in five jurisdictions in three countries*. Family Practice, 2018. **35**(3): p. 276-284.
- 55
- 56 60. Sargeant, J., E. Loney, and G. Murphy, *Effective interprofessional teams: "contact is not*
- 57 *enough" to build a team*. The Journal of continuing education in the health professions, 2008.
- 58 **28**(4): p. 228-234.
- 59
- 60 61. Tierney, E., et al., *Interdisciplinary team working in the Irish primary healthcare system:*
- 61 *Analysis of 'invisible' bottom up innovations using Normalisation Process Theory*. Health
- 62 Policy, 2019. **123**(11): p. 1083-1092.
- 63
- 64 62. Valaitis, R., et al., *Examining Interprofessional teams structures and processes in the*
- 65 *implementation of a primary care intervention (Health TAPESTRY) for older adults using*
- 66 *normalization process theory*. BMC Family Practice, 2020. **21**(1): p. 14.
- 67
- 68 63. van Dongen, J.J.J., et al., *Suitability of a Programme for Improving Interprofessional Primary*
- 69 *Care Team Meetings*. International journal of integrated care, 2018. **18**(4): p. 12-12.
- 70
- 71 64. van Dongen, J.J.J., et al., *Development of a Customizable Programme for Improving*
- 72 *Interprofessional Team Meetings: An Action Research Approach*. Int J Integr Care, 2018.
- 73 **18**(1): p. 8.

- 1
  - 2
  - 3
  - 4
  - 5
  - 6
  - 7
  - 8
  - 9
  - 10
  - 11
  - 12
  - 13
  - 14
  - 15
  - 16
  - 17
  - 18
  - 19
  - 20
  - 21
  - 22
  - 23
  - 24
  - 25
  - 26
  - 27
  - 28
  - 29
  - 30
  - 31
  - 32
  - 33
  - 34
  - 35
  - 36
  - 37
  - 38
  - 39
  - 40
  - 41
  - 42
  - 43
  - 44
  - 45
  - 46
  - 47
  - 48
  - 49
  - 50
  - 51
  - 52
  - 53
  - 54
  - 55
  - 56
  - 57
  - 58
  - 59
  - 60
65. van Dongen, J.J., et al., *Interprofessional collaboration regarding patients' care plans in primary care: a focus group study into influential factors*. BMC Fam Pract, 2016. **17**: p. 58.
66. Wener, P. and R.L. Woodgate, *Collaborating in the context of co-location: a grounded theory study*. BMC family practice, 2016. **17**: p. 30.
67. Wilcock, P.M., C. Campion-Smith, and M. Head, *The Dorset Seedcorn Project: interprofessional learning and continuous quality improvement in primary care*. British Journal of General Practice, 2002. **52**: p. S39-S44.
68. Young, J., et al., *Shared care requires a shared vision: communities of clinical practice in a primary care setting*. Journal of Clinical Nursing, 2017. **26**(17): p. 2689-2702.
69. Ruth Mingli, Z., S. Yu Fan, and K. Gerald Choon-Huat, *Attitudes towards interprofessional collaboration among primary care physicians and nurses in Singapore*. Journal of Interprofessional Care. **30**(4): p. 505-511.
70. Lavelle, M., et al., *An evidence based framework for the Temporal Observational Analysis of Teamwork in healthcare settings*. Appl Ergon, 2020. **82**: p. 102915.
71. Anderson, J., M. Lavelle, and G. Reedy, *Understanding adaptive teamwork in health care: Progress and future directions*. Journal of Health Services Research & Policy, 2020. **26**: p. 135581962097843.
72. Braithwaite, J., et al., *The basis of clinical tribalism, hierarchy and stereotyping: a laboratory-controlled teamwork experiment*. BMJ Open, 2016. **6**(7): p. e012467.
73. McInnes, S., et al., *An integrative review of facilitators and barriers influencing collaboration and teamwork between general practitioners and nurses working in general practice*. Journal of Advanced Nursing, 2015. **71**(9): p. 1973-1985.
74. Liedvogel, M., E. Haesler, and K. Anderson, *Who will be running your practice in 10 years?: Supporting GP registrars' awareness and knowledge of practice ownership*. Australian family physician, 2013. **42**(5): p. 333-336.
75. Lockwood, A. and F. Maguire, *General Practitioners and Nurses Collaborating in General Practice*. Australian Journal of Primary Health, 2000. **6**: p. 19-29.
76. Edmondson, A.C., *The fearless organization: Creating psychological safety in the workplace for learning, innovation, and growth*. 2018: John Wiley & Sons.
77. Kim, S., H. Lee, and T.P. Connerton, *How psychological safety affects team performance: mediating role of efficacy and learning behavior*. Frontiers in psychology, 2020. **11**: p. 1581.
78. Edmondson, A., *Psychological safety and learning behavior in work teams*. Administrative science quarterly, 1999. **44**(2): p. 350-383.
79. Frazier, M.L., et al., *Psychological Safety: A Meta-Analytic Review and Extension*. Personnel Psychology, 2017. **70**(1): p. 113-165.
80. Vardaman, J.M., et al., *Beyond communication: the role of standardized protocols in a changing health care environment*. Health Care Manage Rev, 2012. **37**(1): p. 88-97.
81. Bomhof-Roordink, H., et al., *Shared decision making in oncology: A model based on patients', health care professionals', and researchers' views*. Psycho-Oncology, 2019. **28**(1): p. 139-146.
82. Elwyn, G., et al., *Shared decision making: a model for clinical practice*. Journal of general internal medicine, 2012. **27**(10): p. 1361-1367.
83. Müller, M., et al., *Impact of the communication and patient hand-off tool SBAR on patient safety: a systematic review*. BMJ Open, 2018. **8**(8): p. e022202.
84. Lo, L., L. Rotteau, and K. Shojania, *Can SBAR be implemented with high fidelity and does it improve communication between healthcare workers? A systematic review*. BMJ Open, 2021. **11**(12): p. e055247.
85. Rasin-Waters, D., et al., *The Integrated Care Team Approach of the Department of Veterans Affairs (VA): Geriatric Primary Care*. Archives of Clinical Neuropsychology, 2018. **33**(3): p. 280-289.
86. Friedman, E.M. and P.K. Tong, *A Framework for Integrating Family Caregivers into the Health Care Team*. 2020, Santa Monica, CA: RAND Corporation.



- 1  
2  
3 87. Ugalde, A., et al., *Effective integration of caregivers and families as part of the care team for*  
4 *people with cancer*. Australian Journal for General Practitioners, 2021. **50**: p. 527-531.  
5  
6  
7  
8  
9  
10  
11  
12  
13  
14  
15  
16  
17  
18  
19  
20  
21  
22  
23  
24  
25  
26  
27  
28  
29  
30  
31  
32  
33  
34  
35  
36  
37  
38  
39  
40  
41  
42  
43  
44  
45  
46  
47  
48  
49  
50  
51  
52  
53  
54  
55  
56  
57  
58  
59  
60

For peer review only

Records identified through database search in Pubmed, Medline, Eric, and Web of Science (n = 1,816)

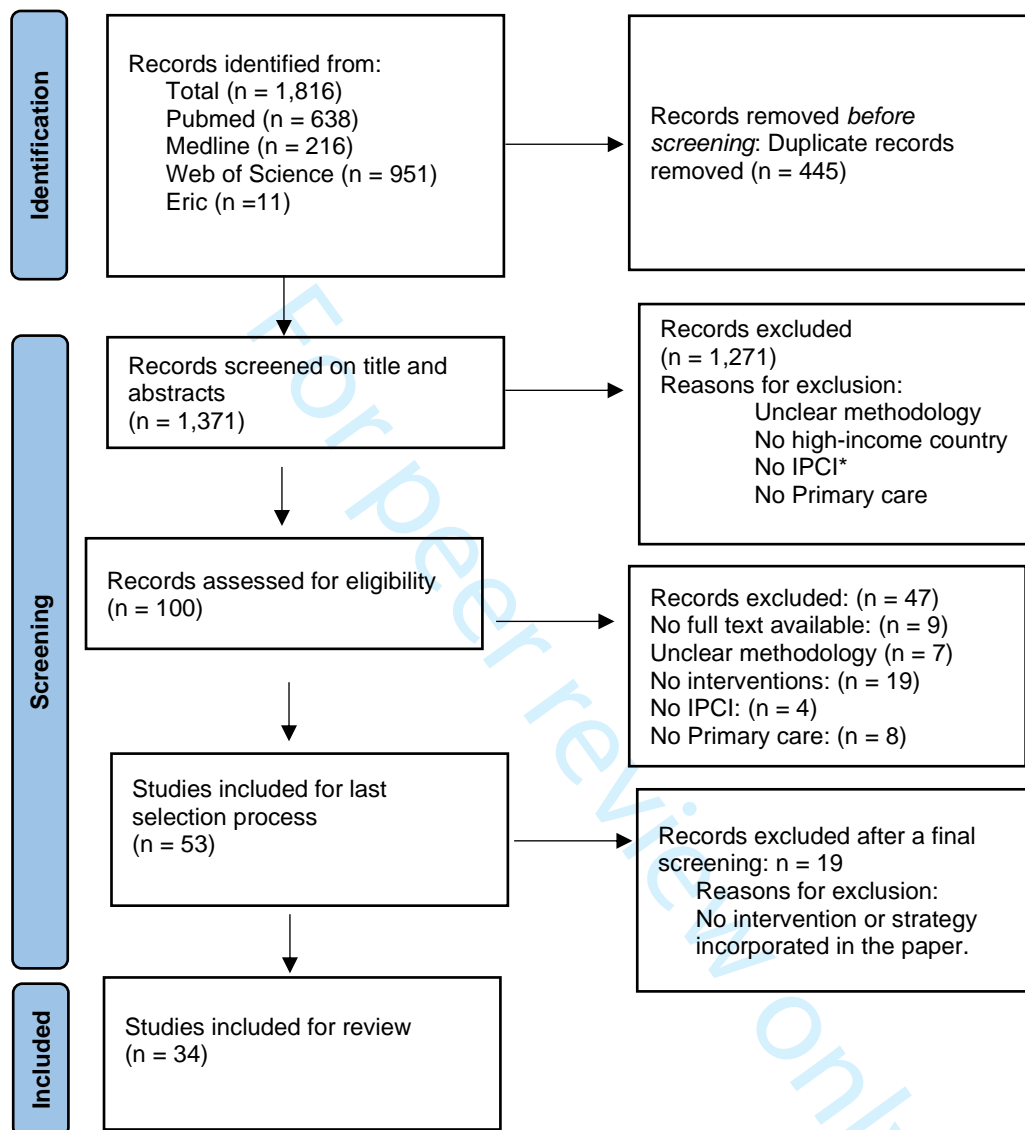

Figure 1: PRISMA flow diagram. PRISMA, Preferred Reporting Items for Scoping reviews (\*IPCI= Interprofessional collaboration or integration)

## Preferred Reporting Items for Systematic reviews and Meta-Analyses extension for Scoping Reviews (PRISMA-ScR) Checklist

| SECTION                                               | ITEM | PRISMA-ScR CHECKLIST ITEM                                                                                                                                                                                                                                                                                  | REPORTED ON PAGE #   |
|-------------------------------------------------------|------|------------------------------------------------------------------------------------------------------------------------------------------------------------------------------------------------------------------------------------------------------------------------------------------------------------|----------------------|
| <b>TITLE</b>                                          |      |                                                                                                                                                                                                                                                                                                            |                      |
| Title                                                 | 1    | Identify the report as a scoping review.                                                                                                                                                                                                                                                                   | 1                    |
| <b>ABSTRACT</b>                                       |      |                                                                                                                                                                                                                                                                                                            |                      |
| Structured summary                                    | 2    | Provide a structured summary that includes (as applicable): background, objectives, eligibility criteria, sources of evidence, charting methods, results, and conclusions that relate to the review questions and objectives.                                                                              | 1,2                  |
| <b>INTRODUCTION</b>                                   |      |                                                                                                                                                                                                                                                                                                            |                      |
| Rationale                                             | 3    | Describe the rationale for the review in the context of what is already known. Explain why the review questions/objectives lend themselves to a scoping review approach.                                                                                                                                   | 2 and 3              |
| Objectives                                            | 4    | Provide an explicit statement of the questions and objectives being addressed with reference to their key elements (e.g., population or participants, concepts, and context) or other relevant key elements used to conceptualize the review questions and/or objectives.                                  | 2 and 3              |
| <b>METHODS</b>                                        |      |                                                                                                                                                                                                                                                                                                            |                      |
| Protocol and registration                             | 5    | Indicate whether a review protocol exists; state if and where it can be accessed (e.g., a Web address); and if available, provide registration information, including the registration number.                                                                                                             | /                    |
| Eligibility criteria                                  | 6    | Specify characteristics of the sources of evidence used as eligibility criteria (e.g., years considered, language, and publication status), and provide a rationale.                                                                                                                                       | 4 and 5              |
| Information sources*                                  | 7    | Describe all information sources in the search (e.g., databases with dates of coverage and contact with authors to identify additional sources), as well as the date the most recent search was executed.                                                                                                  | 3                    |
| Search                                                | 8    | Present the full electronic search strategy for at least 1 database, including any limits used, such that it could be repeated.                                                                                                                                                                            | 3 and 4 + table 1    |
| Selection of sources of evidence†                     | 9    | State the process for selecting sources of evidence (i.e., screening and eligibility) included in the scoping review.                                                                                                                                                                                      | 3 and 4              |
| Data charting process‡                                | 10   | Describe the methods of charting data from the included sources of evidence (e.g., calibrated forms or forms that have been tested by the team before their use, and whether data charting was done independently or in duplicate) and any processes for obtaining and confirming data from investigators. | 4 and 5              |
| Data items                                            | 11   | List and define all variables for which data were sought and any assumptions and simplifications made.                                                                                                                                                                                                     | 3-5                  |
| Critical appraisal of individual sources of evidence§ | 12   | If done, provide a rationale for conducting a critical appraisal of included sources of evidence; describe the methods used and how this information was used in any data synthesis (if appropriate).                                                                                                      | Not required for ScR |

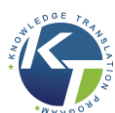

| SECTION                                       | ITEM | PRISMA-ScR CHECKLIST ITEM                                                                                                                                                                       | REPORTED ON PAGE #     |
|-----------------------------------------------|------|-------------------------------------------------------------------------------------------------------------------------------------------------------------------------------------------------|------------------------|
| Synthesis of results                          | 13   | Describe the methods of handling and summarizing the data that were charted.                                                                                                                    | 5                      |
| <b>RESULTS</b>                                |      |                                                                                                                                                                                                 |                        |
| Selection of sources of evidence              | 14   | Give numbers of sources of evidence screened, assessed for eligibility, and included in the review, with reasons for exclusions at each stage, ideally using a flow diagram.                    | 5, 6, and figure 1     |
| Characteristics of sources of evidence        | 15   | For each source of evidence, present characteristics for which data were charted and provide the citations.                                                                                     | 5, table 2 and table 3 |
| Critical appraisal within sources of evidence | 16   | If done, present data on critical appraisal of included sources of evidence (see item 12).                                                                                                      | /                      |
| Results of individual sources of evidence     | 17   | For each included source of evidence, present the relevant data that were charted that relate to the review questions and objectives.                                                           | 5 – 10 + table 3 and 4 |
| Synthesis of results                          | 18   | Summarize and/or present the charting results as they relate to the review questions and objectives.                                                                                            | 10-13                  |
| <b>DISCUSSION</b>                             |      |                                                                                                                                                                                                 |                        |
| Summary of evidence                           | 19   | Summarize the main results (including an overview of concepts, themes, and types of evidence available), link to the review questions and objectives, and consider the relevance to key groups. | 13 and 14              |
| Limitations                                   | 20   | Discuss the limitations of the scoping review process.                                                                                                                                          | 14 and 15              |
| Conclusions                                   | 21   | Provide a general interpretation of the results with respect to the review questions and objectives, as well as potential implications and/or next steps.                                       | 15                     |
| <b>FUNDING</b>                                |      |                                                                                                                                                                                                 |                        |
| Funding                                       | 22   | Describe sources of funding for the included sources of evidence, as well as sources of funding for the scoping review. Describe the role of the funders of the scoping review.                 | 15                     |

JB1 = Joanna Briggs Institute; PRISMA-ScR = Preferred Reporting Items for Systematic reviews and Meta-Analyses extension for Scoping Reviews.

\* Where *sources of evidence* (see second footnote) are compiled from, such as bibliographic databases, social media platforms, and Web sites.

† A more inclusive/heterogeneous term used to account for the different types of evidence or data sources (e.g., quantitative and/or qualitative research, expert opinion, and policy documents) that may be eligible in a scoping review as opposed to only studies. This is not to be confused with *information sources* (see first footnote).

‡ The frameworks by Arksey and O'Malley (6) and Levac and colleagues (7) and the JBI guidance (4, 5) refer to the process of data extraction in a scoping review as data charting.

§ The process of systematically examining research evidence to assess its validity, results, and relevance before using it to inform a decision. This term is used for items 12 and 19 instead of "risk of bias" (which is more applicable to systematic reviews of interventions) to include and acknowledge the various sources of evidence that may be used in a scoping review (e.g., quantitative and/or qualitative research, expert opinion, and policy document).

From: Tricco AC, Lillie E, Zarin W, O'Brien KK, Colquhoun H, Levac D, et al. PRISMA Extension for Scoping Reviews (PRISMA-ScR): Checklist and Explanation. *Ann Intern Med.* 2018;169:467–473. doi: [10.7326/M18-0850](https://doi.org/10.7326/M18-0850).

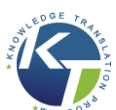

St. Michael's

Inspired Care.  
Inspiring Science.

For peer review only - <http://bmjopen.bmj.com/site/about/guidelines.xhtml>

# BMJ Open

## A scoping review to identify strategies and interventions improving interprofessional collaboration and integration in primary care

|                                 |                                                                                                                                                                                                                                                                                                                                                                                                                                                          |
|---------------------------------|----------------------------------------------------------------------------------------------------------------------------------------------------------------------------------------------------------------------------------------------------------------------------------------------------------------------------------------------------------------------------------------------------------------------------------------------------------|
| Journal:                        | <i>BMJ Open</i>                                                                                                                                                                                                                                                                                                                                                                                                                                          |
| Manuscript ID                   | bmjopen-2022-062111.R1                                                                                                                                                                                                                                                                                                                                                                                                                                   |
| Article Type:                   | Original research                                                                                                                                                                                                                                                                                                                                                                                                                                        |
| Date Submitted by the Author:   | 22-May-2022                                                                                                                                                                                                                                                                                                                                                                                                                                              |
| Complete List of Authors:       | Sirimsi, Muhammed Mustafa; University of Antwerp, Center for General Practice<br>De Loof, Hans; University of Antwerp, Pharmaceutical sciences<br>Van den Broeck, Kris; University of Antwerp, Department of General Practice<br>De Vliegheer, Kristel; Wit-Gele Kruis van Vlaanderen<br>Pype, Peter; Univ Ghent,<br>Remmen, Roy; University of Antwerp, Primary and interdisciplinary care van Bogaert, Peter; Universiteit Antwerpen Campus Drie Eiken |
| <b>Primary Subject Heading</b>: | Health services research                                                                                                                                                                                                                                                                                                                                                                                                                                 |
| Secondary Subject Heading:      | Public health, Health policy, General practice / Family practice, Mental health, Patient-centred medicine                                                                                                                                                                                                                                                                                                                                                |
| Keywords:                       | PRIMARY CARE, Organisation of health services < HEALTH SERVICES ADMINISTRATION & MANAGEMENT, PUBLIC HEALTH, Protocols & guidelines < HEALTH SERVICES ADMINISTRATION & MANAGEMENT, Quality in health care < HEALTH SERVICES ADMINISTRATION & MANAGEMENT                                                                                                                                                                                                   |
|                                 |                                                                                                                                                                                                                                                                                                                                                                                                                                                          |

SCHOLARONE™  
Manuscripts

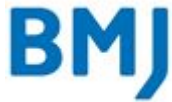

I, the Submitting Author has the right to grant and does grant on behalf of all authors of the Work (as defined in the below author licence), an exclusive licence and/or a non-exclusive licence for contributions from authors who are: i) UK Crown employees; ii) where BMJ has agreed a CC-BY licence shall apply, and/or iii) in accordance with the terms applicable for US Federal Government officers or employees acting as part of their official duties; on a worldwide, perpetual, irrevocable, royalty-free basis to BMJ Publishing Group Ltd ("BMJ") its licensees and where the relevant Journal is co-owned by BMJ to the co-owners of the Journal, to publish the Work in this journal and any other BMJ products and to exploit all rights, as set out in our [licence](#).

The Submitting Author accepts and understands that any supply made under these terms is made by BMJ to the Submitting Author unless you are acting as an employee on behalf of your employer or a postgraduate student of an affiliated institution which is paying any applicable article publishing charge ("APC") for Open Access articles. Where the Submitting Author wishes to make the Work available on an Open Access basis (and intends to pay the relevant APC), the terms of reuse of such Open Access shall be governed by a Creative Commons licence – details of these licences and which [Creative Commons](#) licence will apply to this Work are set out in our licence referred to above.

Other than as permitted in any relevant BMJ Author's Self Archiving Policies, I confirm this Work has not been accepted for publication elsewhere, is not being considered for publication elsewhere and does not duplicate material already published. I confirm all authors consent to publication of this Work and authorise the granting of this licence.

Title: A scoping review to identify strategies and interventions improving interprofessional collaboration and integration in primary care

*Authors: Muhammed Mustafa Sirimsi<sup>1,2</sup>, Hans De Loof<sup>3</sup>, Kris Van Den Broeck<sup>2</sup>, Kristel De Vlieghe<sup>4</sup>, Peter Pype<sup>5,6</sup>, Roy Remmen<sup>2</sup>, Peter Van Bogaert<sup>1</sup>*

*Affiliations:*

<sup>1</sup>Centre for research and innovation in care (CRIC), Faculty of Medicine and Health Sciences. University of Antwerp. Antwerp. Belgium

<sup>2</sup>Family Medicine and Population Health (FAMPOP), Faculty of Medicine and Health Sciences. University of Antwerp. Antwerp. Belgium

<sup>3</sup>Laboratory of Physiopharmacology, Faculty of pharmaceutical sciences, University of Antwerp, Antwerp, Belgium

<sup>4</sup>White-Yellow Cross of Flanders, Brussels, Belgium

<sup>5</sup>Center for family medicine, Department of Public Health and Primary Care, Faculty of Medicine and Health Sciences, Ghent University, Ghent, Belgium

<sup>6</sup>End-of-Life Care Research Group, Vrije Universiteit Brussel and Ghent University, Ghent, Belgium

*Corresponding author: Muhammed Mustafa Sirimsi*

*E-mail authors: [muhammedmustafa.sirimsi@uantwerpen.be](mailto:muhammedmustafa.sirimsi@uantwerpen.be); [Hans.deloo@uantwerpen.be](mailto:Hans.deloo@uantwerpen.be); [Kris.vandenbroeck@uantwerpen.be](mailto:Kris.vandenbroeck@uantwerpen.be); [Kristel.de.vlieghe@vlaanderen.wgk.be](mailto:Kristel.de.vlieghe@vlaanderen.wgk.be); [peter.pype@ugent.be](mailto:peter.pype@ugent.be); [roy.remmen@uantwerpen.be](mailto:roy.remmen@uantwerpen.be); [peter.vanbogaert@uantwerpen.be](mailto:peter.vanbogaert@uantwerpen.be)*

## Abstract

**Objective:** To identify strategies and interventions used to improve interprofessional collaboration and integration in primary care.

**Design:** Scoping review

**Data Sources:** Specific Medical Subject Headings (MeSH-terms) were used, and a search strategy was developed for Pubmed and afterwards adapted to Medline, Eric, and Web of Science.

**Study selection:** In the first stage of the selection, two researchers screened the article abstracts to select eligible papers. When decisions conflicted, three other researchers joined the decision-making process. The same strategy was used with full-text screening. Articles were included if they: (i) were in English, (ii) described an intervention to improve interprofessional collaboration or integration (IPCI) in primary care involving at least two different healthcare disciplines, (iii) originated from a high-income country, (iv) were peer-reviewed; and (v) were published between 2001 and 2020.

**Data extraction and synthesis:** From each paper, eligible data were extracted, and the selected papers were analysed inductively. Studying the main focus of the papers, researchers searched for common patterns in answering the research question and exposing research gaps. The identified themes were discussed and adjusted until a consensus was reached among all authors.

**Results:** The literature search yielded a total of 1816 papers. After removing duplicates, screening titles, and abstracts, and performing full-text readings, 34 papers were incorporated in this scoping review. The identified strategies and interventions were inductively categorized under five main themes; (i) Acceptance and team readiness towards collaboration, (ii) acting as a team and not as an individual; (iii) communication strategies and shared decision making, (iv) coordination in primary care, and (v) integration of caregivers and their skills and competences.

**Conclusions:** We identified a mix of strategies and interventions that can function as 'building blocks', for the development of a generic intervention to improve collaboration in different types of primary care settings and organisations.

### Strengths and limitations of this study

- The review focuses exclusively on primary care; thus, our findings are not directly transferable to other healthcare levels.
- Only articles written in English were included. Therefore we may have missed valuable literature.
- Only studies performed in high-income countries were included in this review; hence, our findings are not directly transferable to other countries because differences in health systems, financing, governance, title protection and culture can pose significant implementation challenges.
- The risk of bias to the interpretation of the data was minimised by triangulating researchers from different backgrounds (e.g. nurses, pharmacists and a psychologist) throughout the whole review process and conducting the selection of articles with a team of at least two researchers.
- We did not limit the search to the collaboration between specific types of caregivers, or in relation to a specific disease, or condition of patients. Therefore, our data and analysis can be used in the context of or added to a broad scope of interprofessional collaboration and integration in primary care.

## Introduction

As the world population is ageing, the growing complexity of health care and health needs, together with the associated financial challenges<sup>[1]</sup> and the fragmentation of primary care,<sup>[2-4]</sup> are prompting a fundamental rethink of how primary care should be organised and how professionals in different settings should collaborate.<sup>[5]</sup> As approximately one-third of the world population lives with a chronic disease,<sup>[6]</sup> and as primary care is usually the first point of access to the care system, integrated care at that level in which professionals closely collaborate, both interdisciplinary and interprofessional, is unquestionably important in current and future care organisations.

Interprofessional collaboration can be beneficial to achieving a more integrated primary health care and should overcome the aforementioned challenges and problems. According to the World Health Organisation, interprofessional collaboration occurs when two or more professions work together to achieve common goals.<sup>[7]</sup> Orchard et al.<sup>[8]</sup> defines it as involving a partnership between a team of health professionals and a client in a participatory, collaborative and coordinated approach to shared decision-making around health and social



1  
2  
3 issues. As Goodwin et al.<sup>[9]</sup> and Lewis et al.<sup>[10]</sup> see an efficient interprofessional collaboration  
4 as a prerequisite for integrated care, Edmondson et al.<sup>[11]</sup> indicated that psychological safety,  
5 defined as a shared belief that the team is safe for interpersonal risk-taking, is a critical  
6 factor in understanding teamwork and organisational learning.  
7

8  
9 Next to health professionals, informal caregivers are involved in interprofessional  
10 collaboration.<sup>[12]</sup> According to the World Health Organisation,<sup>[13]</sup> informal caregivers should  
11 be considered full partners in care and they mostly consist of families and friends of the  
12 patient. To measure the collaboration and coordination of these formal and informal  
13 caregivers many questionnaires are available.<sup>[14]</sup> The assessment of interprofessional team  
14 collaboration scale (AITCS) is an example consisting of the subscales; partnership,  
15 cooperation and coordination, and can be deployed in primary healthcare.<sup>[15]</sup>  
16

17  
18 To achieve and maintain interprofessional collaboration in primary care, Bardet et al.<sup>[16]</sup>  
19 identified the following key elements: trust, interdependence, perceptions and expectations  
20 from the other health care professionals, their skills, their interest for collaborative practice,  
21 their role definition and their communication.<sup>[17-23]</sup> These key elements are also present in  
22 the five dimensions of integrated care that Valentijn et al.<sup>[24, 25]</sup> described in the Rainbow  
23 model as follows: system, organisational, professional, clinical, functional, and normative  
24 integration. Integrated care and quality collaboration between professionals leads to  
25 improved access to care<sup>[26]</sup>, better health outcomes<sup>[27]</sup>, and enhanced prevention.<sup>[28, 29]</sup>  
26  
27

28  
29 Although several literature reviews identified strategies to influence, improve or facilitate  
30 interprofessional collaboration, a thorough analysis of the interventions is lacking. Most  
31 review papers focused on the collaboration of a single type of caregiver or one specific  
32 disease.<sup>[27, 30-38]</sup> Therefore, it is difficult to broaden these findings to primary care and  
33 chronic conditions in general.  
34

35  
36 To fill this gap, we performed a scoping review to identify strategies and interventions  
37 improving and/or facilitating interprofessional collaboration and integration (IPCI) in primary  
38 care. More specifically, we listed and analysed the existing strategies, interventions and their  
39 outcomes, without focussing on a specific profession or disease. Based on the definitions of  
40 interprofessional collaboration<sup>[7, 8]</sup> and integrated care<sup>[9, 10, 24, 25]</sup>, we included papers, thus  
41 outlining strategies and interventions working on micro, meso and macro-level. The included  
42 papers described organisational, relational and processual factors influenced by these  
43 interventions and strategies.  
44

45  
46 This review was conducted as the first phase of a research project to develop an evidence-  
47 based toolkit, guiding health professionals in their transition towards IPCI of different  
48 competencies, skills and roles as well as the role of patients and their needs in primary care.  
49

## 50 51 **Methods**

52  
53 We conducted a scoping review using the Arksey and O'Malley framework<sup>[39]</sup>: (i) identifying  
54 the research questions, (ii) identifying relevant studies, (iii) selecting studies, (iv) charting the  
55 data and (v) collating, summarising and reporting results. We used the PRISMA-ScR guidelines  
56 and the PRISMA-ScR templates to help conduct the scoping review<sup>[40]</sup>.  
57

### 58 **Step 1: Identifying the research questions**

59  
60

An exploratory literature search was performed preliminarily to identifying the research question on IPCI in primary care. Based on this literature search, we developed the following research question: Which strategies and/or interventions improve or facilitate interprofessional collaboration and integration in primary care? We aimed to search for articles containing generic strategies and methods used in primary care settings, to facilitate IPCI in primary care. Five researchers were involved in identifying this research question for the scoping review.

## Step 2: Identifying relevant studies: search strategy

We used specific Medical Subject Headings (MeSH-terms) and free text terms to design a search strategy around the following key concepts: primary care, health care team, integration and interprofessional collaboration. We combined the keywords and MeSH terms presented in Table 1 with the Boolean terms 'OR', 'AND' and 'NOT'. The search strategy was developed for Pubmed and afterwards adapted to Medline, Eric and Web of Science. The search was performed between March and June 2020.

| MeSh/search terms and combinations for Pubmed                                                |
|----------------------------------------------------------------------------------------------|
| 1. primary care                                                                              |
| 2. primary healthcare                                                                        |
| 3. primary health care                                                                       |
| 1 or 2 or 3 (Title/abstract)                                                                 |
| 5. integrative team                                                                          |
| 6. integrative teams                                                                         |
| 7. collaborative practice                                                                    |
| 8. collaborative practices                                                                   |
| 9. interdisciplinary team                                                                    |
| 10. interdisciplinary teams                                                                  |
| 11. multidisciplinary team                                                                   |
| 12. multidisciplinary teams                                                                  |
| 13. interprofessional team                                                                   |
| 14. interprofessional teams                                                                  |
| 15. healthcare team                                                                          |
| 16. healthcare teams                                                                         |
| 17. health care team                                                                         |
| 18. health care teams                                                                        |
| 5 or 6 or 7 or 8 or 9 or 10 or 11 or 12 or 13 or 14 or 15 or 16 or 17 or 18 (title/abstract) |
| 20. interprofessional collaboration                                                          |
| 21. interprofessional teamwork                                                               |
| 22. interprofessional team work                                                              |
| 23. interdisciplinary collaboration                                                          |
| 24. interdisciplinary teamwork                                                               |
| 25. interdisciplinary team work                                                              |
| 26. multidisciplinary collaboration                                                          |
| 20 or 21 or 22 or 23 or 24 or 25 or 26 (All fields)                                          |
| 4 AND 19 AND 27                                                                              |

Table 1: keywords and MeSH terms used to identify relevant data.

### Step 3: Study selection

Articles were included if they: (i) were in English, (ii) described an intervention to improve interprofessional collaboration or integration in primary care involving at least two different healthcare disciplines, (iii) originated from a high-income country,<sup>[41]</sup> (iv) were peer-reviewed and (v) were published between 2001 and 2020. Articles were excluded when: (i) the research methods and findings were not thoroughly described, (ii) it concerned opinion papers, (iii) the study focused on a single disease or group of patients/clients and (iv) when the full text was not available.

We used Rayyan<sup>[42]</sup> to collect and organise eligible articles. In the first stage of the selection, MMS and PVB screened the article abstracts to select eligible papers, according to the inclusion and exclusion criteria, and to eliminate the duplicates. When decisions conflicted, three other researchers (HDL, KdV, KVdB) joined the decision-making process; they were blind to the decisions of the first two reviewers, and each screened a third of the conflicting abstracts. In the second stage of the selection, the initial two reviewers read the full texts of the selected articles. As in the first stage, studies were included or excluded depending on the agreement of both reviewers. When the decisions of the two reviewers conflicted, the other researchers joined the decision-making process and a procedure similar to the one outlined above was followed.

#### 2.4. Charting the data

From each paper, eligible data were extracted using a self-developed descriptive template. The following characteristics were recorded: a full reference citation (author, title, journal and publication date); the methodology used to conduct the research; a summary of the intervention or strategy used to facilitate IPCI and the impact on IPCI.

#### Step 5: Collating, summarising and reporting the data

The selected papers were analysed inductively. Studying the main focus of the papers, we searched for common patterns among them, answering the research question and/or exposing research gaps. We, thus, identified themes and subthemes, which were discussed and adjusted until consensus was reached among all authors. Subsequently, all selected papers were coded using the defined themes. Using a tabular overview and summary of the selected literature, the iterative analysis and discussion among the authors were facilitated and allowed the extraction of the interventions and strategies of interest.

#### Patient and public involvement

This scoping review did not directly involve patients or public.

## Results

The literature search yielded a total of 1,816 papers, of which 445 duplicates were removed (Figure 1). Upon screening titles and abstracts of the remaining 1,371 records, only 100 were eligible given the inclusions criteria outlined above. After further reading, 47 studies, lacking an intervention, were excluded. Finally, 19 more articles were excluded because they did not include strategies or interventions. This resulted in 34 papers describing strategies and

interventions to facilitate IPCI in primary care. A Flow diagram on the selection procedure is available in figure 1.

### Study characteristics

| Author and year       | Title                                                                                                                           | Journal                                                   | Country     | Study design                                                                                                           | Intervention/strategy                                                                                                                                                                                                                 |
|-----------------------|---------------------------------------------------------------------------------------------------------------------------------|-----------------------------------------------------------|-------------|------------------------------------------------------------------------------------------------------------------------|---------------------------------------------------------------------------------------------------------------------------------------------------------------------------------------------------------------------------------------|
| Bentley et al. 2017   | Interprofessional teamwork in comprehensive primary healthcare services: findings from a mixed methods study                    | Journal of interprofessional care                         | Australia   | Mixed methods study. Online survey, and interviews with managers and practitioners                                     | Introduction of a comprehensive primary healthcare (CPHC) method                                                                                                                                                                      |
| Berkowitz et al. 2016 | Case study: Johns Hopkins community health partnership: a model for transformation                                              | The journal of delivery science and innovation            | USA         | Case study                                                                                                             | The Johns Hopkins Community Health Partnership (J-CHiP). A community-based intervention using multidisciplinary care.                                                                                                                 |
| Chan et al. 2010      | Finding common ground? Evaluating an intervention to improve teamwork among primary health-care professionals                   | International journal of quality in health care           | Australia   | Mixed methods study: Qualitative interviews, observations and a survey assessing multidisciplinary teamwork were used. | A 6-month intervention (The Team-link intervention) consisting of an educational workshop and structured facilitation using specially designed materials, backed up by informal telephone support.                                    |
| Coleman et al. 2008   | Interprofessional ambulatory primary care practice-based educational program                                                    | Journal of interprofessional care                         | USA         | A longitudinal cohort study with a quantitative evaluation.                                                            | STAR-project: an educational program for teams of nurse practitioners, family medicine residents and social work students to work together at clinical sites in the delivery of longitudinal care in primary care ambulatory clinics. |
| Curran et al. 2007    | Evaluation of an interprofessional continuing professional development initiative in primary health care                        | Journal of continuing education in the health professions | Canada      | Mixed methods study: An evaluation research design, pre- to post-study with quantitative and qualitative instruments.  | Introducing The Building a Better Tomorrow Initiative (BBTI), which is a continuing professional development (CPD) program.                                                                                                           |
| Goldman et al. 2010   | Interprofessional primary care protocols: a strategy to promote an evidence-based approach to teamwork and the delivery of care | Journal of interprofessional care                         | Canada      | Qualitative study.                                                                                                     | Implementation of an interprofessional protocol                                                                                                                                                                                       |
| Grace et al. 2014     | Flexible implementation and integration of new team members to support patient-centred care                                     | The journal of delivery science and innovation            | USA         | Mixed methods: Interviews and a survey with primary care professionals.                                                | Introduction of interprofessional primary care protocols                                                                                                                                                                              |
| Hilts et al. 2013     | Helping primary care teams emerge through a quality improvement program                                                         | Oxford academic: family practice                          | Canada      | A qualitative exploratory case study approach.                                                                         | Introducing a quality improvement program.                                                                                                                                                                                            |
| Josi et al. 2020      | Advanced practice nurses in primary care in Switzerland: an analysis of interprofessional collaboration                         | BMC nursing                                               | Switzerland | Qualitative study with an ethnographic design.                                                                         | Integration of an advanced practice nurse in a primary care team.                                                                                                                                                                     |
| Kim et al. 2019       | What makes team communication effective: a qualitative analysis of interprofessional primary care team members' perspectives    | Journal of interprofessional care                         | USA         | Qualitative study. Grounded theory method of constant comparison.                                                      | Standardized communication tools used with the implementation of the patient-centred medical home (PCMH)                                                                                                                              |

|                            |                                                                                                                                                   |                                               |                |                                                                                                                          |                                                                                                                                                                                                                                                                     |
|----------------------------|---------------------------------------------------------------------------------------------------------------------------------------------------|-----------------------------------------------|----------------|--------------------------------------------------------------------------------------------------------------------------|---------------------------------------------------------------------------------------------------------------------------------------------------------------------------------------------------------------------------------------------------------------------|
| Kotecha et al. 2015        | Influence of a quality improvement learning collaborative program on team functioning in primary healthcare                                       | Journal of collaborative family healthcare    | Canada         | A qualitative study using a phenomenological approach was conducted as part of a mixed-method evaluation.                | Quality Improvement Learning Collaborative Program to support the development of interdisciplinary team function and improve chronic disease management, disease prevention, and access to care.                                                                    |
| Légaré et al. 2020         | Validating a conceptual model for an inter-professional approach to shared decision making: a mixed methods study                                 | Journal of evaluation in clinical practice    | Canada         | Qualitative study. Thematic analysis of the transcripts and a descriptive analysis of the questionnaires were performed. | An interprofessional shared decision-making model.                                                                                                                                                                                                                  |
| Lockhart et al. 2019       | Engaging primary care physicians in care coordination for patients with complex medical conditions                                                | Canadian family physician                     | Canada         | Qualitative study. Care professionals were interviewed 14 to 19 months after the initiation of an intervention.          | Initiation of the Seamless Care Optimizing the Patient Experience (SCOPE) project.                                                                                                                                                                                  |
| Macnaughton et al. 2013    | Role construction and boundaries in interprofessional primary health care teams: a qualitative study                                              | BMC health service research                   | Canada         | A qualitative, comparative case study with observations was conducted.                                                   | Introduction of a model to explore how roles are constructed within interprofessional health care teams. It focuses on elucidating the different types of role boundaries, the influences on role construction and the implications for professionals and patients. |
| Mahmoud-Yousef et al. 2008 | Interprofessional relationships and communication in primary palliative care: impact of the gold standards framework                              | The British journal of general practice       | United kingdom | Qualitative interview case study.                                                                                        | Adoption of an interprofessional collaboration framework to investigate the extent to which the framework influences interprofessional relationships and communication, and to compare general practitioners' and nurses' experiences.                              |
| Morgan et al. 2015         | Observation of interprofessional collaborative practice in primary care teams: an integrative literature review                                   | International journal of nursing studies      | New Zealand    | Integrative literature review                                                                                            | Several strategies to improve interprofessional collaboration in primary care teams                                                                                                                                                                                 |
| Morgan et al. 2020         | Collaborative care in primary care: the influence of practice interior architecture on informal face-to-face communication—an observational study | Health environments research & design journal | New Zealand    | Qualitative study with observations                                                                                      | Changing the architecture of primary care settings to explore the influence of primary care practice interior architecture on face-to-face on-the-fly communication for collaborative care.                                                                         |
| Murphy et al. 2017         | Change in mental health collaborative care attitudes and practice in Australia impact of participation in MHPN network meetings                   | Journal of integrated care                    | Australia      | Quantitative study: an online survey.                                                                                    | Introduction of the Mental Health Professionals Network. Investigating attitudinal and practice changes amongst health professionals after participation in MHPN's network meetings.                                                                                |
| Pullon et al. 2016         | Observation of interprofessional collaboration in primary care practice: a multiple case study                                                    | Journal of interprofessional care             | New Zealand    | Qualitative study, using a case study design with observations.                                                          | Identifying existing strategies to maintain and improve interprofessional collaboration in primary care practices.                                                                                                                                                  |

|                       |                                                                                                                                                                                       |                                                           |             |                                                                                                                                                                                                                                                            |                                                                                                                                                                                                                                                                                       |   |   |   |    |    |    |    |    |    |    |    |    |    |    |    |    |    |    |    |    |    |    |    |    |    |    |    |    |    |    |    |    |    |    |    |    |    |    |    |    |    |    |    |    |    |    |    |    |    |    |    |    |    |    |
|-----------------------|---------------------------------------------------------------------------------------------------------------------------------------------------------------------------------------|-----------------------------------------------------------|-------------|------------------------------------------------------------------------------------------------------------------------------------------------------------------------------------------------------------------------------------------------------------|---------------------------------------------------------------------------------------------------------------------------------------------------------------------------------------------------------------------------------------------------------------------------------------|---|---|---|----|----|----|----|----|----|----|----|----|----|----|----|----|----|----|----|----|----|----|----|----|----|----|----|----|----|----|----|----|----|----|----|----|----|----|----|----|----|----|----|----|----|----|----|----|----|----|----|----|----|----|
| 1                     | 2                                                                                                                                                                                     | 3                                                         | 4           | 5                                                                                                                                                                                                                                                          | 6                                                                                                                                                                                                                                                                                     | 7 | 8 | 9 | 10 | 11 | 12 | 13 | 14 | 15 | 16 | 17 | 18 | 19 | 20 | 21 | 22 | 23 | 24 | 25 | 26 | 27 | 28 | 29 | 30 | 31 | 32 | 33 | 34 | 35 | 36 | 37 | 38 | 39 | 40 | 41 | 42 | 43 | 44 | 45 | 46 | 47 | 48 | 49 | 50 | 51 | 52 | 53 | 54 | 55 | 56 | 57 | 58 | 59 | 60 |
| Reay et al. 2013      | Legitimizing new practices in primary health care                                                                                                                                     | Health care management review                             | Canada      | A qualitative, longitudinal comparative case study.                                                                                                                                                                                                        | Developing effective interdisciplinary teams in primary health care.                                                                                                                                                                                                                  |   |   |   |    |    |    |    |    |    |    |    |    |    |    |    |    |    |    |    |    |    |    |    |    |    |    |    |    |    |    |    |    |    |    |    |    |    |    |    |    |    |    |    |    |    |    |    |    |    |    |    |    |    |    |
| Reeves et al. 2017    | Interprofessional collaboration to improve professional practice and healthcare outcomes                                                                                              | Cochrane review                                           | Canada      | Systematic review                                                                                                                                                                                                                                          | Nine interventions were analysed.                                                                                                                                                                                                                                                     |   |   |   |    |    |    |    |    |    |    |    |    |    |    |    |    |    |    |    |    |    |    |    |    |    |    |    |    |    |    |    |    |    |    |    |    |    |    |    |    |    |    |    |    |    |    |    |    |    |    |    |    |    |    |
| Robben et al. 2012    | Impact of interprofessional education on collaboration attitudes, skills, and behaviour among primary care professionals                                                              | Journal of continuing education in the health professions | Netherlands | Mixed methods study: Before-after study, using the Interprofessional Attitudes Questionnaire, Attitudes Toward Health Care Teams Scale, and Team Skills Scale. Additionally, semi-structured interviews were conducted                                     | Introduction of an interprofessional education program with interdisciplinary workshops.                                                                                                                                                                                              |   |   |   |    |    |    |    |    |    |    |    |    |    |    |    |    |    |    |    |    |    |    |    |    |    |    |    |    |    |    |    |    |    |    |    |    |    |    |    |    |    |    |    |    |    |    |    |    |    |    |    |    |    |    |
| Rodriguez et al. 2010 | The implementation evaluation of primary care groups of practice: a focus on organizational identity                                                                                  | BMC family practice                                       | Canada      | Qualitative study. An in-depth longitudinal case study was conducted over two and a half years.                                                                                                                                                            | Implementation of primary care groups of practice, with a focus on the emergence of the organizational identity.                                                                                                                                                                      |   |   |   |    |    |    |    |    |    |    |    |    |    |    |    |    |    |    |    |    |    |    |    |    |    |    |    |    |    |    |    |    |    |    |    |    |    |    |    |    |    |    |    |    |    |    |    |    |    |    |    |    |    |    |
| Rodriguez et al. 2015 | Availability of primary care team members can improve teamwork and readiness for change                                                                                               | Health care management review                             | USA         | Quantitative study with a survey, using path analysis.                                                                                                                                                                                                     | A four-stage developmental interprofessional collaborative relationship-building model: To assess primary care team structure (team size, team member availability, and access to interdisciplinary expertise), teamwork, and readiness for change.                                   |   |   |   |    |    |    |    |    |    |    |    |    |    |    |    |    |    |    |    |    |    |    |    |    |    |    |    |    |    |    |    |    |    |    |    |    |    |    |    |    |    |    |    |    |    |    |    |    |    |    |    |    |    |    |
| Russell et al. 2018   | Contextual levers for team-based primary care: lessons from reform interventions in five jurisdictions in three countries                                                             | Health service research                                   | Canada      | An international consortium of researchers met via teleconference and regular face-to-face meetings using a Collaborative Reflexive Deliberative Approach to re-analyse and synthesize their published and unpublished data and their own work experience. | Determining existing strategies and methods to improve interprofessional collaboration and integration in primary care.                                                                                                                                                               |   |   |   |    |    |    |    |    |    |    |    |    |    |    |    |    |    |    |    |    |    |    |    |    |    |    |    |    |    |    |    |    |    |    |    |    |    |    |    |    |    |    |    |    |    |    |    |    |    |    |    |    |    |    |
| Sargeant et al. 2008  | Effective interprofessional teams: "contact is not enough" to build a team                                                                                                            | Journal of continuing education in the health professions | Canada      | Qualitative, grounded theory study.                                                                                                                                                                                                                        | Introducing an interprofessional educational program.                                                                                                                                                                                                                                 |   |   |   |    |    |    |    |    |    |    |    |    |    |    |    |    |    |    |    |    |    |    |    |    |    |    |    |    |    |    |    |    |    |    |    |    |    |    |    |    |    |    |    |    |    |    |    |    |    |    |    |    |    |    |
| Tierney et al. 2019   | Interdisciplinary team working in the Irish primary healthcare system: analysis of 'invisible' bottom-up innovations using normalisation process theory                               | Journal of health policy                                  | Ireland     | Mixed methods study: An online survey and an interview study.                                                                                                                                                                                              | Bottom-up innovations using Normalisation Process Theory: (1) Design and delivery of educational events in the community for preventive care and health promotion. (2) Development of integrated care plans for people with complex health needs. (3) Advocacy on behalf of patients. |   |   |   |    |    |    |    |    |    |    |    |    |    |    |    |    |    |    |    |    |    |    |    |    |    |    |    |    |    |    |    |    |    |    |    |    |    |    |    |    |    |    |    |    |    |    |    |    |    |    |    |    |    |    |
| Valaitis et al. 2020  | Examining interprofessional teams structures and processes in the implementation of a primary care intervention (health tapestry) for older adults using normalization process theory | BMC family practice                                       | Canada      | Qualitative study. This study applied Normalization Process Theory (NPT) and used a descriptive qualitative approach embedded in a mixed-methods, pragmatic randomized controlled trial.                                                                   | Strengthening Quality [Health TAPESTRY] is a primary care intervention aimed at supporting older adults that involves trained volunteers, interprofessional teams, technology, and system navigation.                                                                                 |   |   |   |    |    |    |    |    |    |    |    |    |    |    |    |    |    |    |    |    |    |    |    |    |    |    |    |    |    |    |    |    |    |    |    |    |    |    |    |    |    |    |    |    |    |    |    |    |    |    |    |    |    |    |



|                              |                                                                                                                              |                                          |                |                                                                                                                                               |                                                                                                                                                                                                        |
|------------------------------|------------------------------------------------------------------------------------------------------------------------------|------------------------------------------|----------------|-----------------------------------------------------------------------------------------------------------------------------------------------|--------------------------------------------------------------------------------------------------------------------------------------------------------------------------------------------------------|
| Van Dongen et al. 2018a      | Suitability of a programme for improving interprofessional primary care team meetings                                        | International journal of integrated care | Netherlands    | Mixed methods study: a process evaluation using a mixed-methods approach including both qualitative and quantitative data.                    | Introducing a multifaceted programme including a reflection framework, training activities and a toolbox.                                                                                              |
| Van Dongen et al. 2016       | Interprofessional collaboration regarding patients' care plans in primary care: a focus group study into influential factors | BMC family practice                      | Netherlands    | Qualitative study with an inductive content analysis.                                                                                         | Improving interprofessional collaboration by using patients' care plans.                                                                                                                               |
| Van Dongen et al. 2018b      | Development of a customizable programme for improving interprofessional team meetings: an action research approach           | International journal of integrated care | Netherlands    | Qualitative study with an action research approach.                                                                                           | A Customizable Programme for Improving Interprofessional Team Meetings                                                                                                                                 |
| Wener & Woodgate et al. 2016 | Collaborating in the context of co-location: a grounded theory study                                                         | BMC family practice                      | Canada         | A qualitative research paradigm where the exploration is grounded in the providers' experiences.                                              | A four-stage developmental interprofessional collaborative relationship-building model to guide health care providers and leaders as they integrate mental health services into primary care settings. |
| Wilcock et al. 2002          | The Dorset Seedcorn project: interprofessional learning and continuous quality improvement in primary care                   | British journal of general practice      | United Kingdom | Mixed methods study. Participants kept reflective journals. The evaluation was undertaken using a mix of questionnaires and staff interviews. | The Dorset Seedcorn Project: interprofessional learning and continuous quality improvement in primary care. Implementing the principles and methods of continuous quality improvement.                 |
| Young et al. 2017            | Shared care requires a shared vision: communities of clinical practice in a primary care setting                             | BMC health service research              | New Zealand    | Qualitative study with observations. A focused ethnography of nine 'Communities of Clinical Practice'.                                        | Introducing the 'Community of Clinical Practice' (CoCP) model. Forming a vision of care which is shared by patients and the primary care professionals involved in their care.                         |

Table 2: An overview of the characteristics of the selected articles.

## Findings

Five main themes, essential for IPCI, emerged from our analyses: (i) Acceptance and team readiness towards collaboration (n=21), (ii) acting as a team and not as an individual (n=26); (iii) communication strategies and shared decision making (n=16), (iv) coordination in primary care (n=20), and (v) integration of caregivers and their skills and competences (n=16). An overview of the interventions is presented in Table 2, while an overview of the articles sorted in themes is presented in Table 3.

| Articles                         | Acceptance and team readiness towards collaboration | Acting as a team and not as an individual | Communication strategies and shared decision making | Coordination in primary care | Integration of caregivers and their skills and competences |
|----------------------------------|-----------------------------------------------------|-------------------------------------------|-----------------------------------------------------|------------------------------|------------------------------------------------------------|
| Bentley et al. <sup>[43]</sup>   |                                                     | X                                         | X                                                   | X                            |                                                            |
| Berkowitz et al. <sup>[44]</sup> |                                                     |                                           |                                                     | X                            |                                                            |
| Chan et al. <sup>[45]</sup>      | X                                                   | X                                         |                                                     | X                            |                                                            |
| Coleman et al. <sup>[46]</sup>   | X                                                   |                                           | X                                                   | X                            |                                                            |
| Curran et al. <sup>[47]</sup>    | X                                                   | X                                         | X                                                   | X                            | X                                                          |
| Goldman et al. <sup>[48]</sup>   | X                                                   | X                                         | X                                                   |                              | X                                                          |
| Grace et al. <sup>[49]</sup>     | X                                                   | X                                         | X                                                   |                              | X                                                          |

|                                       |           |           |           |           |           |
|---------------------------------------|-----------|-----------|-----------|-----------|-----------|
| Hilts et al. <sup>[50]</sup>          | X         | X         |           |           | X         |
| Josi et al. <sup>[51]</sup>           |           | X         | X         |           | X         |
| Kim et al. <sup>[52]</sup>            | X         |           | X         | X         |           |
| Kotecha et al. <sup>[53]</sup>        |           | X         | X         | X         |           |
| Légaré et al. <sup>[54]</sup>         | X         | X         | X         |           | X         |
| Lockhart et al. <sup>[55]</sup>       |           | X         |           | X         |           |
| MacNaughton et al. <sup>[56]</sup>    |           | X         |           | X         | X         |
| Mahmood-Yousef et al. <sup>[57]</sup> | X         |           | X         | X         |           |
| Morgan 2015 <sup>[58]</sup>           | X         | X         | X         |           |           |
| Morgan 2020 <sup>[59]</sup>           |           |           |           | X         |           |
| Murphy et al. <sup>[60]</sup>         | X         |           |           | X         | X         |
| Pullon et al. <sup>[61]</sup>         |           | X         |           | X         |           |
| Reay et al. <sup>[62]</sup>           | X         | X         |           | X         |           |
| Reeves et al. <sup>[63]</sup>         |           |           | X         | X         |           |
| Robben et al. <sup>[64]</sup>         |           | X         |           |           |           |
| Rodriquez 2010. <sup>[65]</sup>       |           |           |           |           | X         |
| Rodriquez 2015 <sup>[66]</sup>        | X         | X         |           | X         |           |
| Russell et al. <sup>[67]</sup>        | X         | X         |           |           | X         |
| Sargeant et al. <sup>[68]</sup>       | X         | X         |           | X         | X         |
| Tierney et al. <sup>[69]</sup>        | X         | x         | X         |           | X         |
| Valaitis et al. <sup>[70]</sup>       |           | X         |           | X         | X         |
| Van Dongen 2018a <sup>[71]</sup>      | X         | X         | X         | X         | X         |
| Van Dongen 2018b <sup>[72]</sup>      | X         | X         | X         |           | X         |
| Van Dongen 2016 <sup>[73]</sup>       |           | X         |           |           |           |
| Wener & Woodgate <sup>[74]</sup>      | X         | X         |           | X         | X         |
| Wilcock et al. <sup>[75]</sup>        | X         | X         |           |           |           |
| Young et al. <sup>[76]</sup>          | X         | X         | X         |           |           |
| # Articles                            | <b>21</b> | <b>26</b> | <b>16</b> | <b>20</b> | <b>16</b> |

Table 3: Articles sorted in themes (X= paper included under that theme)

*Theme 1: Acceptance and team readiness towards collaboration*

Twenty-one articles provided strategies to improve the acceptance and team readiness towards collaboration.<sup>[45-50, 52, 54, 57, 58, 60, 62, 66-69, 71, 72, 74-76]</sup> Before being able to collaborate, caregivers need to accept working as a team. Team readiness towards collaboration occurs when team members obtain the right mindset to take necessary measures for efficient collaboration. This does not mean that an efficient collaboration has been reached, but both acceptance and team readiness were a prerequisite to achieving it. Acceptance and team readiness of caregivers towards collaboration were strongly influenced by their attitude, awareness, knowledge and understanding, and caregiver satisfaction.

Interventions on changing caregivers' attitudes towards collaboration seem to facilitate teamwork.<sup>[77]</sup> Workshops and information sessions were organised to make changes in caregivers' attitudes, in which advantages of teamwork and finding common ground were explained and lectured.<sup>[46, 54, 66, 67, 71, 72, 74, 76]</sup> Basic knowledge about the potential of teamwork was learned using logical explanations.<sup>[44, 46, 54, 66, 67, 71, 72, 74, 76]</sup> Caregivers to whom the advantages of collaboration were explained were more likely to accept and adopt the principles of interprofessional collaboration. Simple and accessible knowledge transfer seems to be an important characteristic of a successful intervention on the attitude and knowledge of caregivers.<sup>[45, 57, 68, 71, 72]</sup>



1  
2  
3 Some articles<sup>[46, 48, 52, 60, 71, 76]</sup> reported on strategies to increase awareness about  
4 collaboration in primary care. Increased awareness resulted in a better acceptance and team  
5 readiness towards collaboration. Making caregivers aware of their shortcomings and the  
6 need for collaboration with different disciplines seemed an effective way to facilitate  
7 interprofessional collaboration. In addition to awareness, potential improvements in care  
8 quality<sup>[46, 49, 75]</sup>, caused by better collaboration, motivate caregivers to change their attitude.  
9 Furthermore, some studies<sup>[47, 50, 58, 62, 69, 74, 75]</sup> reported that increased caregiver satisfaction  
10 was considered as a facilitator of collaboration between caregivers.  
11  
12

### 13 *Theme 2: Acting as a team and not as an individual*

14  
15 Twenty-six articles provided strategies to act as a team and not as an individual.<sup>[43, 45, 47-51, 53-</sup>  
16 56, 58, 61, 62, 64, 66-76] In some articles<sup>[62, 66, 68, 74, 75]</sup>, this was mentioned as collaborative  
17 behaviour, which was considered to be a facilitator of teamwork. Moreover, showing mutual  
18 respect and trust<sup>[53, 54, 56, 66, 71, 72, 74-76]</sup> between caregivers were important facilitators towards  
19 collaboration: it improves acting as a team, and it supports a safe team climate. An  
20 environment of greater psychological safety improved collaborative behaviour, and in some  
21 cases, it replaced working in silos with working as a team.<sup>[47, 50, 55, 61, 73, 75]</sup>  
22  
23

24  
25 Developing and enhancing a shared vision, shared values and shared goals were mentioned  
26 as facilitators towards interprofessional collaboration.<sup>[43, 45, 49, 54, 74, 76]</sup> This was achieved by a  
27 structural inclusion of every team member in the development of the teams' vision, values  
28 and goals.<sup>[76]</sup> By simply writing down these principles, caregivers were more likely to  
29 participate in developing shared principles.<sup>[45, 49]</sup> Although the development process was not  
30 explained in detail, three articles mentioned that once developed, shared vision, goals and  
31 values were crucial to maintaining a beneficial collaboration.<sup>[54, 74, 76]</sup> To establish these  
32 shared principles, a patient-centred focus may be an important asset. By prioritising the  
33 patient's needs and preferences, caregivers can find common ground more easily.<sup>[51, 69-72, 76]</sup>  
34  
35

36  
37 Leadership seems of utmost importance to act as a team. Strategies towards collaborative  
38 leadership and shared leadership were mentioned in the articles,<sup>[43, 48, 51, 53, 56, 64, 67, 71, 73]</sup> and  
39 leaders and decision makers should be aware of the potential effects of policy and structural  
40 changes on interprofessional teamwork. By using a clear role assignment, caregivers can  
41 prevent issues in their collaboration.<sup>[58, 71, 74, 76]</sup> However, in one case,<sup>[50]</sup> a rotational  
42 leadership was implemented and suggested, in which there was no permanent leader.  
43  
44

45 One paper emphasised that awareness of potential unintended negative effects of changes  
46 on the functioning of interprofessional teams should be taken into account by decision  
47 makers.<sup>[51]</sup>  
48

### 49 *Theme 3: Communication strategies and shared decision-making*

50  
51 Sixteen articles provided communication strategies and strategies to facilitate shared  
52 decision-making, to improve interprofessional collaboration in primary care.<sup>[43, 46-49, 51-54, 57, 58,</sup>  
53 63, 69, 71, 72, 76] These strategies can be further delineated into the following subthemes: (i)  
54 knowledge about each other,<sup>[49, 69, 71]</sup> (ii) formal and informal meetings,<sup>[43, 47, 51, 58, 63, 71, 72]</sup> (iii)  
55 the use of structured guidelines and protocols,<sup>[48, 49, 69, 72]</sup> (iv) conflict resolution<sup>[46, 51, 57, 71, 72,</sup>  
56 76] and (v) relational equality.<sup>[52-54, 76]</sup>  
57  
58

59 Knowing each other's professional roles and tasks seems a precondition for teamwork.  
60 However, knowing more about each other's family situation, interests and hobbies was also

1  
2  
3 mentioned to be important to improve the communication and collaboration between  
4 caregivers.<sup>[49, 69, 71]</sup>  
5

6 Both formal<sup>[47, 51, 63, 71, 72]</sup> and informal<sup>[43, 58, 72]</sup> team meetings, mainly happening between  
7 caregivers working in the same practice (under one roof),<sup>[58]</sup> were considered as an  
8 important communication strategy. Formal meetings were mostly used to share information  
9 about patients or clients, distribute tasks and identify and solve problems in the  
10 organisation. Planning and structuring a team meeting can increase the efficiency and  
11 productivity of these meetings.<sup>[47, 51, 63, 71, 72]</sup> Informal meetings were important to know  
12 more about each other and facilitated the trust relations between caregivers. Information  
13 that could not be shared in the formal meetings often appeared in the informal meetings.  
14 Even lunches with team members were used as a communication strategy.<sup>[43, 58, 72]</sup>  
15  
16  
17

18 Structured guidelines, standardised tools and protocols were used to improve the  
19 communication and coordination between caregivers working in primary care. These  
20 protocols provided more effective communication and the provision of an evidence-based  
21 approach towards collaboration and care delivery. Besides using protocols, workshops were  
22 organised to improve communication.<sup>[48, 49, 69, 72]</sup>  
23  
24

25 Making decisions as a team was an indicator of good and effective communication. Shared  
26 decision-making was mentioned in nine studies,<sup>[46, 51-54, 57, 71, 72, 76]</sup> and our analysis identified  
27 conflict resolution<sup>[46, 51, 57, 71, 72, 76]</sup> and relational equality<sup>[52-54, 76]</sup> as key factors to improve  
28 shared decision-making.  
29

#### 30 *Theme 4: Coordination in primary care*

  
31

32 By collaborating with different disciplines and professions, many caregivers were  
33 experiencing problems regarding information sharing<sup>[44, 45, 52, 53, 61, 62, 68, 70, 71, 74]</sup> and  
34 referring<sup>[43, 44, 46, 47, 52, 53, 57, 66, 71, 74]</sup> between primary health care workers. Twenty articles,  
35 therefore, provided strategies to improve coordination in order to ameliorate information  
36 sharing between caregivers, to facilitate referrals for the patient and to guarantee the  
37 continuity of care.<sup>[43-47, 52, 53, 55-57, 59-64, 66, 70, 71, 74]</sup> Accordingly, reciprocity and reciprocal  
38 interdependence were shown to play a crucial role in the coordination of primary care.<sup>[66, 74]</sup>  
39  
40

41 Co-location and the importance of architecture and building characteristics were, in some  
42 cases, mentioned as influential factors for collaboration.<sup>[56, 59, 63]</sup> By optimising the  
43 architecture and working under one roof, brief face-to-face interactions may increase. The  
44 architecture could be optimised by having shared spaces, thus leading to increased staff  
45 proximity or visibility. Especially informal communication was positively affected by the  
46 presence of convenient circulatory (e.g. foyers and lobbies) and transitional (e.g. courtyards,  
47 verandas, and corridors) spaces.<sup>[56, 59, 63]</sup> Additionally, weekly or monthly face-to-face  
48 meetings were organised to coordinate care. Face-to-face meetings and electronic task  
49 queues facilitate information sharing and efficient care coordination for complex patients.<sup>[59,  
50 63]</sup>  
51  
52  
53

#### 54 *Theme 5: Integration of caregivers and their skills and competences*

  
55

56 Fifteen papers provided strategies to improve the integration of caregivers and their skills  
57 and competences in primary care practices<sup>[47-51, 54, 56, 60, 65, 67-72, 74]</sup> and tried to get the most  
58 out of every team member's presence.  
59  
60

1  
2  
3 For new team members, a successful integration was facilitated by welcoming the  
4 newcomers and making them know and understand the vision of the practice. Inclusion of  
5 the caregiver required additional proactive efforts regarding communication and  
6 coordination among practice members.<sup>[49, 74]</sup> In some cases, a personal, one-to-one meeting  
7 with the new team member could facilitate problem-solving.<sup>[49]</sup>  
8  
9

10 Eleven papers presented an improved integration of caregivers skills and competences, as a  
11 facilitator for task distribution and role clarification.<sup>[47, 48, 50, 51, 54, 56, 67, 70-72, 74]</sup> Knowing each  
12 other's capabilities, including skills and competences, was very important in this regard.<sup>[48, 50,  
13 56, 74]</sup> Additionally, making sure that caregivers not only know each other's skills and  
14 competences but also enable more transparency about their daily needs and preferences  
15 were mentioned as facilitators.<sup>[50, 56, 67, 71, 74]</sup> Six articles presented strategies to optimise the  
16 use of team members' skills and competences. By acknowledging and affirming their  
17 capabilities, integration of skills and competences was facilitated.<sup>[54, 60, 65, 69, 71, 74]</sup>  
18  
19

20 In one article, researchers indicated that the organisation of team communication-training  
21 workshops and implementation of flexible protocols gave practice stakeholders significant  
22 discretion to integrate new care team roles to best fit local needs. Furthermore, it improved  
23 team communication and functioning because of increased engagement and local leadership  
24 facilitation.<sup>[49]</sup>  
25  
26

## 27 Discussion

28  
29 This scoping review identified five themes for interventions and strategies aimed at  
30 improving and facilitating IPCI in primary care. The first category, which incorporates  
31 acceptance, and team readiness, was a precondition for enhancing and maintaining efficient  
32 interprofessional collaboration. Accepting to collaborate requires a change of attitude,  
33 which involves valuing team members and actively soliciting the opinions or receiving  
34 feedback from other team members.<sup>[78]</sup> An major barrier to adopting a suitable attitude  
35 towards collaboration is the difficulty and complexity of sharing responsibility for patient  
36 care within a team.<sup>[79, 80]</sup> Making caregivers aware of their shortcomings and the need for  
37 collaboration with different disciplines are effective ways to facilitate interprofessional  
38 collaboration.<sup>[46, 48, 52, 60, 71, 76]</sup> In addition, Liedvogel et al.<sup>[81]</sup> demonstrates that experiencing  
39 teamwork itself increases the awareness of the advantages, and the importance of  
40 collaboration, as well as gives caregivers opportunities to demonstrate their skills and  
41 capabilities. In the broader community, increased awareness of the importance of  
42 interprofessional collaboration can lead to an improved experience and understanding of  
43 the totality of healthcare services.<sup>[82]</sup> Furthermore, according to Lockwood and Maguire et  
44 al.,<sup>[83]</sup> it can also help to reduce the sense of isolation experienced by solo medical  
45 practitioners.  
46  
47  
48  
49

50  
51 Second, collaborative behaviour has been described as a facilitator of teamwork.<sup>[62, 66, 68, 74,  
52 75]</sup> To enhance and maintain a collaborative behaviour, the development of shared principles  
53 (such as shared vision, values and goals) is an important prerequisite.<sup>[43, 45, 49, 54, 74, 76]</sup> Our  
54 review revealed that maintaining a safe team climate in which care professionals feel  
55 comfortable is important to act as a team and not as an individual.<sup>[47, 50, 55, 61, 73, 75]</sup> Although  
56 psychological safety is not often mentioned in primary care research,<sup>[22]</sup> Edmondson et al.<sup>[11]</sup>  
57 and Kim et al.<sup>[84]</sup> have indicated the essential role of a safe workplace environment in  
58 enhancing teamwork. Team psychological safety is defined as a shared value; the team is  
59  
60

1  
2  
3 safe for interpersonal risk taking.<sup>[85]</sup> This means that team members feel they will not be  
4 punished or humiliated for speaking up with ideas, questions, concerns or mistakes. A team  
5 may not be able to collaborate properly if there is a lack of psychological safety; hence, it is  
6 assumed that psychological safety is a necessary but insufficient condition for increasing  
7 interprofessional collaboration and workplace effectiveness.<sup>[86]</sup>  
8  
9

10 Third, structured guidelines and protocols seem to be beneficial for communication between  
11 care professionals, thereby impacting IPCI. Team meetings, especially formal meetings can  
12 be held more efficiently by using protocols, that have positive effects on hierarchy and  
13 conflicts resolution between team members.<sup>[87]</sup> Although interventions in our review did not  
14 give attention to informal meetings as much as existing literature<sup>[88-90]</sup>, Burm et al.<sup>[88]</sup>  
15 indicated that, by recognising the importance of informal meetings, care providers are more  
16 motivated to organise or participate in informal meetings. These meetings tended to be ad-  
17 hoc and improvised, and in some cases discussion topics were recorded in notebooks.<sup>[89, 90]</sup>  
18 The shared decision-making model has been put forward as a guide for discussing and  
19 making decisions in the most effective way.<sup>[91]</sup> This model includes three principles:  
20 recognizing and acknowledging that a decision is required, knowing and understanding the  
21 best available evidence, and incorporating the patient's values and preferences into the  
22 decision.<sup>[92]</sup>  
23  
24  
25

26 Fourth, as an element of interprofessional collaboration and integration, care coordination is  
27 of utmost importance for patient safety. The situation-background-assessment-  
28 recommendation protocol is an existing method to perform information sharing efficiently  
29 and appropriately.<sup>[93]</sup> In addition, Lo et al.<sup>[94]</sup> suggest that the protocol may be a cost-  
30 effective method for coordinating between general practitioners and nurses.<sup>[94]</sup> To solve  
31 problems regarding care coordination, especially after the Covid19 pandemic, the use of  
32 digital healthcare tools was established.<sup>[95]</sup> Fagherazzi et al.<sup>[96]</sup> indicated that these digital  
33 tools improved triage and risk assessment.  
34  
35  
36

37 Finally, optimal integration of caregivers skills and competences has been associated with  
38 maximalising every team member's presence and shortening the adaptation process of new  
39 team members.<sup>[97]</sup> Family caregivers provide a significant portion of health and support  
40 services to individuals with serious illnesses; however, existing literature and health care  
41 systems have often overlooked them and mostly focused on integrating care  
42 professionals.<sup>[98, 99]</sup> Friedman et al.<sup>[98]</sup> suggest using a framework, in which the family  
43 caregiver is an indispensable partner of care professionals and patients.  
44  
45

46 Although all interventions or strategies are useful to a certain point, none is suitable to be  
47 used in isolation as a unique solution for IPCI in primary care. However, a mix of the  
48 interventions and strategies compiled in this scoping review may be capable of doing so. The  
49 consistency, design, and order of this mix of interventions and strategies cannot be specified  
50 based on the results of this scoping review.  
51  
52

53 This scoping review has several limitations. The review focuses exclusively on primary care;  
54 thus, our findings are not directly transferable to other healthcare levels. Only studies  
55 performed in high-income countries were included in this review; hence, our findings are not  
56 directly transferable to other countries because differences in health systems, financing,  
57 governance, title protection and culture can pose significant implementation challenges. In  
58 addition, by including only English-language articles and avoiding the grey literature, we  
59 might have missed some relevant papers. It is worthwhile to note, that this scoping review  
60

1  
2  
3 aimed to identify interventions that can improve interprofessional collaboration and  
4 integration in primary care and to list their impact on outcomes related to collaboration and  
5 integration. Our review did not report the effectiveness of interventions regarding health  
6 outcomes. Contrary to generic interventions focusing on IPCI, interventions focusing on a  
7 single disease and improving health outcomes were implemented more successfully and  
8 were evaluated in a more sophisticated way, using validated scales.<sup>[27, 100-102]</sup>  
9  
10

11 We selected articles based on WHO's<sup>[7]</sup> and Orchard et al.'s<sup>[8]</sup> definition of interprofessional  
12 collaboration. For integrated care, we adopted the definitions of Lewis et al.'s<sup>[10]</sup> and  
13 Valentijn et al.'s<sup>[25]</sup> definitions, which represent a widely accepted consensus. However,  
14 there are many other definitions of IPCI care that, if adopted, could affect the inclusion or  
15 exclusion of articles.  
16

17  
18 The literature has established that researchers can influence the interpretation of data. This  
19 risk of bias was minimised by triangulating researchers from different backgrounds (e.g.  
20 nurses, pharmacists and a psychologist) through the whole process and conducting the  
21 selection of articles with a team of at least two researchers. This triangulation, intensive  
22 cooperation and inductive process increased the credibility and reduced the risk of bias to  
23 the interpretation of the data based on preconceived understanding and personal opinions.  
24  
25

26 A strength of this review is the fact that we did not limit the search to the collaboration  
27 between specific types of caregivers, or in relation to a specific disease, or condition of  
28 patients. Therefore, our data and analysis can be used in the context of or added to a broad  
29 scope of IPCI in primary care. Furthermore, we performed an inductive analysis within a  
30 multidisciplinary team of researchers, to expand the analysis and to identify generic  
31 strategies and interventions.  
32  
33

## 34 Conclusion

35  
36 This scoping review identified five categories of strategies and interventions to improve or  
37 facilitate IPCI in primary care: (i) acceptance and team readiness towards collaboration, (ii)  
38 acting as a team and not as an individual, (iii) communication strategies and shared decision  
39 making, (iv) coordination in primary care and (v) integration of caregivers and their skills and  
40 competences. We did not identify a single strategy or intervention which is broad or generic  
41 enough to be used in every type of primary care setting.  
42  
43

44 We can conclude that a mix of the identified strategies and interventions, which we  
45 illustrated as 'building blocks', can provide valuable input to develop a generic intervention  
46 to be used in different settings and levels of primary health care.  
47

48 **Figure legends:** Figure 1: PRISMA flow diagram. PRISMA, Preferred Reporting Items for Scoping  
49 reviews (\*IPCI= Interprofessional collaboration or integration)  
50

51 **Funding statement:** This research was funded by fund Daniël De Coninck, King Baudouin Foundation,  
52 Belgium. The funder had no involvement in this study. Grant number: 2019-J5170820-211588  
53  
54

### 55 Contributors:

56  
57 All listed authors meet authorship criteria and no others meeting the criteria have been omitted.  
58 Development of the research question and establishment of the search strategy: MMS, HDL, KdV,  
59 KVdB, and PVB  
60

1  
2  
3 Database search: MMS and PVB

4 Record screening: MMS, PVB, HDL, KdV, and KVdB performed abstract and full text screenings

5 Data analysis: MMS, HDL, KdV, KVdB, and PVB

6 Discussion construction: MMS, HDL, KdV, KVdB, PP, RR, and PVB

7 Writing – review & editing: MMS, HDL, KdV, KVdB, PP, RR, and PVB

8 On behalf of the Primary care academy.  
9  
10

11 **Competing interests:** None declared.

12 **Patient consent for publication:** Not applicable.

13 **Ethics approval:** This study did not involve human participants and did not require ethics approval.

14 **Data availability statement:** Data sharing not applicable as no datasets generated  
15 and/or analysed for this study. All relevant review information is available in supplementary  
16 material. No primary data analysed.  
17

## 18 **Acknowledgements:**

19  
20  
21  
22 We are grateful for the partnership with the Primary Care Academy ([www.academie-eerstelijns.be](http://www.academie-eerstelijns.be)) and  
23 want to thank the King Baudouin Foundation and Fund Daniel De Coninck for the opportunity they  
24 offer us for conducting research and have impact on the primary care of Flanders, Belgium. The  
25 consortium of the Primary Care Academy consists Lead author: Roy Remmen—  
26 [roy.remmen@uantwerpen.be](mailto:roy.remmen@uantwerpen.be)—Department of Primary Care and Interdisciplinary Care, Faculty of  
27 Medicine and Health Sciences. University of Antwerp. Antwerp. Belgium; Emily Verté—Department of  
28 Primary Care and Interdisciplinary Care, Faculty of Medicine and Health Sciences. University of  
29 Antwerp. Antwerp. Belgium, Department of Family Medicine and Chronic Care, Faculty of Medicine  
30 and Pharmacy. Vrije Universiteit Brussel. Brussel. Belgium; Muhammed Mustafa Sirimsi—Centre for  
31 research and innovation in care, Faculty of Medicine and Health Sciences. University of Antwerp.  
32 Antwerp. Belgium; Peter Van Bogaert—Workforce Management and Outcomes Research in Care,  
33 Faculty of Medicine and Health Sciences. University of Antwerp. Belgium; Hans De Loof—Laboratory  
34 of Physio pharmacology, Faculty of Pharmaceutical Biomedical and Veterinary Sciences. University of  
35 Antwerp. Belgium; Kris Van den Broeck—Department of Primary Care and Interdisciplinary Care,  
36 Faculty of Medicine and Health Sciences. University of Antwerp. Antwerp. Belgium.; Sibyl  
37 Anthierens—Department of Primary Care and Interdisciplinary Care, Faculty of Medicine and Health  
38 Sciences. University of Antwerp. Antwerp. Belgium; Ine Huybrechts—Department of Primary Care and  
39 Interdisciplinary Care, Faculty of Medicine and Health Sciences. University of Antwerp. Antwerp.  
40 Belgium.; Peter Raeymaeckers—Department of Sociology, Faculty of Social Sciences, Faculty of  
41 Social Sciences. University of Antwerp. Belgium; Veerle Buffel- Department of Sociology; centre for  
42 population, family and health, Faculty of Social Sciences. University of Antwerp. Belgium.; Dirk  
43 Devroey- Department of Family Medicine and Chronic Care, Faculty of Medicine and Pharmacy. Vrije  
44 Universiteit Brussel. Brussel.; Bert Aertgeerts—Academic Centre for General Practice, Faculty of  
45  
46  
47  
48  
49  
50  
51  
52  
53  
54  
55  
56  
57  
58  
59  
60



1  
2  
3 Medicine. KU Leuven. Leuven, Department of Public Health and Primary Care, Faculty of Medicine,  
4 KU Leuven. Leuven; Birgitte Schoenmakers—Department of Public Health and Primary Care, Faculty  
5 of Medicine, KU Leuven. Leuven. Belgium; Lotte Timmermans—Department of Public Health and  
6 Primary Care, Faculty of Medicine, KU Leuven. Leuven. Belgium.; Veerle Foulon—Department of  
7 Pharmaceutical and Pharmacological Sciences, Faculty Pharmaceutical Sciences. KU Leuven.  
8 Leuven. Belgium.; Anja Declercq—LUCAS-Centre for Care Research and Consultancy, Faculty of  
9 Social Sciences. KU Leuven. Leuven. Belgium.; Nick Verhaeghe—Research Group Social and  
10 Economic Policy and Social Inclusion, Research Institute for Work and Society. KU Leuven. Belgium.;  
11 Dominique Van de Velde Department of Rehabilitation Sciences, Occupational Therapy. Faculty of  
12 Medicine and Health Sciences. University of Ghent. Belgium., Department of Occupational Therapy.  
13 Artevelde University of Applied Sciences. Ghent. Belgium.; Pauline Boeckxstaens—Department of  
14 Public Health and Primary Care, Faculty of Medicine and Health sciences. University of Ghent.  
15 Belgium.; An De Sutter -Department of Public Health and Primary Care, Faculty of Medicine and  
16 Health sciences. University of Ghent. Belgium.; Patricia De Vriendt—Department of Rehabilitation  
17 Sciences, Occupational Therapy. Faculty of Medicine and Health Sciences. University of Ghent.  
18 Belgium., Frailty in Ageing (FRIA) Research Group, Department of Gerontology and Mental Health  
19 and Wellbeing (MENT) research group, Faculty of Medicine and Pharmacy. Vrije Universiteit.  
20 Brussels. Belgium., Department of Occupational Therapy. Artevelde University of Applied Sciences.  
21 Ghent. Belgium.; Lies Lahousse—Department of Bioanalysis, Faculty of Pharmaceutical Sciences,  
22 Ghent University. Ghent. Belgium.; Peter Pype—Department of Public Health and Primary Care,  
23 Faculty of Medicine and Health sciences. University of Ghent. Belgium., End-of-Life Care Research  
24 Group, Faculty of Medicine and Health Sciences. Vrije Universiteit Brussel and Ghent University.  
25 Ghent. Belgium.; Dagje Boeykens- Department of Rehabilitation Sciences, Occupational Therapy.  
26 Faculty of Medicine and Health Sciences. University of Ghent. Belgium., Department of Public Health  
27 and Primary Care, Faculty of Medicine and Health sciences. University of Ghent. Belgium.; Ann Van  
28 Hecke—Department of Public Health and Primary Care, Faculty of Medicine and Health sciences.  
29 University of Ghent. Belgium., University Centre of Nursing and Midwifery, Faculty of Medicine and  
30 Health Sciences. University of Ghent. Belgium.; Peter Decat—Department of Public Health and  
31 Primary Care, Faculty of Medicine and Health sciences. University of Ghent. Belgium.; Rudi Roose—  
32 Department of Social Work and Social Pedagogy, Faculty of Psychology and Educational Sciences.  
33 University Ghent. Belgium.; Sandra Martin—Expertise Centre Health Innovation. University College  
34 Leuven-Limburg. Leuven. Belgium.; Erica Rutten—Expertise Centre Health Innovation. University  
35 College Leuven-Limburg. Leuven. Belgium.; Sam Pless—Expertise Centre Health Innovation.  
36 University College Leuven-Limburg. Leuven. Belgium.; Vanessa Gauwe—Department of Occupational  
37 Therapy. Artevelde University of Applied Sciences. Ghent. Belgium.; Didier Reynaert- E-QUAL,  
38 University College of Applied Sciences Ghent. Ghent. Belgium.; Leen Van Landschoot—Department  
39 of Nursing, University of Applied Sciences Ghent. Ghent. Belgium.; Maja Lopez Hartmann—

Department of Welfare and Health, Karel de Grote University of Applied Sciences and Arts. Antwerp. Belgium.; Tony Claeys- LiveLab, VIVES University of Applied Sciences. Kortrijk. Belgium.; Hilde Vandenhoudt—LiCalab, Thomas University of Applied Sciences. Turnhout. Belgium.; Kristel De Vlieghe—Department of Nursing—homecare, White-Yellow Cross. Brussels. Belgium.; Susanne Op de Beeck—Flemish Patient Platform. Heverlee. Belgium. Kristel driessens—Department of Sociology, Faculty of Social Sciences. University of Antwerp. Belgium

## References

1. Holman, H.R., *The Relation of the Chronic Disease Epidemic to the Health Care Crisis*. ACR Open Rheumatology, 2020. **2**(3): p. 167-173.
2. Misra, V., et al., *Prioritizing coordination of primary health care*. Canadian family physician Medecin de famille canadien, 2020. **66**(6): p. 399-403.
3. Lubl6y, ., J.L. Kereszturi, and G. Benedek, *Lower fragmentation of coordination in primary care is associated with lower prescribing drug costs—lessons from chronic illness care in Hungary*. European Journal of Public Health, 2017. **27**(5): p. 826-829.
4. Timmins, L., et al., *Predicting Fragmented Care: Beneficiary, Primary Care Physician, and Practice Characteristics*. Health Services Research, 2021. **56**(S2): p. 60-61.
5. Brigham R. Frandsen, P., et al., *Care Fragmentation, Quality, and Costs Among Chronically Ill Patients*. The American Journal of Managed Care, 2015. **21**(5).
6. J. Van der Heyden, R.C., *Gezondheidsenquête 2018: Chronische ziekten en aandoeningen*. 2018, Sciensano: Belgium.
7. World Health Organization, *Framework for action on interprofessional education and collaborative practice*. 2010, World Health Organization.
8. Orchard, C., *Persistent isolationist or collaborator? The nurse's role in interprofessional collaborative practice*. Journal of nursing management, 2010. **18**: p. 248-57.
9. Goodwin, N., et al., *Integrated care for patients and populations: improving outcomes by working together*. London: King's Fund, 2012.
10. Lewis, R.Q., et al., *Where next for integrated care organisations in the English NHS*. London: The Nuffield Trust, 2010.
11. Edmondson, A.C., *The fearless organization: Creating psychological safety in the workplace for learning, innovation, and growth*. 2018: John Wiley & Sons.
12. Boeykens, D., et al., *How do people living with chronic conditions and their informal caregivers experience primary care? A phenomenological-hermeneutical study*. J Clin Nurs, 2022.
13. World Health, O., *WHO global strategy on people-centred and integrated health services: interim report*. 2015, World Health Organization: Geneva.
14. Bookey-Bassett, S., et al., *A review of instruments to measure interprofessional collaboration for chronic disease management for community-living older adults*. Journal of Interprofessional Care, 2016. **30**: p. 201 - 210.
15. Orchard, C., et al., *Assessment of Interprofessional Team Collaboration Scale (AITCS): Further Testing and Instrument Revision*. J Contin Educ Health Prof, 2018. **38**(1): p. 11-18.
16. Bardet, J.D., et al., *Physicians and community pharmacists collaboration in primary care: A review of specific models*. Res Social Adm Pharm, 2015. **11**(5): p. 602-22.
17. Chaudhri, K., et al., *General practitioner and pharmacist collaboration: does this improve risk factors for cardiovascular disease and diabetes? A systematic review protocol*. BMJ Open, 2019. **9**(8): p. e027634.



- 1
- 2
- 3 18. Graham, F., et al., *Barriers and facilitators to implementation of shared medical*
- 4 *appointments in primary care for the management of long-term conditions: a systematic*
- 5 *review and synthesis of qualitative studies*. BMJ Open, 2021. **11**(8): p. e046842.
- 6 19. Rathbone, A.P., et al., *Qualitative study to conceptualise a model of interprofessional*
- 7 *collaboration between pharmacists and general practitioners to support patients' adherence*
- 8 *to medication*. BMJ Open, 2016. **6**(3): p. e010488.
- 9 20. Reeves, S., et al., *Interprofessional online learning for primary healthcare: findings from a*
- 10 *scoping review*. BMJ Open, 2017. **7**(8): p. e016872.
- 11 21. Schmutz, J.B., L.L. Meier, and T. Manser, *How effective is teamwork really? The relationship*
- 12 *between teamwork and performance in healthcare teams: a systematic review and meta-*
- 13 *analysis*. BMJ Open, 2019. **9**(9): p. e028280.
- 14 22. Sholl, S., et al., *Understanding the healthcare workplace learning culture through safety and*
- 15 *dignity narratives: a UK qualitative study of multiple stakeholders' perspectives*. BMJ Open,
- 16 2019. **9**(5): p. e025615.
- 17 23. Van Dongen, J.J.J., et al., *Interprofessional collaboration regarding patients' care plans in*
- 18 *primary care: a focus group study into influential factors*. BMC family practice, 2016. **17**(1): p.
- 19 1-10.
- 20 24. Goodwin, N., *Understanding integrated care: a complex process, a fundamental principle*.
- 21 *International journal of integrated care*, 2013. **13**: p. e011-e011.
- 22 25. Valentijn, P.P., et al., *Towards a taxonomy for integrated care: a mixed-methods study*.
- 23 *International journal of integrated care*, 2015. **15**: p. e003-e003.
- 24 26. Kaur, L. and E. Tadros, *The Benefits of Interprofessional Collaboration for a Pharmacist and*
- 25 *Family Therapist*. The American Journal of Family Therapy, 2018. **46**(5): p. 470-485.
- 26 27. Reeves, S., et al., *Interprofessional collaboration to improve professional practice and*
- 27 *healthcare outcomes*. Cochrane Database of Systematic Reviews, 2017(6).
- 28 28. Roller-Wirnsberger, R., et al., *European collaborative and interprofessional capability*
- 29 *framework for prevention and management of frailty—A consensus process supported by the*
- 30 *Joint Action for Frailty Prevention (ADVANTAGE) and the European Geriatric Medicine Society*
- 31 *(EuGMS)*. Aging clinical and experimental research, 2020. **32**(4): p. 561-570.
- 32 29. Bachynsky, N. *Implications for policy: The triple aim, quadruple aim, and interprofessional*
- 33 *collaboration*. in *Nursing Forum*. 2020. Wiley Online Library.
- 34 30. Zwarenstein, M., J. Goldman, and S. Reeves, *Interprofessional collaboration: effects of*
- 35 *practice-based interventions on professional practice and healthcare outcomes*. Cochrane
- 36 *database of systematic reviews*, 2009(3).
- 37 31. Reeves, S., et al., *A scoping review to improve conceptual clarity of interprofessional*
- 38 *interventions*. Journal of interprofessional care, 2011. **25**(3): p. 167-174.
- 39 32. Johansen, J.S., et al., *Interdisciplinary collaboration across secondary and primary care to*
- 40 *improve medication safety in the elderly (IMMENSE study): study protocol for a randomised*
- 41 *controlled trial*. BMJ Open, 2018. **8**(1): p. e020106.
- 42 33. Hoare, E., et al., *Systematic review of mental health and well-being outcomes following*
- 43 *community-based obesity prevention interventions among adolescents*. BMJ Open, 2015.
- 44 **5**(1): p. e006586.
- 45 34. House, S. and D. Havens, *Nurses' and Physicians' Perceptions of Nurse-Physician*
- 46 *Collaboration: A Systematic Review*. J Nurs Adm, 2017. **47**(3): p. 165-171.
- 47 35. Körner, M., et al., *Interprofessional teamwork and team interventions in chronic care: A*
- 48 *systematic review*. J Interprof Care, 2016. **30**(1): p. 15-28.
- 49 36. Campbell, A.R., et al., *Interventions to promote teamwork, delegation and communication*
- 50 *among registered nurses and nursing assistants: An integrative review*. J Nurs Manag, 2020.
- 51 **28**(7): p. 1465-1472.
- 52 37. Buljac-Samardzic, M., K.D. Doekhie, and J.D.H. van Wijngaarden, *Interventions to improve*
- 53 *team effectiveness within health care: a systematic review of the past decade*. Hum Resour
- 54 *Health*, 2020. **18**(1): p. 2.
- 55
- 56
- 57
- 58
- 59
- 60

- 1
  - 2
  - 3
  - 4
  - 5
  - 6
  - 7
  - 8
  - 9
  - 10
  - 11
  - 12
  - 13
  - 14
  - 15
  - 16
  - 17
  - 18
  - 19
  - 20
  - 21
  - 22
  - 23
  - 24
  - 25
  - 26
  - 27
  - 28
  - 29
  - 30
  - 31
  - 32
  - 33
  - 34
  - 35
  - 36
  - 37
  - 38
  - 39
  - 40
  - 41
  - 42
  - 43
  - 44
  - 45
  - 46
  - 47
  - 48
  - 49
  - 50
  - 51
  - 52
  - 53
  - 54
  - 55
  - 56
  - 57
  - 58
  - 59
  - 60
38. Johansson, G., K. Eklund, and G. Gosman-Hedström, *Multidisciplinary team, working with elderly persons living in the community: a systematic literature review*. Scand J Occup Ther, 2010. **17**(2): p. 101-16.
39. Arksey, H. and L. O'Malley, *Scoping studies: towards a methodological framework*. International Journal of Social Research Methodology, 2005. **8**(1): p. 19-32.
40. Tricco, A.C., et al., *PRISMA Extension for Scoping Reviews (PRISMA-ScR): Checklist and Explanation*. Ann Intern Med, 2018. **169**(7): p. 467-473.
41. WorldBank. *High income countries*. 2021 [05-08-2021]; Available from: <https://data.worldbank.org/country/XD>.
42. Ouzzani, M., et al., *Rayyan—a web and mobile app for systematic reviews*. Systematic Reviews, 2016. **5**(1): p. 210.
43. Bentley, M., et al., *Interprofessional teamwork in comprehensive primary healthcare services: Findings from a mixed methods study*. Journal of interprofessional care, 2018. **32**(3): p. 274-283.
44. Berkowitz, S.A., et al., *Case Study: Johns Hopkins Community Health Partnership: A model for transformation*. Healthcare (Amsterdam, Netherlands), 2016. **4**(4): p. 264-270.
45. Chan, B.C., et al., *Finding common ground? Evaluating an intervention to improve teamwork among primary health-care professionals*. International journal for quality in health care : journal of the International Society for Quality in Health Care, 2010. **22**(6): p. 519-524.
46. Coleman, M.T., et al., *Interprofessional ambulatory primary care practice-based educational program*. Journal of interprofessional care, 2008. **22**(1): p. 69-84.
47. Curran, V., J. Sargeant, and A. Hollett, *Evaluation of an interprofessional continuing professional development initiative in primary health care*. Journal of Continuing Education in the Health Professions, 2007. **27**(4): p. 241-252.
48. Goldman, J., et al., *Interprofessional primary care protocols: a strategy to promote an evidence-based approach to teamwork and the delivery of care*. J Interprof Care, 2010. **24**(6): p. 653-65.
49. Grace, S.M., et al., *Flexible implementation and integration of new team members to support patient-centered care*. Healthc (Amst), 2014. **2**(2): p. 145-51.
50. Hilts, L., et al., *Helping primary care teams emerge through a quality improvement program*. Family Practice, 2013. **30**(2): p. 204-211.
51. Josi, R., M. Bianchi, and S.K. Brandt, *Advanced practice nurses in primary care in Switzerland: an analysis of interprofessional collaboration*. BMC nursing, 2020. **19**: p. 1.
52. Kim, L.Y., et al., *What makes team communication effective: a qualitative analysis of interprofessional primary care team members' perspectives*. J Interprof Care, 2019. **33**(6): p. 836-838.
53. Kotecha, J., et al., *Influence of a quality improvement learning collaborative program on team functioning in primary healthcare*. Families, systems & health : the journal of collaborative family healthcare, 2015. **33**(3): p. 222-230.
54. Legare, F., et al., *Validating a conceptual model for an inter-professional approach to shared decision making: a mixed methods study*. J Eval Clin Pract, 2011. **17**(4): p. 554-64.
55. Lockhart, E., et al., *Engaging primary care physicians in care coordination for patients with complex medical conditions*. Canadian Family Physician, 2019. **65**(4): p. E155-E162.
56. MacNaughton, K., S. Chreim, and I.L. Bourgeault, *Role construction and boundaries in interprofessional primary health care teams: a qualitative study*. BMC health services research, 2013. **13**: p. 486.
57. Mahmood-Yousuf, K., et al., *Interprofessional relationships and communication in primary palliative care: impact of the Gold Standards Framework*. The British journal of general practice : the journal of the Royal College of General Practitioners, 2008. **58**(549): p. 256-263.
58. Morgan, S., S. Pullon, and E. McKinlay, *Observation of interprofessional collaborative practice in primary care teams: An integrative literature review*. International journal of nursing studies, 2015. **52**(7): p. 1217-1230.

- 1
  - 2
  - 3
  - 4
  - 5
  - 6
  - 7
  - 8
  - 9
  - 10
  - 11
  - 12
  - 13
  - 14
  - 15
  - 16
  - 17
  - 18
  - 19
  - 20
  - 21
  - 22
  - 23
  - 24
  - 25
  - 26
  - 27
  - 28
  - 29
  - 30
  - 31
  - 32
  - 33
  - 34
  - 35
  - 36
  - 37
  - 38
  - 39
  - 40
  - 41
  - 42
  - 43
  - 44
  - 45
  - 46
  - 47
  - 48
  - 49
  - 50
  - 51
  - 52
  - 53
  - 54
  - 55
  - 56
  - 57
  - 58
  - 59
  - 60
59. Morgan, S., et al., *Collaborative Care in Primary Care: The Influence of Practice Interior Architecture on Informal Face-to-Face Communication—An Observational Study*. HERD: Health Environments Research & Design Journal, 2020. **14**(1): p. 190-209.
60. Murphy, B., et al., *Change in mental health collaborative care attitudes and practice in Australia Impact of participation in MHPN network meetings*. Journal of Integrated Care, 2018. **26**(1): p. 29-37.
61. Pullon, S., et al., *Observation of interprofessional collaboration in primary care practice: A multiple case study*. Journal of interprofessional care, 2016. **30**(6): p. 787-794.
62. Reay, T., et al., *Legitimizing new practices in primary health care*. Health Care Manage Rev, 2013. **38**(1): p. 9-19.
63. Reeves, S., et al., *Interprofessional collaboration to improve professional practice and healthcare outcomes*. Cochrane Database Syst Rev, 2017. **6**(6): p. Cd000072.
64. Robben, S., et al., *Impact of interprofessional education on collaboration attitudes, skills, and behavior among primary care professionals*. The Journal of continuing education in the health professions, 2012. **32**(3): p. 196-204.
65. Rodriguez, C. and M. Pozzebon, *The implementation evaluation of primary care groups of practice: a focus on organizational identity*. BMC Fam Pract, 2010. **11**: p. 15.
66. Rodriguez, H.P., et al., *Availability of primary care team members can improve teamwork and readiness for change*. Health care management review, 2016. **41**(4): p. 286-295.
67. Russell, G.M., et al., *Contextual levers for team-based primary care: lessons from reform interventions in five jurisdictions in three countries*. Family Practice, 2018. **35**(3): p. 276-284.
68. Sargeant, J., E. Loney, and G. Murphy, *Effective interprofessional teams: "contact is not enough" to build a team*. The Journal of continuing education in the health professions, 2008. **28**(4): p. 228-234.
69. Tierney, E., et al., *Interdisciplinary team working in the Irish primary healthcare system: Analysis of 'invisible' bottom up innovations using Normalisation Process Theory*. Health Policy, 2019. **123**(11): p. 1083-1092.
70. Valaitis, R., et al., *Examining Interprofessional teams structures and processes in the implementation of a primary care intervention (Health TAPESTRY) for older adults using normalization process theory*. BMC Family Practice, 2020. **21**(1): p. 14.
71. van Dongen, J.J.J., et al., *Suitability of a Programme for Improving Interprofessional Primary Care Team Meetings*. International journal of integrated care, 2018. **18**(4): p. 12-12.
72. van Dongen, J.J.J., et al., *Development of a Customizable Programme for Improving Interprofessional Team Meetings: An Action Research Approach*. Int J Integr Care, 2018. **18**(1): p. 8.
73. van Dongen, J.J., et al., *Interprofessional collaboration regarding patients' care plans in primary care: a focus group study into influential factors*. BMC Fam Pract, 2016. **17**: p. 58.
74. Wener, P. and R.L. Woodgate, *Collaborating in the context of co-location: a grounded theory study*. BMC family practice, 2016. **17**: p. 30.
75. Wilcock, P.M., C. Champion-Smith, and M. Head, *The Dorset Seedcorn Project: interprofessional learning and continuous quality improvement in primary care*. British Journal of General Practice, 2002. **52**: p. S39-S44.
76. Young, J., et al., *Shared care requires a shared vision: communities of clinical practice in a primary care setting*. Journal of Clinical Nursing, 2017. **26**(17): p. 2689-2702.
77. Ruth Mingli, Z., S. Yu Fan, and K. Gerald Choon-Huat, *Attitudes towards interprofessional collaboration among primary care physicians and nurses in Singapore*. Journal of Interprofessional Care. **30**(4): p. 505-511.
78. Lavelle, M., et al., *An evidence based framework for the Temporal Observational Analysis of Teamwork in healthcare settings*. Appl Ergon, 2020. **82**: p. 102915.
79. Anderson, J., M. Lavelle, and G. Reedy, *Understanding adaptive teamwork in health care: Progress and future directions*. Journal of Health Services Research & Policy, 2020. **26**: p. 135581962097843.

- 1
  - 2
  - 3
  - 4
  - 5
  - 6
  - 7
  - 8
  - 9
  - 10
  - 11
  - 12
  - 13
  - 14
  - 15
  - 16
  - 17
  - 18
  - 19
  - 20
  - 21
  - 22
  - 23
  - 24
  - 25
  - 26
  - 27
  - 28
  - 29
  - 30
  - 31
  - 32
  - 33
  - 34
  - 35
  - 36
  - 37
  - 38
  - 39
  - 40
  - 41
  - 42
  - 43
  - 44
  - 45
  - 46
  - 47
  - 48
  - 49
  - 50
  - 51
  - 52
  - 53
  - 54
  - 55
  - 56
  - 57
  - 58
  - 59
  - 60
80. Braithwaite, J., et al., *The basis of clinical tribalism, hierarchy and stereotyping: a laboratory-controlled teamwork experiment*. *BMJ Open*, 2016. **6**(7): p. e012467.
81. McInnes, S., et al., *An integrative review of facilitators and barriers influencing collaboration and teamwork between general practitioners and nurses working in general practice*. *Journal of Advanced Nursing*, 2015. **71**(9): p. 1973-1985.
82. Liedvogel, M., E. Haesler, and K. Anderson, *Who will be running your practice in 10 years?: Supporting GP registrars' awareness and knowledge of practice ownership*. *Australian family physician*, 2013. **42**(5): p. 333-336.
83. Lockwood, A. and F. Maguire, *General Practitioners and Nurses Collaborating in General Practice*. *Australian Journal of Primary Health*, 2000. **6**: p. 19-29.
84. Kim, S., H. Lee, and T.P. Connerton, *How psychological safety affects team performance: mediating role of efficacy and learning behavior*. *Frontiers in psychology*, 2020. **11**: p. 1581.
85. Edmondson, A., *Psychological safety and learning behavior in work teams*. *Administrative science quarterly*, 1999. **44**(2): p. 350-383.
86. Frazier, M.L., et al., *Psychological Safety: A Meta-Analytic Review and Extension*. *Personnel Psychology*, 2017. **70**(1): p. 113-165.
87. Vardaman, J.M., et al., *Beyond communication: the role of standardized protocols in a changing health care environment*. *Health Care Manage Rev*, 2012. **37**(1): p. 88-97.
88. Burm, S., et al., *Recognising the importance of informal communication events in improving collaborative care*. *BMJ Quality & Safety*, 2019. **28**(4): p. 289-295.
89. Fox, S., et al., *Communication and Interprofessional Collaboration in Primary Care: From Ideal to Reality in Practice*. *Health Communication*, 2021. **36**(2): p. 125-135.
90. Persson, S.S., K. Blomqvist, and P.N. Lindström, *Meetings are an Important Prerequisite for Flourishing Workplace Relationships*. *International Journal of Environmental Research and Public Health*, 2021. **18**(15): p. 8092.
91. Bomhof-Roordink, H., et al., *Shared decision making in oncology: A model based on patients', health care professionals', and researchers' views*. *Psycho-Oncology*, 2019. **28**(1): p. 139-146.
92. Elwyn, G., et al., *Shared decision making: a model for clinical practice*. *Journal of general internal medicine*, 2012. **27**(10): p. 1361-1367.
93. Müller, M., et al., *Impact of the communication and patient hand-off tool SBAR on patient safety: a systematic review*. *BMJ Open*, 2018. **8**(8): p. e022202.
94. Lo, L., L. Rotteau, and K. Shojania, *Can SBAR be implemented with high fidelity and does it improve communication between healthcare workers? A systematic review*. *BMJ Open*, 2021. **11**(12): p. e055247.
95. Solomon, D.H. and R.S. Rudin, *Digital health technologies: opportunities and challenges in rheumatology*. *Nature Reviews Rheumatology*, 2020. **16**(9): p. 525-535.
96. Fagherazzi, G., et al., *Digital health strategies to fight COVID-19 worldwide: challenges, recommendations, and a call for papers*. *Journal of Medical Internet Research*, 2020. **22**(6): p. e19284.
97. Rasin-Waters, D., et al., *The Integrated Care Team Approach of the Department of Veterans Affairs (VA): Geriatric Primary Care*. *Archives of Clinical Neuropsychology*, 2018. **33**(3): p. 280-289.
98. Friedman, E.M. and P.K. Tong, *A Framework for Integrating Family Caregivers into the Health Care Team*. 2020, Santa Monica, CA: RAND Corporation.
99. Ugalde, A., et al., *Effective integration of caregivers and families as part of the care team for people with cancer*. *Australian Journal for General Practitioners*, 2021. **50**: p. 527-531.
100. Zierler, B.K., et al., *An interprofessional collaborative practice approach to transform heart failure care: An overview*. *Journal of Interprofessional Care*, 2018. **32**(3): p. 378-381.
101. Nagelkerk, J., et al., *Improving outcomes in adults with diabetes through an interprofessional collaborative practice program*. *Journal of Interprofessional Care*, 2018. **32**(1): p. 4-13.

- 1  
2  
3 102. Pascucci, D., et al., *Impact of interprofessional collaboration on chronic disease management: findings from a systematic review of clinical trial and meta-analysis*. Health Policy, 2021.  
4  
5 **125**(2): p. 191-202.  
6  
7  
8  
9  
10  
11  
12  
13  
14  
15  
16  
17  
18  
19  
20  
21  
22  
23  
24  
25  
26  
27  
28  
29  
30  
31  
32  
33  
34  
35  
36  
37  
38  
39  
40  
41  
42  
43  
44  
45  
46  
47  
48  
49  
50  
51  
52  
53  
54  
55  
56  
57  
58  
59  
60

For peer review only



Records identified through database search in Pubmed, Medline, Eric, and Web of Science (n = 1,816)

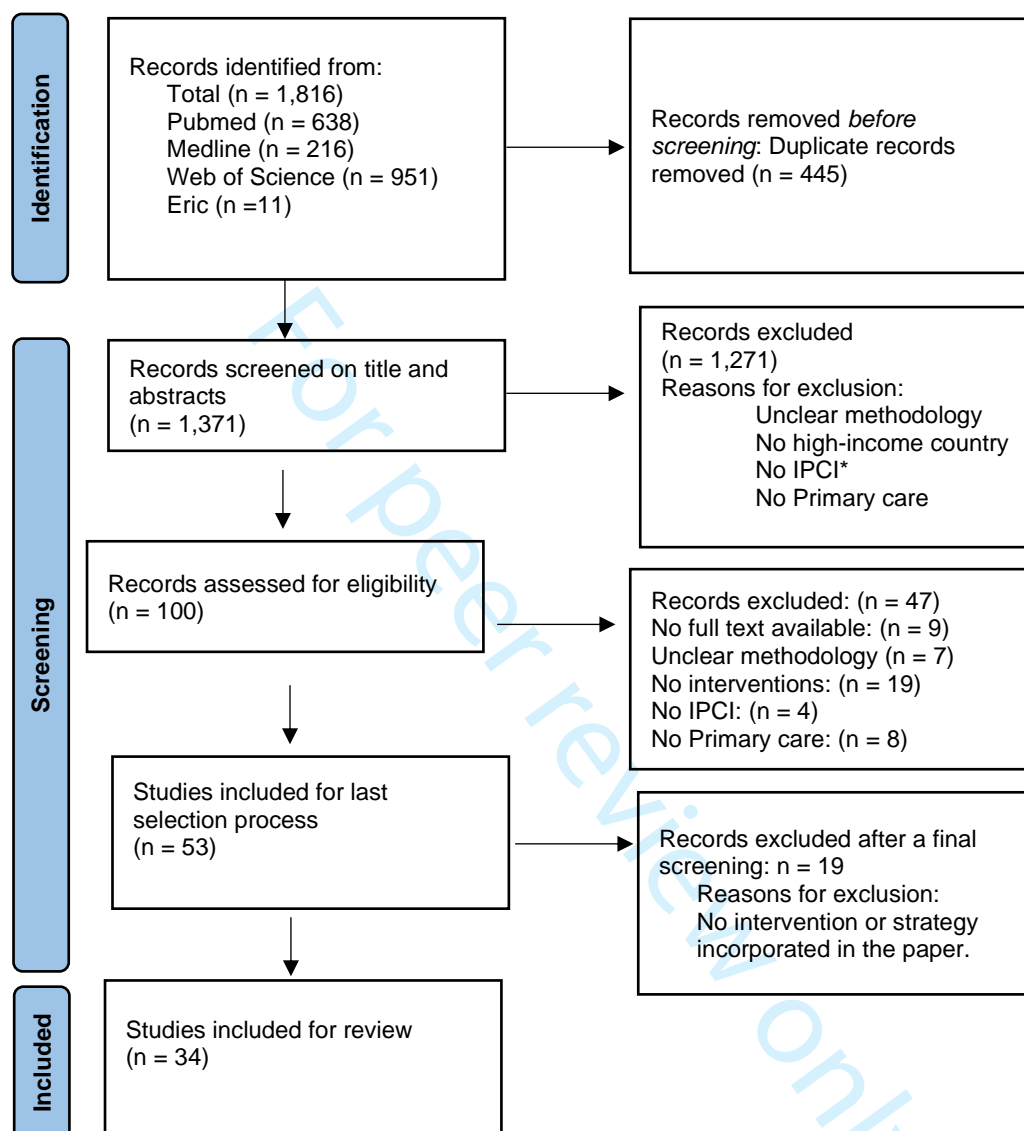

Figure 1: PRISMA flow diagram. PRISMA, Preferred Reporting Items for Scoping reviews (\*IPCI= Interprofessional collaboration or integration)

## Preferred Reporting Items for Systematic reviews and Meta-Analyses extension for Scoping Reviews (PRISMA-ScR) Checklist

| SECTION                                               | ITEM | PRISMA-ScR CHECKLIST ITEM                                                                                                                                                                                                                                                                                  | REPORTED ON PAGE #   |
|-------------------------------------------------------|------|------------------------------------------------------------------------------------------------------------------------------------------------------------------------------------------------------------------------------------------------------------------------------------------------------------|----------------------|
| <b>TITLE</b>                                          |      |                                                                                                                                                                                                                                                                                                            |                      |
| Title                                                 | 1    | Identify the report as a scoping review.                                                                                                                                                                                                                                                                   | 1                    |
| <b>ABSTRACT</b>                                       |      |                                                                                                                                                                                                                                                                                                            |                      |
| Structured summary                                    | 2    | Provide a structured summary that includes (as applicable): background, objectives, eligibility criteria, sources of evidence, charting methods, results, and conclusions that relate to the review questions and objectives.                                                                              | 1,2                  |
| <b>INTRODUCTION</b>                                   |      |                                                                                                                                                                                                                                                                                                            |                      |
| Rationale                                             | 3    | Describe the rationale for the review in the context of what is already known. Explain why the review questions/objectives lend themselves to a scoping review approach.                                                                                                                                   | 2 and 3              |
| Objectives                                            | 4    | Provide an explicit statement of the questions and objectives being addressed with reference to their key elements (e.g., population or participants, concepts, and context) or other relevant key elements used to conceptualize the review questions and/or objectives.                                  | 2 and 3              |
| <b>METHODS</b>                                        |      |                                                                                                                                                                                                                                                                                                            |                      |
| Protocol and registration                             | 5    | Indicate whether a review protocol exists; state if and where it can be accessed (e.g., a Web address); and if available, provide registration information, including the registration number.                                                                                                             | /                    |
| Eligibility criteria                                  | 6    | Specify characteristics of the sources of evidence used as eligibility criteria (e.g., years considered, language, and publication status), and provide a rationale.                                                                                                                                       | 5                    |
| Information sources*                                  | 7    | Describe all information sources in the search (e.g., databases with dates of coverage and contact with authors to identify additional sources), as well as the date the most recent search was executed.                                                                                                  | 4,5                  |
| Search                                                | 8    | Present the full electronic search strategy for at least 1 database, including any limits used, such that it could be repeated.                                                                                                                                                                            | 3 and 4 + table 1    |
| Selection of sources of evidence†                     | 9    | State the process for selecting sources of evidence (i.e., screening and eligibility) included in the scoping review.                                                                                                                                                                                      | 3 and 4              |
| Data charting process‡                                | 10   | Describe the methods of charting data from the included sources of evidence (e.g., calibrated forms or forms that have been tested by the team before their use, and whether data charting was done independently or in duplicate) and any processes for obtaining and confirming data from investigators. | 5                    |
| Data items                                            | 11   | List and define all variables for which data were sought and any assumptions and simplifications made.                                                                                                                                                                                                     | 3-5                  |
| Critical appraisal of individual sources of evidence§ | 12   | If done, provide a rationale for conducting a critical appraisal of included sources of evidence; describe the methods used and how this information was used in any data synthesis (if appropriate).                                                                                                      | Not required for ScR |



| SECTION                                       | ITEM | PRISMA-ScR CHECKLIST ITEM                                                                                                                                                                       | REPORTED ON PAGE #     |
|-----------------------------------------------|------|-------------------------------------------------------------------------------------------------------------------------------------------------------------------------------------------------|------------------------|
| Synthesis of results                          | 13   | Describe the methods of handling and summarizing the data that were charted.                                                                                                                    | 4, 5                   |
| <b>RESULTS</b>                                |      |                                                                                                                                                                                                 |                        |
| Selection of sources of evidence              | 14   | Give numbers of sources of evidence screened, assessed for eligibility, and included in the review, with reasons for exclusions at each stage, ideally using a flow diagram.                    | 5, 6, and figure 1     |
| Characteristics of sources of evidence        | 15   | For each source of evidence, present characteristics for which data were charted and provide the citations.                                                                                     | 5, table 2             |
| Critical appraisal within sources of evidence | 16   | If done, present data on critical appraisal of included sources of evidence (see item 12).                                                                                                      | /                      |
| Results of individual sources of evidence     | 17   | For each included source of evidence, present the relevant data that were charted that relate to the review questions and objectives.                                                           | 6 – 10 + table 2 and 4 |
| Synthesis of results                          | 18   | Summarize and/or present the charting results as they relate to the review questions and objectives.                                                                                            | 10-13                  |
| <b>DISCUSSION</b>                             |      |                                                                                                                                                                                                 |                        |
| Summary of evidence                           | 19   | Summarize the main results (including an overview of concepts, themes, and types of evidence available), link to the review questions and objectives, and consider the relevance to key groups. | 13 and 14              |
| Limitations                                   | 20   | Discuss the limitations of the scoping review process.                                                                                                                                          | 14 and 15              |
| Conclusions                                   | 21   | Provide a general interpretation of the results with respect to the review questions and objectives, as well as potential implications and/or next steps.                                       | 15                     |
| <b>FUNDING</b>                                |      |                                                                                                                                                                                                 |                        |
| Funding                                       | 22   | Describe sources of funding for the included sources of evidence, as well as sources of funding for the scoping review. Describe the role of the funders of the scoping review.                 | 15                     |

JBI = Joanna Briggs Institute; PRISMA-ScR = Preferred Reporting Items for Systematic reviews and Meta-Analyses extension for Scoping Reviews.

\* Where *sources of evidence* (see second footnote) are compiled from, such as bibliographic databases, social media platforms, and Web sites.

† A more inclusive/heterogeneous term used to account for the different types of evidence or data sources (e.g., quantitative and/or qualitative research, expert opinion, and policy documents) that may be eligible in a scoping review as opposed to only studies. This is not to be confused with *information sources* (see first footnote).

‡ The frameworks by Arksey and O'Malley (6) and Levac and colleagues (7) and the JBI guidance (4, 5) refer to the process of data extraction in a scoping review as data charting.

§ The process of systematically examining research evidence to assess its validity, results, and relevance before using it to inform a decision. This term is used for items 12 and 19 instead of "risk of bias" (which is more applicable to systematic reviews of interventions) to include and acknowledge the various sources of evidence that may be used in a scoping review (e.g., quantitative and/or qualitative research, expert opinion, and policy document).

From: Tricco AC, Lillie E, Zarin W, O'Brien KK, Colquhoun H, Levac D, et al. PRISMA Extension for Scoping Reviews (PRISMA-ScR): Checklist and Explanation. *Ann Intern Med.* 2018;169:467–473. doi: 10.7326/M18-0850.

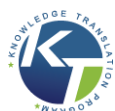

St. Michael's

Inspired Care.  
Inspiring Science.

For peer review only - <http://bmjopen.bmj.com/site/about/guidelines.xhtml>



# BMJ Open

## A scoping review to identify strategies and interventions improving interprofessional collaboration and integration in primary care

|                                 |                                                                                                                                                                                                                                                                                                                                                                                                                                                          |
|---------------------------------|----------------------------------------------------------------------------------------------------------------------------------------------------------------------------------------------------------------------------------------------------------------------------------------------------------------------------------------------------------------------------------------------------------------------------------------------------------|
| Journal:                        | <i>BMJ Open</i>                                                                                                                                                                                                                                                                                                                                                                                                                                          |
| Manuscript ID                   | bmjopen-2022-062111.R2                                                                                                                                                                                                                                                                                                                                                                                                                                   |
| Article Type:                   | Original research                                                                                                                                                                                                                                                                                                                                                                                                                                        |
| Date Submitted by the Author:   | 15-Sep-2022                                                                                                                                                                                                                                                                                                                                                                                                                                              |
| Complete List of Authors:       | Sirimsi, Muhammed Mustafa; University of Antwerp, Center for General Practice<br>De Loof, Hans; University of Antwerp, Pharmaceutical sciences<br>Van den Broeck, Kris; University of Antwerp, Department of General Practice<br>De Vliegheer, Kristel; Wit-Gele Kruis van Vlaanderen<br>Pype, Peter; Univ Ghent,<br>Remmen, Roy; University of Antwerp, Primary and interdisciplinary care van Bogaert, Peter; Universiteit Antwerpen Campus Drie Eiken |
| <b>Primary Subject Heading</b>: | Health services research                                                                                                                                                                                                                                                                                                                                                                                                                                 |
| Secondary Subject Heading:      | Public health, Health policy, General practice / Family practice, Mental health, Patient-centred medicine                                                                                                                                                                                                                                                                                                                                                |
| Keywords:                       | PRIMARY CARE, Organisation of health services < HEALTH SERVICES ADMINISTRATION & MANAGEMENT, PUBLIC HEALTH, Protocols & guidelines < HEALTH SERVICES ADMINISTRATION & MANAGEMENT, Quality in health care < HEALTH SERVICES ADMINISTRATION & MANAGEMENT                                                                                                                                                                                                   |
|                                 |                                                                                                                                                                                                                                                                                                                                                                                                                                                          |

SCHOLARONE™  
Manuscripts



I, the Submitting Author has the right to grant and does grant on behalf of all authors of the Work (as defined in the below author licence), an exclusive licence and/or a non-exclusive licence for contributions from authors who are: i) UK Crown employees; ii) where BMJ has agreed a CC-BY licence shall apply, and/or iii) in accordance with the terms applicable for US Federal Government officers or employees acting as part of their official duties; on a worldwide, perpetual, irrevocable, royalty-free basis to BMJ Publishing Group Ltd ("BMJ") its licensees and where the relevant Journal is co-owned by BMJ to the co-owners of the Journal, to publish the Work in this journal and any other BMJ products and to exploit all rights, as set out in our [licence](#).

The Submitting Author accepts and understands that any supply made under these terms is made by BMJ to the Submitting Author unless you are acting as an employee on behalf of your employer or a postgraduate student of an affiliated institution which is paying any applicable article publishing charge ("APC") for Open Access articles. Where the Submitting Author wishes to make the Work available on an Open Access basis (and intends to pay the relevant APC), the terms of reuse of such Open Access shall be governed by a Creative Commons licence – details of these licences and which [Creative Commons](#) licence will apply to this Work are set out in our licence referred to above.

Other than as permitted in any relevant BMJ Author's Self Archiving Policies, I confirm this Work has not been accepted for publication elsewhere, is not being considered for publication elsewhere and does not duplicate material already published. I confirm all authors consent to publication of this Work and authorise the granting of this licence.

Title: A scoping review to identify strategies and interventions improving interprofessional collaboration and integration in primary care

*Authors: Muhammed Mustafa Sirimsi<sup>1,2</sup>, Hans De Loof<sup>3</sup>, Kris Van Den Broeck<sup>2</sup>, Kristel De Vlieghe<sup>4</sup>, Peter Pype<sup>5,6</sup>, Roy Remmen<sup>2</sup>, Peter Van Bogaert<sup>1</sup>*

*Affiliations:*

<sup>1</sup>Centre for research and innovation in care (CRIC), Faculty of Medicine and Health Sciences. University of Antwerp. Antwerp. Belgium

<sup>2</sup>Family Medicine and Population Health (FAMPOP), Faculty of Medicine and Health Sciences. University of Antwerp. Antwerp. Belgium

<sup>3</sup>Laboratory of Physiopharmacology, Faculty of pharmaceutical sciences, University of Antwerp, Antwerp, Belgium

<sup>4</sup>White-Yellow Cross of Flanders, Brussels, Belgium

<sup>5</sup>Center for family medicine, Department of Public Health and Primary Care, Faculty of Medicine and Health Sciences, Ghent University, Ghent, Belgium

<sup>6</sup>End-of-Life Care Research Group, Vrije Universiteit Brussel and Ghent University, Ghent, Belgium

*Corresponding author: Muhammed Mustafa Sirimsi*

*E-mail authors: [muhammedmustafa.sirimsi@uantwerpen.be](mailto:muhammedmustafa.sirimsi@uantwerpen.be); [Hans.deloo@uantwerpen.be](mailto:Hans.deloo@uantwerpen.be); [Kris.vandenbroeck@uantwerpen.be](mailto:Kris.vandenbroeck@uantwerpen.be); [Kristel.de.vlieghe@vlaanderen.wgk.be](mailto:Kristel.de.vlieghe@vlaanderen.wgk.be); [peter.pype@ugent.be](mailto:peter.pype@ugent.be); [roy.remmen@uantwerpen.be](mailto:roy.remmen@uantwerpen.be); [peter.vanbogaert@uantwerpen.be](mailto:peter.vanbogaert@uantwerpen.be)*

## Abstract

**Objective:** To identify strategies and interventions used to improve interprofessional collaboration and integration in primary care.

**Design:** Scoping review

**Data Sources:** Specific Medical Subject Headings (MeSH-terms) were used, and a search strategy was developed for Pubmed and afterwards adapted to Medline, Eric, and Web of Science.

**Study selection:** In the first stage of the selection, two researchers screened the article abstracts to select eligible papers. When decisions conflicted, three other researchers joined the decision-making process. The same strategy was used with full-text screening. Articles were included if they: (i) were in English, (ii) described an intervention to improve interprofessional collaboration or integration (IPCI) in primary care involving at least two different healthcare disciplines, (iii) originated from a high-income country, (iv) were peer-reviewed; and (v) were published between 2001 and 2020.

**Data extraction and synthesis:** From each paper, eligible data were extracted, and the selected papers were analysed inductively. Studying the main focus of the papers, researchers searched for common patterns in answering the research question and exposing research gaps. The identified themes were discussed and adjusted until a consensus was reached among all authors.

**Results:** The literature search yielded a total of 1816 papers. After removing duplicates, screening titles, and abstracts, and performing full-text readings, 34 papers were incorporated in this scoping review. The identified strategies and interventions were inductively categorized under five main themes; (i) Acceptance and team readiness towards collaboration, (ii) acting as a team and not as an individual; (iii) communication strategies and shared decision making, (iv) coordination in primary care, and (v) integration of caregivers and their skills and competences.

**Conclusions:** We identified a mix of strategies and interventions that can function as 'building blocks', for the development of a generic intervention to improve collaboration in different types of primary care settings and organisations.

### Strengths and limitations of this study

- The review focuses exclusively on primary care; thus, our findings are not directly transferable to other healthcare levels.
- Only articles written in English were included. Therefore we may have missed valuable literature.
- Only studies performed in high-income countries were included in this review; hence, our findings are not directly transferable to other countries because differences in health systems, financing, governance, title protection and culture can pose significant implementation challenges.
- The risk of bias to the interpretation of the data was minimised by triangulating researchers from different backgrounds (e.g. nurses, pharmacists and a psychologist) throughout the whole review process and conducting the selection of articles with a team of at least two researchers.
- We did not limit the search to the collaboration between specific types of caregivers, or in relation to a specific disease, or condition of patients. Therefore, our data and analysis can be used in the context of or added to a broad scope of interprofessional collaboration and integration in primary care.

## Introduction

As the world population is ageing, the growing complexity of health care and health needs, together with the associated financial challenges<sup>[1]</sup> and the fragmentation of primary care,<sup>[2-4]</sup> are prompting a fundamental rethink of how primary care should be organised and how professionals in different settings should collaborate.<sup>[5]</sup> As approximately one-third of the world population lives with a chronic disease,<sup>[6]</sup> and as primary care is usually the first point of access to the care system, integrated care at that level in which professionals closely collaborate, both interdisciplinary and interprofessional, is unquestionably important in current and future care organisations.

Interprofessional collaboration can be beneficial to achieving a more integrated primary health care and should overcome the aforementioned challenges and problems. According to the World Health Organisation, interprofessional collaboration occurs when two or more professions work together to achieve common goals.<sup>[7]</sup> Orchard et al.<sup>[8]</sup> defines it as involving a partnership between a team of health professionals and a client in a participatory, collaborative and coordinated approach to shared decision-making around health and social

1  
2  
3 issues. As Goodwin et al.<sup>[9]</sup> and Lewis et al.<sup>[10]</sup> see an efficient interprofessional collaboration  
4 as a prerequisite for integrated care, Edmondson et al.<sup>[11]</sup> indicated that psychological safety,  
5 defined as a shared belief that the team is safe for interpersonal risk-taking, is a critical  
6 factor in understanding teamwork and organisational learning.  
7

8  
9 Next to health professionals, informal caregivers are involved in interprofessional  
10 collaboration.<sup>[12]</sup> According to the World Health Organisation,<sup>[13]</sup> informal caregivers should  
11 be considered full partners in care and they mostly consist of families and friends of the  
12 patient. To measure the collaboration and coordination of these formal and informal  
13 caregivers many questionnaires are available.<sup>[14]</sup> The assessment of interprofessional team  
14 collaboration scale (AITCS) is an example consisting of the subscales; partnership,  
15 cooperation and coordination, and can be deployed in primary healthcare.<sup>[15]</sup>  
16

17  
18 To achieve and maintain interprofessional collaboration in primary care, Bardet et al.<sup>[16]</sup>  
19 identified the following key elements: trust, interdependence, perceptions and expectations  
20 from the other health care professionals, their skills, their interest for collaborative practice,  
21 their role definition and their communication.<sup>[17-23]</sup> These key elements are also present in  
22 the five dimensions of integrated care that Valentijn et al.<sup>[24, 25]</sup> described in the Rainbow  
23 model as follows: system, organisational, professional, clinical, functional, and normative  
24 integration. Integrated care and quality collaboration between professionals leads to  
25 improved access to care<sup>[26]</sup>, better health outcomes<sup>[27]</sup>, and enhanced prevention.<sup>[28, 29]</sup>  
26  
27

28  
29 Although several literature reviews identified strategies to influence, improve or facilitate  
30 interprofessional collaboration, a thorough analysis of the interventions is lacking. Most  
31 review papers focused on the collaboration of a single type of caregiver or one specific  
32 disease.<sup>[27, 30-38]</sup> Therefore, it is difficult to broaden these findings to primary care and  
33 chronic conditions in general.  
34

35  
36 To fill this gap, we performed a scoping review to identify strategies and interventions  
37 improving and/or facilitating interprofessional collaboration and integration (IPCI) in primary  
38 care. More specifically, we listed and analysed the existing strategies, interventions and their  
39 outcomes, without focussing on a specific profession or disease. Based on the definitions of  
40 interprofessional collaboration<sup>[7, 8]</sup> and integrated care<sup>[9, 10, 24, 25]</sup>, we included papers, thus  
41 outlining strategies and interventions working on micro, meso and macro-level. The included  
42 papers described organisational, relational and processual factors influenced by these  
43 interventions and strategies.  
44

45  
46 This review was conducted as the first phase of a research project to develop an evidence-  
47 based toolkit, guiding health professionals in their transition towards IPCI of different  
48 competencies, skills and roles as well as the role of patients and their needs in primary care.  
49  
50  
51  
52  
53  
54  
55  
56  
57  
58  
59  
60

## Methods

We conducted a scoping review using the Arksey and O'Malley framework<sup>[39]</sup>: (i) identifying the research questions, (ii) identifying relevant studies, (iii) selecting studies, (iv) charting the data and (v) collating, summarising and reporting results. We used the PRISMA-ScR guidelines and the PRISMA-ScR templates to help conduct the scoping review<sup>[40]</sup>.

### Step 1: Identifying the research questions

An exploratory literature search was performed preliminarily to identifying the research question on IPCI in primary care. Based on this literature search, we developed the following research question: Which strategies and/or interventions improve or facilitate interprofessional collaboration and integration in primary care? We aimed to search for articles containing generic strategies and methods used in primary care settings, to facilitate IPCI in primary care. Five researchers were involved in identifying this research question for the scoping review.

### Step 2: Identifying relevant studies: search strategy

We used specific Medical Subject Headings (MeSH-terms) and free text terms to design a search strategy around the following key concepts: primary care, health care team, integration and interprofessional collaboration. We combined the keywords and MeSH terms presented in Table 1 with the Boolean terms 'OR', 'AND' and 'NOT'. The search strategy was developed for Pubmed and afterwards adapted to Medline, Eric and Web of Science, and was performed between March and June 2020. The full search strategy is available in the supplementary material.

| MeSh/search terms and combinations for Pubmed                                                |
|----------------------------------------------------------------------------------------------|
| 1. primary care                                                                              |
| 2. primary healthcare                                                                        |
| 3. primary health care                                                                       |
| 1 or 2 or 3 (Title/abstract)                                                                 |
| 5. integrative team                                                                          |
| 6. integrative teams                                                                         |
| 7. collaborative practice                                                                    |
| 8. collaborative practices                                                                   |
| 9. interdisciplinary team                                                                    |
| 10. interdisciplinary teams                                                                  |
| 11. multidisciplinary team                                                                   |
| 12. multidisciplinary teams                                                                  |
| 13. interprofessional team                                                                   |
| 14. interprofessional teams                                                                  |
| 15. healthcare team                                                                          |
| 16. healthcare teams                                                                         |
| 17. health care team                                                                         |
| 18. health care teams                                                                        |
| 5 or 6 or 7 or 8 or 9 or 10 or 11 or 12 or 13 or 14 or 15 or 16 or 17 or 18 (title/abstract) |



|                                                     |
|-----------------------------------------------------|
| 20. interprofessional collaboration                 |
| 21. interprofessional teamwork                      |
| 22. interprofessional team work                     |
| 23. interdisciplinary collaboration                 |
| 24. interdisciplinary teamwork                      |
| 25. interdisciplinary team work                     |
| 26. multidisciplinary collaboration                 |
| 20 or 21 or 22 or 23 or 24 or 25 or 26 (All fields) |
| 4 AND 19 AND 27                                     |

Table 1: keywords and MeSH terms used to identify relevant data.

### Step 3: Study selection

Articles were included if they: (i) were in English, (ii) described an intervention to improve interprofessional collaboration or integration in primary care involving at least two different healthcare disciplines, (iii) originated from a high-income country,<sup>[41]</sup> (iv) were peer-reviewed and (v) were published between 2001 and 2020. Articles were excluded when: (i) the research methods and findings were not thoroughly described, (ii) it concerned opinion papers, (iii) the study focused on a single disease or group of patients/clients and (iv) when the full text was not available.

We used Rayyan<sup>[42]</sup> to collect and organise eligible articles. In the first stage of the selection, MMS and PVB screened the article abstracts to select eligible papers, according to the inclusion and exclusion criteria, and to eliminate the duplicates. When decisions conflicted, three other researchers (HDL, KdV, KVdB) joined the decision-making process; they were blind to the decisions of the first two reviewers, and each screened a third of the conflicting abstracts. In the second stage of the selection, the initial two reviewers read the full texts of the selected articles. As in the first stage, studies were included or excluded depending on the agreement of both reviewers. When the decisions of the two reviewers conflicted, the other researchers joined the decision-making process and a procedure similar to the one outlined above was followed.

#### 2.4. Charting the data

From each paper, eligible data were extracted using a self-developed descriptive template. The following characteristics were recorded: a full reference citation (author, title, journal and publication date); the methodology used to conduct the research; a summary of the intervention or strategy used to facilitate IPCI and the impact on IPCI.

### Step 5: Collating, summarising and reporting the data

The selected papers were analysed inductively. Studying the main focus of the papers, we searched for common patterns among them, answering the research question and/or exposing research gaps. We, thus, identified themes and subthemes, which were discussed and adjusted until consensus was reached among all authors. Subsequently, all selected papers were coded using the defined themes. Using a tabular overview and summary of the selected literature, the iterative analysis and discussion among the authors were facilitated and allowed the extraction of the interventions and strategies of interest.

### Patient and public involvement

This scoping review did not directly involve patients or public.

## Results

The literature search yielded a total of 1,816 papers, of which 445 duplicates were removed (Figure 1). Upon screening titles and abstracts of the remaining 1,371 records, only 100 were eligible given the inclusions criteria outlined above. After further reading, 47 studies, lacking an intervention, were excluded. Finally, 19 more articles were excluded because they did not include strategies or interventions. This resulted in 34 papers describing strategies and interventions to facilitate IPCI in primary care. A Flow diagram on the selection procedure is available in figure 1.

### Study characteristics

| Author and year         | Title                                                                                                                           | Journal                                                   | Country     | Study design                                                                                                             | Intervention/strategy                                                                                                                                                                                                                                               |
|-------------------------|---------------------------------------------------------------------------------------------------------------------------------|-----------------------------------------------------------|-------------|--------------------------------------------------------------------------------------------------------------------------|---------------------------------------------------------------------------------------------------------------------------------------------------------------------------------------------------------------------------------------------------------------------|
| Bentley et al. 2017     | Interprofessional teamwork in comprehensive primary healthcare services: findings from a mixed methods study                    | Journal of interprofessional care                         | Australia   | Mixed methods study. Online survey, and interviews with managers and practitioners                                       | Introduction of a comprehensive primary healthcare (CPHC) method                                                                                                                                                                                                    |
| Berkowitz et al. 2016   | Case study: Johns Hopkins community health partnership: a model for transformation                                              | The journal of delivery science and innovation            | USA         | Case study                                                                                                               | The Johns Hopkins Community Health Partnership (J-CHiP). A community-based intervention. using multidisciplinary care.                                                                                                                                              |
| Chan et al. 2010        | Finding common ground? Evaluating an intervention to improve teamwork among primary health-care professionals                   | International journal of quality in health care           | Australia   | Mixed methods study: Qualitative interviews, observations and a survey assessing multidisciplinary teamwork were used.   | A 6-month intervention (The Team-link intervention) consisting of an educational workshop and structured facilitation using specially designed materials, backed up by informal telephone support.                                                                  |
| Coleman et al. 2008     | Interprofessional ambulatory primary care practice-based educational program                                                    | Journal of interprofessional care                         | USA         | A longitudinal cohort study with a quantitative evaluation.                                                              | STAR-project: an educational program for teams of nurse practitioners, family medicine residents and social work students to work together at clinical sites in the delivery of longitudinal care in primary care ambulatory clinics.                               |
| Curran et al. 2007      | Evaluation of an interprofessional continuing professional development initiative in primary health care                        | Journal of continuing education in the health professions | Canada      | Mixed methods study: An evaluation research design, pre- to post-study with quantitative and qualitative instruments.    | Introducing The Building a Better Tomorrow Initiative (BBTI), which is a continuing professional development (CPD) program.                                                                                                                                         |
| Goldman et al. 2010     | Interprofessional primary care protocols: a strategy to promote an evidence-based approach to teamwork and the delivery of care | Journal of interprofessional care                         | Canada      | Qualitative study.                                                                                                       | Implementation of an interprofessional protocol                                                                                                                                                                                                                     |
| Grace et al. 2014       | Flexible implementation and integration of new team members to support patient-centred care                                     | The journal of delivery science and innovation            | USA         | Mixed methods: Interviews and a survey with primary care professionals.                                                  | Introduction of interprofessional primary care protocols                                                                                                                                                                                                            |
| Hilts et al. 2013       | Helping primary care teams emerge through a quality improvement program                                                         | Oxford academic: family practice                          | Canada      | A qualitative exploratory case study approach.                                                                           | Introducing a quality improvement program.                                                                                                                                                                                                                          |
| Josi et al. 2020        | Advanced practice nurses in primary care in Switzerland: an analysis of interprofessional collaboration                         | BMC nursing                                               | Switzerland | Qualitative study with an ethnographic design.                                                                           | Integration of an advanced practice nurse in a primary care team.                                                                                                                                                                                                   |
| Kim et al. 2019         | What makes team communication effective: a qualitative analysis of interprofessional primary care team members' perspectives    | Journal of interprofessional care                         | USA         | Qualitative study. Grounded theory method of constant comparison.                                                        | Standardized communication tools used with the implementation of the patient-centred medical home (PCMH)                                                                                                                                                            |
| Kotecha et al. 2015     | Influence of a quality improvement learning collaborative program on team functioning in primary healthcare                     | Journal of collaborative family healthcare                | Canada      | A qualitative study using a phenomenological approach was conducted as part of a mixed-method evaluation.                | Quality Improvement Learning Collaborative Program to support the development of interdisciplinary team function, and improve chronic disease management, disease prevention, and access to care.                                                                   |
| Légaré et al. 2020      | Validating a conceptual model for an inter-professional approach to shared decision making: a mixed methods study               | Journal of evaluation in clinical practice                | Canada      | Qualitative study. Thematic analysis of the transcripts and a descriptive analysis of the questionnaires were performed. | An interprofessional shared decision-making model.                                                                                                                                                                                                                  |
| Lockhart et al. 2019    | Engaging primary care physicians in care coordination for patients with complex medical conditions                              | Canadian family physician                                 | Canada      | Qualitative study. Care professionals were interviewed 14 to 19 months after the initiation of an intervention.          | Initiation of the Seamless Care Optimizing the Patient Experience (SCOPE) project.                                                                                                                                                                                  |
| Macnaughton et al. 2013 | Role construction and boundaries in interprofessional primary health care teams: a qualitative study                            | BMC health service research                               | Canada      | A qualitative, comparative case study with observations was conducted.                                                   | Introduction of a model to explore how roles are constructed within interprofessional health care teams. It focuses on elucidating the different types of role boundaries, the influences on role construction and the implications for professionals and patients. |

|                              |                                                                                                                                                                                       |                                                           |                |                                                                                                                                                                                                                                                            |                                                                                                                                                                                                                                                                                      |
|------------------------------|---------------------------------------------------------------------------------------------------------------------------------------------------------------------------------------|-----------------------------------------------------------|----------------|------------------------------------------------------------------------------------------------------------------------------------------------------------------------------------------------------------------------------------------------------------|--------------------------------------------------------------------------------------------------------------------------------------------------------------------------------------------------------------------------------------------------------------------------------------|
| Mahmood-Yousef et al. 2008   | Interprofessional relationships and communication in primary palliative care: impact of the gold standards framework                                                                  | The British journal of general practice                   | United-kingdom | Qualitative interview case study.                                                                                                                                                                                                                          | Adoption of an interprofessional collaboration framework to investigate the extent to which the framework influences interprofessional relationships and communication, and to compare general practitioners' and nurses' experiences.                                               |
| Morgan et al. 2015           | Observation of interprofessional collaborative practice in primary care teams: an integrative literature review                                                                       | International journal of nursing studies                  | New Zealand    | Integrative literature review                                                                                                                                                                                                                              | Several strategies to improve interprofessional collaboration in primary care teams                                                                                                                                                                                                  |
| Morgan et al. 2020           | Collaborative care in primary care: the influence of practice interior architecture on informal face-to-face communication—an observational study                                     | Health environments research & design journal             | New-Zealand    | Qualitative study with observations                                                                                                                                                                                                                        | Changing the architecture of primary care settings to explore the influence of primary care practice interior architecture on face-to-face on-the-fly communication for collaborative care.                                                                                          |
| Murphy et al. 2017           | Change in mental health collaborative care attitudes and practice in Australia impact of participation in MHPN network meetings                                                       | Journal of integrated care                                | Australia      | Quantitative study: an online survey.                                                                                                                                                                                                                      | Introduction of the Mental Health Professionals Network. Investigating attitudinal and practice changes amongst health professionals after participation in MHPN's network meetings.                                                                                                 |
| Pullon et al. 2016           | Observation of interprofessional collaboration in primary care practice: a multiple case study                                                                                        | Journal of interprofessional care                         | New-Zealand    | Qualitative study, using a case study design with observations.                                                                                                                                                                                            | Identifying existing strategies to maintain and improve interprofessional collaboration in primary care practices.                                                                                                                                                                   |
| Reay et al. 2013             | Legitimizing new practices in primary health care                                                                                                                                     | Health care management review                             | Canada         | A qualitative, longitudinal comparative case study.                                                                                                                                                                                                        | Developing effective interdisciplinary teams in primary health care.                                                                                                                                                                                                                 |
| Reeves et al. 2017           | Interprofessional collaboration to improve professional practice and healthcare outcomes                                                                                              | Cochrane review                                           | Canada         | Systematic review                                                                                                                                                                                                                                          | Nine interventions were analysed.                                                                                                                                                                                                                                                    |
| Robben et al. 2012           | Impact of interprofessional education on collaboration attitudes, skills, and behaviour among primary care professionals                                                              | Journal of continuing education in the health professions | Netherlands    | Mixed methods study: Before-after study, using the Interprofessional Attitudes Questionnaire, Attitudes Toward Health Care Teams Scale, and Team Skills Scale. Additionally, semi-structured interviews were conducted                                     | Introduction of an interprofessional education program with interdisciplinary workshops.                                                                                                                                                                                             |
| Rodriguez et al. 2010        | The implementation evaluation of primary care groups of practice: a focus on organizational identity                                                                                  | BMC family practice                                       | Canada         | Qualitative study. An in-depth longitudinal case study was conducted over two and a half years.                                                                                                                                                            | Implementation of primary care groups of practice, with a focus on the emergence of the organizational identity.                                                                                                                                                                     |
| Rodriguez et al. 2015        | Availability of primary care team members can improve teamwork and readiness for change                                                                                               | Health care management review                             | USA            | Quantitative study with a survey, using path analysis.                                                                                                                                                                                                     | A four-stage developmental interprofessional collaborative relationship-building model: To assess primary care team structure (team size, team member availability, and access to interdisciplinary expertise), teamwork, and readiness for change..                                 |
| Russell et al. 2018          | Contextual levers for team-based primary care: lessons from reform interventions in five jurisdictions in three countries                                                             | Health service research                                   | Canada         | An international consortium of researchers met via teleconference and regular face-to-face meetings using a Collaborative Reflexive Deliberative Approach to re-analyse and synthesize their published and unpublished data and their own work experience. | Determining existing strategies and methods to improve interprofessional collaboration and integration in primary care.                                                                                                                                                              |
| Sargeant et al. 2008         | Effective interprofessional teams: "contact is not enough" to build a team                                                                                                            | Journal of continuing education in the health professions | Canada         | Qualitative, grounded theory study.                                                                                                                                                                                                                        | Introducing an interprofessional educational program.                                                                                                                                                                                                                                |
| Tierney et al. 2019          | Interdisciplinary team working in the Irish primary healthcare system: analysis of 'invisible' bottom-up innovations using normalisation process theory                               | Journal of health policy                                  | Ireland        | Mixed methods study: An online survey and an interview study.                                                                                                                                                                                              | Bottom-up innovations using Normalisation Process Theory: (1)Design and delivery of educational events. in the community for preventive care and health promotion. (2)Development of integrated care plans for people with complex health needs. (3) Advocacy on behalf of patients. |
| Valaitis et al. 2020         | Examining interprofessional teams structures and processes in the implementation of a primary care intervention (health tapestry) for older adults using normalization process theory | BMC family practice                                       | Canada         | Qualitative study. Applying the NPT and a descriptive qualitative approach embedded in a mixed-methods, pragmatic RCT.                                                                                                                                     | Strengthening Quality [Health TAPESTRY] is a primary care intervention aimed at supporting older adults that involves trained volunteers, interprofessional teams, technology, and system navigation.                                                                                |
| Van Dongen et al. 2018a      | Suitability of a programme for improving interprofessional primary care team meetings                                                                                                 | International journal of integrated care                  | Netherlands    | Mixed methods study: a process evaluation using a mixed-methods approach including both qualitative and quantitative data.                                                                                                                                 | Introducing a multifaceted programme including a reflection framework, training activities and a toolbox.                                                                                                                                                                            |
| Van Dongen et al. 2016       | Interprofessional collaboration regarding patients' care plans in primary care: a focus group study into influential factors                                                          | BMC family practice                                       | Netherlands    | Qualitative study with an inductive content analysis.                                                                                                                                                                                                      | Improving interprofessional collaboration by using patients' care plans.                                                                                                                                                                                                             |
| Van dongen et al. 2018b      | Development of a customizable programme for improving interprofessional team meetings: an action research approach                                                                    | International journal of integrated care                  | Netherlands    | Qualitative study with an action research approach.                                                                                                                                                                                                        | A Customizable Programme for Improving Interprofessional Team Meetings                                                                                                                                                                                                               |
| Wener & Woodgate et al. 2016 | Collaborating in the context of co-location: a grounded theory study                                                                                                                  | BMC family practice                                       | Canada         | A qualitative research paradigm where the exploration is grounded in the providers' experiences.                                                                                                                                                           | A four-stage developmental interprofessional collaborative relationship-building model to guide health care providers and leaders as they integrate mental health services into primary care settings.                                                                               |

|                     |                                                                                                            |                                     |                |                                                                                                                                   |                                                                                                                                                                                        |
|---------------------|------------------------------------------------------------------------------------------------------------|-------------------------------------|----------------|-----------------------------------------------------------------------------------------------------------------------------------|----------------------------------------------------------------------------------------------------------------------------------------------------------------------------------------|
| Wilcock et al. 2002 | The Dorset Seedcorn project: interprofessional learning and continuous quality improvement in primary care | British journal of general practice | United Kingdom | Mixed methods study. Participants kept reflective journals. The evaluation was undertaken using a mix of questionnaires and staff | The Dorset Seedcorn Project: interprofessional learning and continuous quality improvement in primary care. Implementing the principles and methods of continuous quality improvement. |
| Young et al. 2017   | Shared care requires a shared vision: communities of clinical practice in a primary care setting           | BMC health service research         | New Zealand    | Qualitative study with observations. A focused ethnography of nine 'Communities of Clinical Practice.                             | Introducing the 'Community of Clinical Practice' (CoCP) model. Forming a vision of care which is shared by patients and the primary care professionals involved in their care.         |

Table 2: An overview of the characteristics of the selected articles.

## Findings

Five main themes, essential for IPCI, emerged from our analyses: (i) Acceptance and team readiness towards collaboration (n=21), (ii) acting as a team and not as an individual (n=26); (iii) communication strategies and shared decision making (n=16), (iv) coordination in primary care (n=20), and (v) integration of caregivers and their skills and competences (n=16). An overview of the interventions is presented in Table 2, while an overview of the articles sorted in themes is presented in Table 3.

| Articles                              | Acceptance and team readiness towards collaboration | Acting as a team and not as an individual | Communication strategies and shared decision making | Coordination in primary care | Integration of caregivers and their skills and competences |
|---------------------------------------|-----------------------------------------------------|-------------------------------------------|-----------------------------------------------------|------------------------------|------------------------------------------------------------|
| Bentley et al. <sup>[43]</sup>        |                                                     | X                                         | X                                                   | X                            |                                                            |
| Berkowitz et al. <sup>[44]</sup>      |                                                     |                                           |                                                     | X                            |                                                            |
| Chan et al. <sup>[45]</sup>           | X                                                   | X                                         |                                                     | X                            |                                                            |
| Coleman et al. <sup>[46]</sup>        | X                                                   |                                           | X                                                   | X                            |                                                            |
| Curran et al. <sup>[47]</sup>         | X                                                   | X                                         | X                                                   | X                            | X                                                          |
| Goldman et al. <sup>[48]</sup>        | X                                                   | X                                         | X                                                   |                              | X                                                          |
| Grace et al. <sup>[49]</sup>          | X                                                   | X                                         | X                                                   |                              | X                                                          |
| Hilts et al. <sup>[50]</sup>          | X                                                   | X                                         |                                                     |                              | X                                                          |
| Josi et al. <sup>[51]</sup>           |                                                     | X                                         | X                                                   |                              | X                                                          |
| Kim et al. <sup>[52]</sup>            | X                                                   |                                           | X                                                   | X                            |                                                            |
| Kotecha et al. <sup>[53]</sup>        |                                                     | X                                         | X                                                   | X                            |                                                            |
| Légaré et al. <sup>[54]</sup>         | X                                                   | X                                         | X                                                   |                              | X                                                          |
| Lockhart et al. <sup>[55]</sup>       |                                                     | X                                         |                                                     | X                            |                                                            |
| MacNaughton et al. <sup>[56]</sup>    |                                                     | X                                         |                                                     | X                            | X                                                          |
| Mahmood-Yousef et al. <sup>[57]</sup> | X                                                   |                                           | X                                                   | X                            |                                                            |
| Morgan 2015 <sup>[58]</sup>           | X                                                   | X                                         | X                                                   |                              |                                                            |
| Morgan 2020 <sup>[59]</sup>           |                                                     |                                           |                                                     | X                            |                                                            |
| Murphy et al. <sup>[60]</sup>         | X                                                   |                                           |                                                     | X                            | X                                                          |
| Pullon et al. <sup>[61]</sup>         |                                                     | X                                         |                                                     | X                            |                                                            |
| Reay et al. <sup>[62]</sup>           | X                                                   | X                                         |                                                     | X                            |                                                            |
| Reeves et al. <sup>[63]</sup>         |                                                     |                                           | X                                                   | X                            |                                                            |
| Robben et al. <sup>[64]</sup>         |                                                     | X                                         |                                                     |                              |                                                            |
| Rodriquez 2010. <sup>[65]</sup>       |                                                     |                                           |                                                     |                              | X                                                          |
| Rodriquez 2015 <sup>[66]</sup>        | X                                                   | X                                         |                                                     | X                            |                                                            |
| Russell et al. <sup>[67]</sup>        | X                                                   | X                                         |                                                     |                              | X                                                          |
| Sargeant et al. <sup>[68]</sup>       | X                                                   | X                                         |                                                     | X                            | X                                                          |
| Tierney et al. <sup>[69]</sup>        | X                                                   | x                                         | X                                                   |                              | X                                                          |
| Valaitis et al. <sup>[70]</sup>       |                                                     | X                                         |                                                     | X                            | X                                                          |
| Van Dongen 2018a <sup>[71]</sup>      | X                                                   | X                                         | X                                                   | X                            | X                                                          |

|                                  |    |    |    |    |    |
|----------------------------------|----|----|----|----|----|
| Van Dongen 2018b <sup>[72]</sup> | X  | X  | X  |    | X  |
| Van Dongen 2016 <sup>[73]</sup>  |    | X  |    |    |    |
| Wener & Woodgate <sup>[74]</sup> | X  | X  |    | X  | X  |
| Wilcock et al. <sup>[75]</sup>   | X  | X  |    |    |    |
| Young et al. <sup>[76]</sup>     | X  | X  | X  |    |    |
| # Articles                       | 21 | 26 | 16 | 20 | 16 |

Table 3: Articles sorted in themes (X= paper included under that theme)

### *Theme 1: Acceptance and team readiness towards collaboration*

Twenty-one articles provided strategies to improve the acceptance and team readiness towards collaboration.<sup>[45-50, 52, 54, 57, 58, 60, 62, 66-69, 71, 72, 74-76]</sup> Before being able to collaborate, caregivers need to accept working as a team. Team readiness towards collaboration occurs when team members obtain the right mindset to take necessary measures for efficient collaboration. This does not mean that an efficient collaboration has been reached, but both acceptance and team readiness were a prerequisite to achieving it. Acceptance and team readiness of caregivers towards collaboration were strongly influenced by their attitude, awareness, knowledge and understanding, and caregiver satisfaction.

Interventions on changing caregivers' attitudes towards collaboration seem to facilitate teamwork.<sup>[77]</sup> Workshops and information sessions were organised to make changes in caregivers' attitudes, in which advantages of teamwork and finding common ground were explained and lectured.<sup>[46, 54, 66, 67, 71, 72, 74, 76]</sup> Basic knowledge about the potential of teamwork was learned using logical explanations.<sup>[44, 46, 54, 66, 67, 71, 72, 74, 76]</sup> Caregivers to whom the advantages of collaboration were explained were more likely to accept and adopt the principles of interprofessional collaboration. Simple and accessible knowledge transfer seems to be an important characteristic of a successful intervention on the attitude and knowledge of caregivers.<sup>[45, 57, 68, 71, 72]</sup>

Some articles<sup>[46, 48, 52, 60, 71, 76]</sup> reported on strategies to increase awareness about collaboration in primary care. Increased awareness resulted in a better acceptance and team readiness towards collaboration. Making caregivers aware of their shortcomings and the need for collaboration with different disciplines seemed an effective way to facilitate interprofessional collaboration. In addition to awareness, potential improvements in care quality<sup>[46, 49, 75]</sup>, caused by better collaboration, motivate caregivers to change their attitude. Furthermore, some studies<sup>[47, 50, 58, 62, 69, 74, 75]</sup> reported that increased caregiver satisfaction was considered as a facilitator of collaboration between caregivers.

### *Theme 2: Acting as a team and not as an individual*

Twenty-six articles provided strategies to act as a team and not as an individual.<sup>[43, 45, 47-51, 53-56, 58, 61, 62, 64, 66-76]</sup> In some articles<sup>[62, 66, 68, 74, 75]</sup>, this was mentioned as collaborative behaviour, which was considered to be a facilitator of teamwork. Moreover, showing mutual respect and trust<sup>[53, 54, 56, 66, 71, 72, 74-76]</sup> between caregivers were important facilitators towards collaboration: it improves acting as a team, and it supports a safe team climate. An environment of greater psychological safety improved collaborative behaviour, and in some cases, it replaced working in silos with working as a team.<sup>[47, 50, 55, 61, 73, 75]</sup>

Developing and enhancing a shared vision, shared values and shared goals were mentioned as facilitators towards interprofessional collaboration.<sup>[43, 45, 49, 54, 74, 76]</sup> This was achieved by a structural inclusion of every team member in the development of the teams' vision, values

1  
2  
3 and goals.<sup>[76]</sup> By simply writing down these principles, caregivers were more likely to  
4 participate in developing shared principles.<sup>[45, 49]</sup> Although the development process was not  
5 explained in detail, three articles mentioned that once developed, shared vision, goals and  
6 values were crucial to maintaining a beneficial collaboration.<sup>[54, 74, 76]</sup> To establish these  
7 shared principles, a patient-centred focus may be an important asset. By prioritising the  
8 patient's needs and preferences, caregivers can find common ground more easily.<sup>[51, 69-72, 76]</sup>  
9  
10

11 Leadership seems of utmost importance to act as a team. Strategies towards collaborative  
12 leadership and shared leadership were mentioned in the articles,<sup>[43, 48, 51, 53, 56, 64, 67, 71, 73]</sup> and  
13 leaders and decision makers should be aware of the potential effects of policy and structural  
14 changes on interprofessional teamwork. By using a clear role assignment, caregivers can  
15 prevent issues in their collaboration.<sup>[58, 71, 74, 76]</sup> However, in one case,<sup>[50]</sup> a rotational  
16 leadership was implemented and suggested, in which there was no permanent leader.  
17  
18

19 One paper emphasised that awareness of potential unintended negative effects of changes  
20 on the functioning of interprofessional teams should be taken into account by decision  
21 makers.<sup>[51]</sup>  
22

### 23 *Theme 3: Communication strategies and shared decision-making*

24  
25 Sixteen articles provided communication strategies and strategies to facilitate shared  
26 decision-making, to improve interprofessional collaboration in primary care.<sup>[43, 46-49, 51-54, 57, 58,</sup>  
27 <sup>63, 69, 71, 72, 76]</sup> These strategies can be further delineated into the following subthemes: (i)  
28 knowledge about each other,<sup>[49, 69, 71]</sup> (ii) formal and informal meetings,<sup>[43, 47, 51, 58, 63, 71, 72]</sup> (iii)  
29 the use of structured guidelines and protocols,<sup>[48, 49, 69, 72]</sup> (iv) conflict resolution<sup>[46, 51, 57, 71, 72,</sup>  
30 <sup>76]</sup> and (v) relational equality.<sup>[52-54, 76]</sup>  
31  
32

33 Knowing each other's professional roles and tasks seems a precondition for teamwork.  
34 However, knowing more about each other's family situation, interests and hobbies was also  
35 mentioned to be important to improve the communication and collaboration between  
36 caregivers.<sup>[49, 69, 71]</sup>  
37  
38

39 Both formal<sup>[47, 51, 63, 71, 72]</sup> and informal<sup>[43, 58, 72]</sup> team meetings, mainly happening between  
40 caregivers working in the same practice (under one roof),<sup>[58]</sup> were considered as an  
41 important communication strategy. Formal meetings were mostly used to share information  
42 about patients or clients, distribute tasks and identify and solve problems in the  
43 organisation. Planning and structuring a team meeting can increase the efficiency and  
44 productivity of these meetings.<sup>[47, 51, 63, 71, 72]</sup> Informal meetings were important to know  
45 more about each other and facilitated the trust relations between caregivers. Information  
46 that could not be shared in the formal meetings often appeared in the informal meetings.  
47 Even lunches with team members were used as a communication strategy.<sup>[43, 58, 72]</sup>  
48  
49

50 Structured guidelines, standardised tools and protocols were used to improve the  
51 communication and coordination between caregivers working in primary care. These  
52 protocols provided more effective communication and the provision of an evidence-based  
53 approach towards collaboration and care delivery. Besides using protocols, workshops were  
54 organised to improve communication.<sup>[48, 49, 69, 72]</sup>  
55  
56

57 Making decisions as a team was an indicator of good and effective communication. Shared  
58 decision-making was mentioned in nine studies,<sup>[46, 51-54, 57, 71, 72, 76]</sup> and our analysis identified  
59  
60



1  
2  
3 conflict resolution<sup>[46, 51, 57, 71, 72, 76]</sup> and relational equality<sup>[52-54, 76]</sup> as key factors to improve  
4 shared decision-making.  
5

#### 6 *Theme 4: Coordination in primary care*

7  
8 By collaborating with different disciplines and professions, many caregivers were  
9 experiencing problems regarding information sharing<sup>[44, 45, 52, 53, 61, 62, 68, 70, 71, 74]</sup> and  
10 referring<sup>[43, 44, 46, 47, 52, 53, 57, 66, 71, 74]</sup> between primary health care workers. Twenty articles,  
11 therefore, provided strategies to improve coordination in order to ameliorate information  
12 sharing between caregivers, to facilitate referrals for the patient and to guarantee the  
13 continuity of care.<sup>[43-47, 52, 53, 55-57, 59-64, 66, 70, 71, 74]</sup> Accordingly, reciprocity and reciprocal  
14 interdependence were shown to play a crucial role in the coordination of primary care.<sup>[66, 74]</sup>  
15

16  
17 Co-location and the importance of architecture and building characteristics were, in some  
18 cases, mentioned as influential factors for collaboration.<sup>[56, 59, 63]</sup> By optimising the  
19 architecture and working under one roof, brief face-to-face interactions may increase. The  
20 architecture could be optimised by having shared spaces, thus leading to increased staff  
21 proximity or visibility. Especially informal communication was positively affected by the  
22 presence of convenient circulatory (e.g. foyers and lobbies) and transitional (e.g. courtyards,  
23 verandas, and corridors) spaces.<sup>[56, 59, 63]</sup> Additionally, weekly or monthly face-to-face  
24 meetings were organised to coordinate care. Face-to-face meetings and electronic task  
25 queues facilitate information sharing and efficient care coordination for complex patients.<sup>[59,  
26 63]</sup>  
27  
28  
29

#### 30 *Theme 5: Integration of caregivers and their skills and competences*

31  
32 Fifteen papers provided strategies to improve the integration of caregivers and their skills  
33 and competences in primary care practices<sup>[47-51, 54, 56, 60, 65, 67-72, 74]</sup> and tried to get the most  
34 out of every team member's presence.  
35

36  
37 For new team members, a successful integration was facilitated by welcoming the  
38 newcomers and making them know and understand the vision of the practice. Inclusion of  
39 the caregiver required additional proactive efforts regarding communication and  
40 coordination among practice members.<sup>[49, 74]</sup> In some cases, a personal, one-to-one meeting  
41 with the new team member could facilitate problem-solving.<sup>[49]</sup>  
42

43  
44 Eleven papers presented an improved integration of caregivers skills and competences, as a  
45 facilitator for task distribution and role clarification.<sup>[47, 48, 50, 51, 54, 56, 67, 70-72, 74]</sup> Knowing each  
46 other's capabilities, including skills and competences, was very important in this regard.<sup>[48, 50,  
47 56, 74]</sup> Additionally, making sure that caregivers not only know each other's skills and  
48 competences but also enable more transparency about their daily needs and preferences  
49 were mentioned as facilitators.<sup>[50, 56, 67, 71, 74]</sup> Six articles presented strategies to optimise the  
50 use of team members' skills and competences. By acknowledging and affirming their  
51 capabilities, integration of skills and competences was facilitated.<sup>[54, 60, 65, 69, 71, 74]</sup>  
52

53  
54 In one article, researchers indicated that the organisation of team communication-training  
55 workshops and implementation of flexible protocols gave practice stakeholders significant  
56 discretion to integrate new care team roles to best fit local needs. Furthermore, it improved  
57 team communication and functioning because of increased engagement and local leadership  
58 facilitation.<sup>[49]</sup>  
59  
60

## Discussion

This scoping review identified five themes for interventions and strategies aimed at improving and facilitating IPCI in primary care. The first category, which incorporates acceptance, and team readiness, was a precondition for enhancing and maintaining efficient interprofessional collaboration. Accepting to collaborate requires a change of attitude, which involves valuing team members and actively soliciting the opinions or receiving feedback from other team members.<sup>[78]</sup> An major barrier to adopting a suitable attitude towards collaboration is the difficulty and complexity of sharing responsibility for patient care within a team.<sup>[79, 80]</sup> Making caregivers aware of their shortcomings and the need for collaboration with different disciplines are effective ways to facilitate interprofessional collaboration.<sup>[46, 48, 52, 60, 71, 76]</sup> In addition, Liedvogel et al.<sup>[81]</sup> demonstrates that experiencing teamwork itself increases the awareness of the advantages, and the importance of collaboration, as well as gives caregivers opportunities to demonstrate their skills and capabilities. In the broader community, increased awareness of the importance of interprofessional collaboration can lead to an improved experience and understanding of the totality of healthcare services.<sup>[82]</sup> Furthermore, according to Lockwood and Maguire et al.,<sup>[83]</sup> it can also help to reduce the sense of isolation experienced by solo medical practitioners.

Second, collaborative behaviour has been described as a facilitator of teamwork.<sup>[62, 66, 68, 74, 75]</sup> To enhance and maintain a collaborative behaviour, the development of shared principles (such as shared vision, values and goals) is an important prerequisite.<sup>[43, 45, 49, 54, 74, 76]</sup> Our review revealed that maintaining a safe team climate in which care professionals feel comfortable is important to act as a team and not as an individual.<sup>[47, 50, 55, 61, 73, 75]</sup> Although psychological safety is not often mentioned in primary care research,<sup>[22]</sup> Edmondson et al.<sup>[11]</sup> and Kim et al.<sup>[84]</sup> have indicated the essential role of a safe workplace environment in enhancing teamwork. Team psychological safety is defined as a shared value; the team is safe for interpersonal risk taking.<sup>[85]</sup> This means that team members feel they will not be punished or humiliated for speaking up with ideas, questions, concerns or mistakes. A team may not be able to collaborate properly if there is a lack of psychological safety; hence, it is assumed that psychological safety is a necessary but insufficient condition for increasing interprofessional collaboration and workplace effectiveness.<sup>[86]</sup>

Third, structured guidelines and protocols seem to be beneficial for communication between care professionals, thereby impacting IPCI. Team meetings, especially formal meetings can be held more efficiently by using protocols, that have positive effects on hierarchy and conflicts resolution between team members.<sup>[87]</sup> Although interventions in our review did not give attention to informal meetings as much as existing literature<sup>[88-90]</sup>, Burm et al.<sup>[88]</sup> indicated that, by recognising the importance of informal meetings, care providers are more motivated to organise or participate in informal meetings. These meetings tended to be ad-hoc and improvised, and in some cases discussion topics were recorded in notebooks.<sup>[89, 90]</sup> The shared decision-making model has been put forward as a guide for discussing and making decisions in the most effective way.<sup>[91]</sup> This model includes three principles: recognizing and acknowledging that a decision is required, knowing and understanding the best available evidence, and incorporating the patient's values and preferences into the decision.<sup>[92]</sup>

1  
2  
3 Fourth, as an element of interprofessional collaboration and integration, care coordination is  
4 of utmost importance for patient safety. The situation-background-assessment-  
5 recommendation protocol is an existing method to perform information sharing efficiently  
6 and appropriately.<sup>[93]</sup> In addition, Lo et al.<sup>[94]</sup> suggest that the protocol may be a cost-  
7 effective method for coordinating between general practitioners and nurses.<sup>[94]</sup> To solve  
8 problems regarding care coordination, especially after the Covid19 pandemic, the use of  
9 digital healthcare tools was established.<sup>[95]</sup> Fagherazzi et al.<sup>[96]</sup> indicated that these digital  
10 tools improved triage and risk assessment.  
11  
12

13 Finally, optimal integration of caregivers skills and competences has been associated with  
14 maximalising every team member's presence and shortening the adaptation process of new  
15 team members.<sup>[97]</sup> Family caregivers provide a significant portion of health and support  
16 services to individuals with serious illnesses; however, existing literature and health care  
17 systems have often overlooked them and mostly focused on integrating care  
18 professionals.<sup>[98, 99]</sup> Friedman et al.<sup>[98]</sup> suggest using a framework, in which the family  
19 caregiver is an indispensable partner of care professionals and patients.  
20  
21  
22

23 Although all interventions or strategies are useful to a certain point, none is suitable to be  
24 used in isolation as a unique solution for IPCI in primary care. However, a mix of the  
25 interventions and strategies compiled in this scoping review may be capable of doing so. The  
26 consistency, design, and order of this mix of interventions and strategies cannot be specified  
27 based on the results of this scoping review.  
28  
29

30 This scoping review has several limitations. The review focuses exclusively on primary care;  
31 thus, our findings are not directly transferable to other healthcare levels. Only studies  
32 performed in high-income countries were included in this review; hence, our findings are not  
33 directly transferable to other countries because differences in health systems, financing,  
34 governance, title protection and culture can pose significant implementation challenges. In  
35 addition, by including only English-language articles and avoiding the grey literature, we  
36 might have missed some relevant papers. It is worthwhile to note, that this scoping review  
37 aimed to identify interventions that can improve interprofessional collaboration and  
38 integration in primary care and to list their impact on outcomes related to collaboration and  
39 integration. Our review did not report the effectiveness of interventions regarding health  
40 outcomes. Contrary to generic interventions focusing on IPCI, interventions focusing on a  
41 single disease and improving health outcomes were implemented more successfully and  
42 were evaluated in a more sophisticated way, using validated scales.<sup>[27, 100-102]</sup>  
43  
44  
45

46 We selected articles based on WHO's<sup>[7]</sup> and Orchard et al.'s<sup>[8]</sup> definition of interprofessional  
47 collaboration. For integrated care, we adopted the definitions of Lewis et al.'s<sup>[10]</sup> and  
48 Valentijn et al.'s<sup>[25]</sup> definitions, which represent a widely accepted consensus. However,  
49 there are many other definitions of IPCI care that, if adopted, could affect the inclusion or  
50 exclusion of articles.  
51  
52

53 The literature has established that researchers can influence the interpretation of data. This  
54 risk of bias was minimised by triangulating researchers from different backgrounds (e.g.  
55 nurses, pharmacists and a psychologist) through the whole process and conducting the  
56 selection of articles with a team of at least two researchers. This triangulation, intensive  
57 cooperation and inductive process increased the credibility and reduced the risk of bias to  
58 the interpretation of the data based on preconceived understanding and personal opinions.  
59  
60

1  
2  
3 A strength of this review is the fact that we did not limit the search to the collaboration  
4 between specific types of caregivers, or in relation to a specific disease, or condition of  
5 patients. Therefore, our data and analysis can be used in the context of or added to a broad  
6 scope of IPCI in primary care. Furthermore, we performed an inductive analysis within a  
7 multidisciplinary team of researchers, to expand the analysis and to identify generic  
8 strategies and interventions.  
9

## 10 11 Conclusion

12  
13 This scoping review identified five categories of strategies and interventions to improve or  
14 facilitate IPCI in primary care: (i) acceptance and team readiness towards collaboration, (ii)  
15 acting as a team and not as an individual, (iii) communication strategies and shared decision  
16 making, (iv) coordination in primary care and (v) integration of caregivers and their skills and  
17 competences. We did not identify a single strategy or intervention which is broad or generic  
18 enough to be used in every type of primary care setting.  
19

20  
21 We can conclude that a mix of the identified strategies and interventions, which we  
22 illustrated as 'building blocks', can provide valuable input to develop a generic intervention  
23 to be used in different settings and levels of primary health care.  
24

25  
26 **Figure legends:** Figure 1: PRISMA flow diagram. PRISMA, Preferred Reporting Items for Scoping  
27 reviews (\*IPCI= Interprofessional collaboration or integration)  
28

29  
30 **Funding statement:** This research was funded by fund Daniël De Coninck, King Baudouin Foundation,  
31 Belgium. The funder had no involvement in this study. Grant number: 2019-J5170820-211588  
32

33  
34 **Contributors:** All listed authors meet authorship criteria and no others meeting the criteria have  
35 been omitted. The following role distribution was given to perform the scoping review: (i)  
36 development of the research question and establishment of the search strategy: MMS, HDL, KdV,  
37 KVdB, and PVB, (ii) database search: MMS and PVB, (iii) record screening: MMS, PVB, HDL, KdV, and  
38 KVdB performed abstract and full text screenings, (iv) data analysis: MMS, HDL, KdV, KVdB, and PVB,  
39 (v) discussion construction: MMS, HDL, KdV, KVdB, PP, RR, and PVB, (vi) writing – review & editing:  
40 MMS, HDL, KdV, KVdB, PP, RR, and PVB.  
41

42  
43 **Competing interests:** None declared.

44  
45 **Patient consent for publication:** Not applicable.

46  
47 **Ethics approval:** This study did not involve human participants and did not require ethics approval.

48  
49 **Data availability statement:** All relevant data is available in the article and supplementary materials.  
50 No other data are available.

51  
52 **Supplementary material:** A detailed description of the search process is provided in the  
53 supplementary material.

## 54 Acknowledgements:

55  
56 We are grateful for the partnership with the Primary Care Academy ([www.academie-eerstelijns.be](http://www.academie-eerstelijns.be))  
57 and want to thank the King Baudouin Foundation and Fund Daniel De Coninck for the opportunity  
58 they offer us for conducting research and have impact on the primary care of Flanders, Belgium. The  
59 consortium of the Primary Care Academy consists Lead author: Roy Remmen–  
60

1  
2  
3 [roy.remmen@uantwerpen.be](mailto:roy.remmen@uantwerpen.be)—Department of Primary Care and Interdisciplinary Care, Faculty of  
4 Medicine and Health Sciences. University of Antwerp. Antwerp. Belgium; Emily Verté—Department  
5 of Primary Care and Interdisciplinary Care, Faculty of Medicine and Health Sciences. University of  
6 Antwerp. Antwerp. Belgium, Department of Family Medicine and Chronic Care, Faculty of Medicine  
7 and Pharmacy. Vrije Universiteit Brussel. Brussel. Belgium; Muhammed Mustafa Sirimsi—Centre for  
8 research and innovation in care, Faculty of Medicine and Health Sciences. University of Antwerp.  
9 Antwerp. Belgium; Peter Van Bogaert—Workforce Management and Outcomes Research in Care,  
10 Faculty of Medicine and Health Sciences. University of Antwerp. Belgium; Hans De Loof—Laboratory  
11 of Physio pharmacology, Faculty of Pharmaceutical Biomedical and Veterinary Sciences. University of  
12 Antwerp. Belgium; Kris Van den Broeck—Department of Primary Care and Interdisciplinary Care,  
13 Faculty of Medicine and Health Sciences. University of Antwerp. Antwerp. Belgium.; Sibyl  
14 Anthierens—Department of Primary Care and Interdisciplinary Care, Faculty of Medicine and Health  
15 Sciences. University of Antwerp. Antwerp. Belgium; Ine Huybrechts—Department of Primary Care  
16 and Interdisciplinary Care, Faculty of Medicine and Health Sciences. University of Antwerp. Antwerp.  
17 Belgium.; Peter Raeymaeckers—Department of Sociology, Faculty of Social Sciences, Faculty of Social  
18 Sciences. University of Antwerp. Belgium; Veerle Buffel- Department of Sociology; centre for  
19 population, family and health, Faculty of Social Sciences. University of Antwerp. Belgium.; Dirk  
20 Devroey- Department of Family Medicine and Chronic Care, Faculty of Medicine and Pharmacy. Vrije  
21 Universiteit Brussel. Brussel.; Bert Aertgeerts—Academic Centre for General Practice, Faculty of  
22 Medicine. KU Leuven. Leuven, Department of Public Health and Primary Care, Faculty of Medicine,  
23 KU Leuven. Leuven; Birgitte Schoenmakers—Department of Public Health and Primary Care, Faculty  
24 of Medicine, KU Leuven. Leuven. Belgium; Lotte Timmermans—Department of Public Health and  
25 Primary Care, Faculty of Medicine, KU Leuven. Leuven. Belgium.; Veerle Foulon—Department of  
26 Pharmaceutical and Pharmacological Sciences, Faculty Pharmaceutical Sciences. KU Leuven. Leuven.  
27 Belgium.; Anja Declerq—LUCAS-Centre for Care Research and Consultancy, Faculty of Social Sciences.  
28 KU Leuven. Leuven. Belgium.; Nick Verhaeghe—Research Group Social and Economic Policy and  
29 Social Inclusion, Research Institute for Work and Society. KU Leuven. Belgium.; Dominique Van de  
30 Velde Department of Rehabilitation Sciences, Occupational Therapy. Faculty of Medicine and Health  
31 Sciences. University of Ghent. Belgium., Department of Occupational Therapy. Artevelde University  
32 of Applied Sciences. Ghent. Belgium.; Pauline Boeckxstaens—Department of Public Health and  
33 Primary Care, Faculty of Medicine and Health sciences. University of Ghent. Belgium.; An De Sutter -  
34 Department of Public Health and Primary Care, Faculty of Medicine and Health sciences. University of  
35 Ghent. Belgium.; Patricia De Vriendt—Department of Rehabilitation Sciences, Occupational Therapy.  
36 Faculty of Medicine and Health Sciences. University of Ghent. Belgium., Frailty in Ageing (FRIA)  
37 Research Group, Department of Gerontology and Mental Health and Wellbeing (MENT) research  
38 group, Faculty of Medicine and Pharmacy. Vrije Universiteit. Brussels. Belgium., Department of  
39 Occupational Therapy. Artevelde University of Applied Sciences. Ghent. Belgium.; Lies Lahousse—  
40 Department of Bioanalysis, Faculty of Pharmaceutical Sciences, Ghent University. Ghent. Belgium.;  
41 Peter Pype—Department of Public Health and Primary Care, Faculty of Medicine and Health sciences.  
42 University of Ghent. Belgium., End-of-Life Care Research Group, Faculty of Medicine and Health  
43 Sciences. Vrije Universiteit Brussel and Ghent University. Ghent. Belgium.; Dagje Boeykens-  
44 Department of Rehabilitation Sciences, Occupational Therapy. Faculty of Medicine and Health  
45 Sciences. University of Ghent. Belgium., Department of Public Health and Primary Care, Faculty of  
46 Medicine and Health sciences. University of Ghent. Belgium.; Ann Van Hecke—Department of Public  
47 Health and Primary Care, Faculty of Medicine and Health sciences. University of Ghent. Belgium.,  
48 University Centre of Nursing and Midwifery, Faculty of Medicine and Health Sciences. University of  
49 Ghent. Belgium.; Peter Decat—Department of Public Health and Primary Care, Faculty of Medicine  
50 and Health sciences. University of Ghent. Belgium.; Rudi Roose—Department of Social Work and  
51  
52  
53  
54  
55  
56  
57  
58  
59  
60



1  
2  
3 Social Pedagogy, Faculty of Psychology and Educational Sciences. University Ghent. Belgium.; Sandra  
4 Martin—Expertise Centre Health Innovation. University College Leuven-Limburg. Leuven. Belgium.;  
5 Erica Rutten—Expertise Centre Health Innovation. University College Leuven-Limburg. Leuven.  
6 Belgium.; Sam Pless—Expertise Centre Health Innovation. University College Leuven-Limburg.  
7 Leuven. Belgium.; Vanessa Gauwe—Department of Occupational Therapy. Artevelde University of  
8 Applied Sciences. Ghent. Belgium.; Didier Reynaert- E-QUAL, University College of Applied Sciences  
9 Ghent. Ghent. Belgium.; Leen Van Landschoot—Department of Nursing, University of Applied  
10 Sciences Ghent. Ghent. Belgium.; Maja Lopez Hartmann—Department of Welfare and Health, Karel  
11 de Grote University of Applied Sciences and Arts. Antwerp. Belgium.; Tony Claeys- LiveLab, VIVES  
12 University of Applied Sciences. Kortrijk. Belgium.; Hilde Vandenhoudt—LiCalab, Thomas University of  
13 Applied Sciences. Turnhout. Belgium.; Kristel De Vlieghe—Department of Nursing—homecare, White-  
14 Yellow Cross. Brussels. Belgium.; Susanne Op de Beeck—Flemish Patient Platform. Heverlee. Belgium.  
15 Kristel driessens—Department of Sociology, Faculty of Social Sciences. University of Antwerp.  
16 Belgium  
17  
18  
19  
20

## 21 References

- 22 1. Holman, H.R., *The Relation of the Chronic Disease Epidemic to the Health Care Crisis*. ACR  
23 Open Rheumatology, 2020. **2**(3): p. 167-173.
- 24 2. Misra, V., et al., *Prioritizing coordination of primary health care*. Canadian family physician  
25 Medecin de famille canadien, 2020. **66**(6): p. 399-403.
- 26 3. Lubl6y, ., J.L. Kereszturi, and G. Benedek, *Lower fragmentation of coordination in primary*  
27 *care is associated with lower prescribing drug costs—lessons from chronic illness care in*  
28 *Hungary*. European Journal of Public Health, 2017. **27**(5): p. 826-829.
- 29 4. Timmins, L., et al., *Predicting Fragmented Care: Beneficiary, Primary Care Physician, and*  
30 *Practice Characteristics*. Health Services Research, 2021. **56**(S2): p. 60-61.
- 31 5. Brigham R. Frandsen, P., et al., *Care Fragmentation, Quality, and Costs Among Chronically Ill*  
32 *Patients*. The American Journal of Managed Care, 2015. **21**(5).
- 33 6. J. Van der Heyden, R.C., *Gezondheidsenquête 2018: Chronische ziekten en aandoeningen*.  
34 2018, Sciensano: Belgium.
- 35 7. World Health Organization, *Framework for action on interprofessional education and*  
36 *collaborative practice*. 2010, World Health Organization.
- 37 8. Orchard, C., *Persistent isolationist or collaborator? The nurse's role in interprofessional*  
38 *collaborative practice*. Journal of nursing management, 2010. **18**: p. 248-57.
- 39 9. Goodwin, N., et al., *Integrated care for patients and populations: improving outcomes by*  
40 *working together*. London: King's Fund, 2012.
- 41 10. Lewis, R.Q., et al., *Where next for integrated care organisations in the English NHS*. London:  
42 The Nuffield Trust, 2010.
- 43 11. Edmondson, A.C., *The fearless organization: Creating psychological safety in the workplace*  
44 *for learning, innovation, and growth*. 2018: John Wiley & Sons.
- 45 12. Boeykens, D., et al., *How do people living with chronic conditions and their informal*  
46 *caregivers experience primary care? A phenomenological-hermeneutical study*. J Clin Nurs,  
47 2022.
- 48 13. World Health, O., *WHO global strategy on people-centred and integrated health services:*  
49 *interim report*. 2015, World Health Organization: Geneva.
- 50 14. Bookey-Bassett, S., et al., *A review of instruments to measure interprofessional collaboration*  
51 *for chronic disease management for community-living older adults*. Journal of  
52 Interprofessional Care, 2016. **30**: p. 201 - 210.
- 53 15. Orchard, C., et al., *Assessment of Interprofessional Team Collaboration Scale (AITCS): Further*  
54 *Testing and Instrument Revision*. J Contin Educ Health Prof, 2018. **38**(1): p. 11-18.
- 55  
56  
57  
58  
59  
60

16. Bardet, J.D., et al., *Physicians and community pharmacists collaboration in primary care: A review of specific models*. Res Social Adm Pharm, 2015. **11**(5): p. 602-22.
17. Chaudhri, K., et al., *General practitioner and pharmacist collaboration: does this improve risk factors for cardiovascular disease and diabetes? A systematic review protocol*. BMJ Open, 2019. **9**(8): p. e027634.
18. Graham, F., et al., *Barriers and facilitators to implementation of shared medical appointments in primary care for the management of long-term conditions: a systematic review and synthesis of qualitative studies*. BMJ Open, 2021. **11**(8): p. e046842.
19. Rathbone, A.P., et al., *Qualitative study to conceptualise a model of interprofessional collaboration between pharmacists and general practitioners to support patients' adherence to medication*. BMJ Open, 2016. **6**(3): p. e010488.
20. Reeves, S., et al., *Interprofessional online learning for primary healthcare: findings from a scoping review*. BMJ Open, 2017. **7**(8): p. e016872.
21. Schmutz, J.B., L.L. Meier, and T. Manser, *How effective is teamwork really? The relationship between teamwork and performance in healthcare teams: a systematic review and meta-analysis*. BMJ Open, 2019. **9**(9): p. e028280.
22. Sholl, S., et al., *Understanding the healthcare workplace learning culture through safety and dignity narratives: a UK qualitative study of multiple stakeholders' perspectives*. BMJ Open, 2019. **9**(5): p. e025615.
23. Van Dongen, J.J.J., et al., *Interprofessional collaboration regarding patients' care plans in primary care: a focus group study into influential factors*. BMC family practice, 2016. **17**(1): p. 1-10.
24. Goodwin, N., *Understanding integrated care: a complex process, a fundamental principle*. International journal of integrated care, 2013. **13**: p. e011-e011.
25. Valentijn, P.P., et al., *Towards a taxonomy for integrated care: a mixed-methods study*. International journal of integrated care, 2015. **15**: p. e003-e003.
26. Kaur, L. and E. Tadros, *The Benefits of Interprofessional Collaboration for a Pharmacist and Family Therapist*. The American Journal of Family Therapy, 2018. **46**(5): p. 470-485.
27. Reeves, S., et al., *Interprofessional collaboration to improve professional practice and healthcare outcomes*. Cochrane Database of Systematic Reviews, 2017(6).
28. Roller-Wirnsberger, R., et al., *European collaborative and interprofessional capability framework for prevention and management of frailty—A consensus process supported by the Joint Action for Frailty Prevention (ADVANTAGE) and the European Geriatric Medicine Society (EuGMS)*. Aging clinical and experimental research, 2020. **32**(4): p. 561-570.
29. Bachynsky, N. *Implications for policy: The triple aim, quadruple aim, and interprofessional collaboration*. in *Nursing Forum*. 2020. Wiley Online Library.
30. Zwarenstein, M., J. Goldman, and S. Reeves, *Interprofessional collaboration: effects of practice-based interventions on professional practice and healthcare outcomes*. Cochrane database of systematic reviews, 2009(3).
31. Reeves, S., et al., *A scoping review to improve conceptual clarity of interprofessional interventions*. Journal of interprofessional care, 2011. **25**(3): p. 167-174.
32. Johansen, J.S., et al., *Interdisciplinary collaboration across secondary and primary care to improve medication safety in the elderly (IMMENSE study): study protocol for a randomised controlled trial*. BMJ Open, 2018. **8**(1): p. e020106.
33. Hoare, E., et al., *Systematic review of mental health and well-being outcomes following community-based obesity prevention interventions among adolescents*. BMJ Open, 2015. **5**(1): p. e006586.
34. House, S. and D. Havens, *Nurses' and Physicians' Perceptions of Nurse-Physician Collaboration: A Systematic Review*. J Nurs Adm, 2017. **47**(3): p. 165-171.
35. Körner, M., et al., *Interprofessional teamwork and team interventions in chronic care: A systematic review*. J Interprof Care, 2016. **30**(1): p. 15-28.



- 1  
2  
3 36. Campbell, A.R., et al., *Interventions to promote teamwork, delegation and communication among registered nurses and nursing assistants: An integrative review*. J Nurs Manag, 2020. **28**(7): p. 1465-1472.
- 4  
5  
6 37. Buljac-Samardzic, M., K.D. Doekhie, and J.D.H. van Wijngaarden, *Interventions to improve team effectiveness within health care: a systematic review of the past decade*. Hum Resour Health, 2020. **18**(1): p. 2.
- 7  
8  
9 38. Johansson, G., K. Eklund, and G. Gosman-Hedström, *Multidisciplinary team, working with elderly persons living in the community: a systematic literature review*. Scand J Occup Ther, 2010. **17**(2): p. 101-16.
- 10  
11  
12 39. Arksey, H. and L. O'Malley, *Scoping studies: towards a methodological framework*. International Journal of Social Research Methodology, 2005. **8**(1): p. 19-32.
- 13  
14  
15 40. Tricco, A.C., et al., *PRISMA Extension for Scoping Reviews (PRISMA-ScR): Checklist and Explanation*. Ann Intern Med, 2018. **169**(7): p. 467-473.
- 16  
17  
18 41. WorldBank. *World Bank Country and Lending Groups*. 2021 [05-08-2021]; Available from: <https://datahelpdesk.worldbank.org/knowledgebase/articles/906519-world-bank-country-and-lending-groups>.
- 19  
20  
21 42. Ouzzani, M., et al., *Rayyan—a web and mobile app for systematic reviews*. Systematic Reviews, 2016. **5**(1): p. 210.
- 22  
23  
24 43. Bentley, M., et al., *Interprofessional teamwork in comprehensive primary healthcare services: Findings from a mixed methods study*. Journal of interprofessional care, 2018. **32**(3): p. 274-283.
- 25  
26  
27 44. Berkowitz, S.A., et al., *Case Study: Johns Hopkins Community Health Partnership: A model for transformation*. Healthcare (Amsterdam, Netherlands), 2016. **4**(4): p. 264-270.
- 28  
29  
30 45. Chan, B.C., et al., *Finding common ground? Evaluating an intervention to improve teamwork among primary health-care professionals*. International journal for quality in health care : journal of the International Society for Quality in Health Care, 2010. **22**(6): p. 519-524.
- 31  
32  
33 46. Coleman, M.T., et al., *Interprofessional ambulatory primary care practice-based educational program*. Journal of interprofessional care, 2008. **22**(1): p. 69-84.
- 34  
35  
36 47. Curran, V., J. Sargeant, and A. Hollett, *Evaluation of an interprofessional continuing professional development initiative in primary health care*. Journal of Continuing Education in the Health Professions, 2007. **27**(4): p. 241-252.
- 37  
38  
39 48. Goldman, J., et al., *Interprofessional primary care protocols: a strategy to promote an evidence-based approach to teamwork and the delivery of care*. J Interprof Care, 2010. **24**(6): p. 653-65.
- 40  
41  
42 49. Grace, S.M., et al., *Flexible implementation and integration of new team members to support patient-centered care*. Healthc (Amst), 2014. **2**(2): p. 145-51.
- 43  
44  
45 50. Hilts, L., et al., *Helping primary care teams emerge through a quality improvement program*. Family Practice, 2013. **30**(2): p. 204-211.
- 46  
47  
48 51. Josi, R., M. Bianchi, and S.K. Brandt, *Advanced practice nurses in primary care in Switzerland: an analysis of interprofessional collaboration*. BMC nursing, 2020. **19**: p. 1.
- 49  
50  
51 52. Kim, L.Y., et al., *What makes team communication effective: a qualitative analysis of interprofessional primary care team members' perspectives*. J Interprof Care, 2019. **33**(6): p. 836-838.
- 52  
53  
54 53. Kotecha, J., et al., *Influence of a quality improvement learning collaborative program on team functioning in primary healthcare*. Families, systems & health : the journal of collaborative family healthcare, 2015. **33**(3): p. 222-230.
- 55  
56  
57 54. Legare, F., et al., *Validating a conceptual model for an inter-professional approach to shared decision making: a mixed methods study*. J Eval Clin Pract, 2011. **17**(4): p. 554-64.
- 58  
59  
60 55. Lockhart, E., et al., *Engaging primary care physicians in care coordination for patients with complex medical conditions*. Canadian Family Physician, 2019. **65**(4): p. E155-E162.

- 1
  - 2
  - 3
  - 4
  - 5
  - 6
  - 7
  - 8
  - 9
  - 10
  - 11
  - 12
  - 13
  - 14
  - 15
  - 16
  - 17
  - 18
  - 19
  - 20
  - 21
  - 22
  - 23
  - 24
  - 25
  - 26
  - 27
  - 28
  - 29
  - 30
  - 31
  - 32
  - 33
  - 34
  - 35
  - 36
  - 37
  - 38
  - 39
  - 40
  - 41
  - 42
  - 43
  - 44
  - 45
  - 46
  - 47
  - 48
  - 49
  - 50
  - 51
  - 52
  - 53
  - 54
  - 55
  - 56
  - 57
  - 58
  - 59
  - 60
56. MacNaughton, K., S. Chreim, and I.L. Bourgeault, *Role construction and boundaries in interprofessional primary health care teams: a qualitative study*. BMC health services research, 2013. **13**: p. 486.
57. Mahmood-Yousuf, K., et al., *Interprofessional relationships and communication in primary palliative care: impact of the Gold Standards Framework*. The British journal of general practice : the journal of the Royal College of General Practitioners, 2008. **58**(549): p. 256-263.
58. Morgan, S., S. Pullon, and E. McKinlay, *Observation of interprofessional collaborative practice in primary care teams: An integrative literature review*. International journal of nursing studies, 2015. **52**(7): p. 1217-1230.
59. Morgan, S., et al., *Collaborative Care in Primary Care: The Influence of Practice Interior Architecture on Informal Face-to-Face Communication—An Observational Study*. HERD: Health Environments Research & Design Journal, 2020. **14**(1): p. 190-209.
60. Murphy, B., et al., *Change in mental health collaborative care attitudes and practice in Australia Impact of participation in MHPN network meetings*. Journal of Integrated Care, 2018. **26**(1): p. 29-37.
61. Pullon, S., et al., *Observation of interprofessional collaboration in primary care practice: A multiple case study*. Journal of interprofessional care, 2016. **30**(6): p. 787-794.
62. Reay, T., et al., *Legitimizing new practices in primary health care*. Health Care Manage Rev, 2013. **38**(1): p. 9-19.
63. Reeves, S., et al., *Interprofessional collaboration to improve professional practice and healthcare outcomes*. Cochrane Database Syst Rev, 2017. **6**(6): p. Cd000072.
64. Robben, S., et al., *Impact of interprofessional education on collaboration attitudes, skills, and behavior among primary care professionals*. The Journal of continuing education in the health professions, 2012. **32**(3): p. 196-204.
65. Rodriguez, C. and M. Pozzebon, *The implementation evaluation of primary care groups of practice: a focus on organizational identity*. BMC Fam Pract, 2010. **11**: p. 15.
66. Rodriguez, H.P., et al., *Availability of primary care team members can improve teamwork and readiness for change*. Health care management review, 2016. **41**(4): p. 286-295.
67. Russell, G.M., et al., *Contextual levers for team-based primary care: lessons from reform interventions in five jurisdictions in three countries*. Family Practice, 2018. **35**(3): p. 276-284.
68. Sargeant, J., E. Loney, and G. Murphy, *Effective interprofessional teams: "contact is not enough" to build a team*. The Journal of continuing education in the health professions, 2008. **28**(4): p. 228-234.
69. Tierney, E., et al., *Interdisciplinary team working in the Irish primary healthcare system: Analysis of 'invisible' bottom up innovations using Normalisation Process Theory*. Health Policy, 2019. **123**(11): p. 1083-1092.
70. Valaitis, R., et al., *Examining Interprofessional teams structures and processes in the implementation of a primary care intervention (Health TAPESTRY) for older adults using normalization process theory*. BMC Family Practice, 2020. **21**(1): p. 14.
71. van Dongen, J.J.J., et al., *Suitability of a Programme for Improving Interprofessional Primary Care Team Meetings*. International journal of integrated care, 2018. **18**(4): p. 12-12.
72. van Dongen, J.J.J., et al., *Development of a Customizable Programme for Improving Interprofessional Team Meetings: An Action Research Approach*. Int J Integr Care, 2018. **18**(1): p. 8.
73. van Dongen, J.J., et al., *Interprofessional collaboration regarding patients' care plans in primary care: a focus group study into influential factors*. BMC Fam Pract, 2016. **17**: p. 58.
74. Wener, P. and R.L. Woodgate, *Collaborating in the context of co-location: a grounded theory study*. BMC family practice, 2016. **17**: p. 30.
75. Wilcock, P.M., C. Champion-Smith, and M. Head, *The Dorset Seedcorn Project: interprofessional learning and continuous quality improvement in primary care*. British Journal of General Practice, 2002. **52**: p. S39-S44.

- 1  
2  
3 76. Young, J., et al., *Shared care requires a shared vision: communities of clinical practice in a primary care setting*. Journal of Clinical Nursing, 2017. **26**(17): p. 2689-2702.
- 4  
5 77. Ruth Mingli, Z., S. Yu Fan, and K. Gerald Choon-Huat, *Attitudes towards interprofessional collaboration among primary care physicians and nurses in Singapore*. Journal of  
6  
7  
8  
9 78. Lavelle, M., et al., *An evidence based framework for the Temporal Observational Analysis of Teamwork in healthcare settings*. Appl Ergon, 2020. **82**: p. 102915.
- 10  
11 79. Anderson, J., M. Lavelle, and G. Reedy, *Understanding adaptive teamwork in health care: Progress and future directions*. Journal of Health Services Research & Policy, 2020. **26**: p. 135581962097843.
- 12  
13  
14 80. Braithwaite, J., et al., *The basis of clinical tribalism, hierarchy and stereotyping: a laboratory-controlled teamwork experiment*. BMJ Open, 2016. **6**(7): p. e012467.
- 15  
16 81. McInnes, S., et al., *An integrative review of facilitators and barriers influencing collaboration and teamwork between general practitioners and nurses working in general practice*. Journal  
17  
18  
19  
20 82. Liedvogel, M., E. Haesler, and K. Anderson, *Who will be running your practice in 10 years?: Supporting GP registrars' awareness and knowledge of practice ownership*. Australian family  
21  
22  
23  
24 83. Lockwood, A. and F. Maguire, *General Practitioners and Nurses Collaborating in General Practice*. Australian Journal of Primary Health, 2000. **6**: p. 19-29.
- 25  
26 84. Kim, S., H. Lee, and T.P. Connerton, *How psychological safety affects team performance: mediating role of efficacy and learning behavior*. Frontiers in psychology, 2020. **11**: p. 1581.
- 27  
28 85. Edmondson, A., *Psychological safety and learning behavior in work teams*. Administrative science quarterly, 1999. **44**(2): p. 350-383.
- 29  
30 86. Frazier, M.L., et al., *Psychological Safety: A Meta-Analytic Review and Extension*. Personnel Psychology, 2017. **70**(1): p. 113-165.
- 31  
32 87. Vardaman, J.M., et al., *Beyond communication: the role of standardized protocols in a changing health care environment*. Health Care Manage Rev, 2012. **37**(1): p. 88-97.
- 33  
34 88. Burm, S., et al., *Recognising the importance of informal communication events in improving collaborative care*. BMJ Quality & Safety, 2019. **28**(4): p. 289-295.
- 35  
36 89. Fox, S., et al., *Communication and Interprofessional Collaboration in Primary Care: From Ideal to Reality in Practice*. Health Communication, 2021. **36**(2): p. 125-135.
- 37  
38 90. Persson, S.S., K. Blomqvist, and P.N. Lindström, *Meetings are an Important Prerequisite for Flourishing Workplace Relationships*. International Journal of Environmental Research and  
39  
40  
41  
42 91. Bomhof-Roordink, H., et al., *Shared decision making in oncology: A model based on patients', health care professionals', and researchers' views*. Psycho-Oncology, 2019. **28**(1): p. 139-146.
- 43  
44 92. Elwyn, G., et al., *Shared decision making: a model for clinical practice*. Journal of general internal medicine, 2012. **27**(10): p. 1361-1367.
- 45  
46 93. Müller, M., et al., *Impact of the communication and patient hand-off tool SBAR on patient safety: a systematic review*. BMJ Open, 2018. **8**(8): p. e022202.
- 47  
48 94. Lo, L., L. Rotteau, and K. Shojania, *Can SBAR be implemented with high fidelity and does it improve communication between healthcare workers? A systematic review*. BMJ Open, 2021. **11**(12): p. e055247.
- 49  
50  
51  
52 95. Solomon, D.H. and R.S. Rudin, *Digital health technologies: opportunities and challenges in rheumatology*. Nature Reviews Rheumatology, 2020. **16**(9): p. 525-535.
- 53  
54 96. Fagherazzi, G., et al., *Digital health strategies to fight COVID-19 worldwide: challenges, recommendations, and a call for papers*. Journal of Medical Internet Research, 2020. **22**(6): p. e19284.
- 55  
56  
57 97. Rasin-Waters, D., et al., *The Integrated Care Team Approach of the Department of Veterans Affairs (VA): Geriatric Primary Care*. Archives of Clinical Neuropsychology, 2018. **33**(3): p. 280-289.
- 58  
59  
60

- 1  
2  
3 98. Friedman, E.M. and P.K. Tong, *A Framework for Integrating Family Caregivers into the Health*  
4 *Care Team*. 2020, Santa Monica, CA: RAND Corporation.  
5 99. Ugalde, A., et al., *Effective integration of caregivers and families as part of the care team for*  
6 *people with cancer*. Australian Journal for General Practitioners, 2021. **50**: p. 527-531.  
7 100. Zierler, B.K., et al., *An interprofessional collaborative practice approach to transform heart*  
8 *failure care: An overview*. Journal of Interprofessional Care, 2018. **32**(3): p. 378-381.  
9 101. Nagelkerk, J., et al., *Improving outcomes in adults with diabetes through an interprofessional*  
10 *collaborative practice program*. Journal of Interprofessional Care, 2018. **32**(1): p. 4-13.  
11 102. Pascucci, D., et al., *Impact of interprofessional collaboration on chronic disease management:*  
12 *findings from a systematic review of clinical trial and meta-analysis*. Health Policy, 2021.  
13 **125**(2): p. 191-202.  
14  
15  
16  
17  
18  
19  
20  
21  
22  
23  
24  
25  
26  
27  
28  
29  
30  
31  
32  
33  
34  
35  
36  
37  
38  
39  
40  
41  
42  
43  
44  
45  
46  
47  
48  
49  
50  
51  
52  
53  
54  
55  
56  
57  
58  
59  
60

For peer review only

Records identified through database search in Pubmed, Medline, Eric, and Web of Science (n = 1,816)

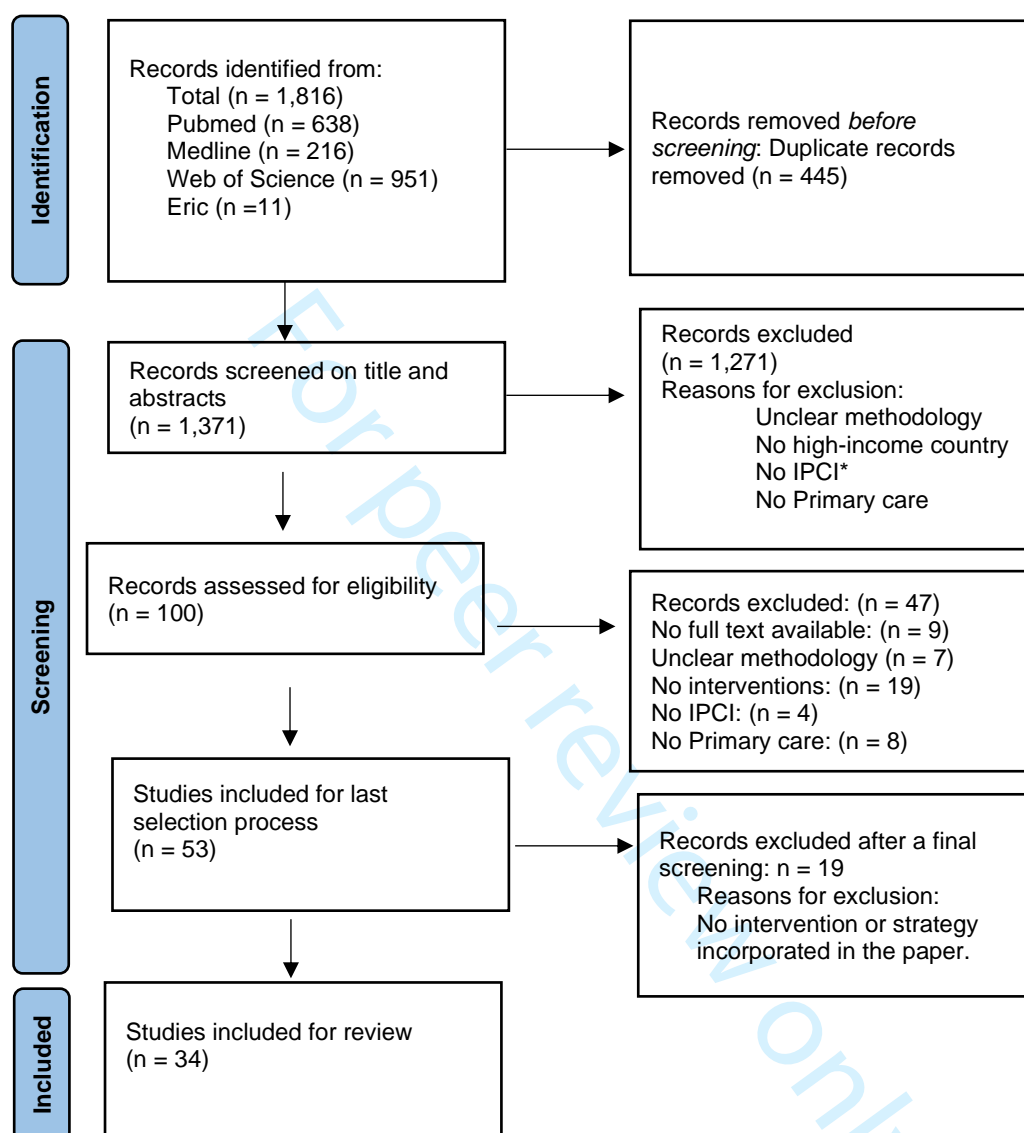

Figure 1: PRISMA flow diagram. PRISMA, Preferred Reporting Items for Scoping reviews (\*IPCI= Interprofessional collaboration or integration)

## To identify relevant articles we used the following search strategies in PubMed, Web Of Science, and Eric

The search strategy we used in PubMed is included in the manuscript. For the remaining databases, we used the same search strategy, however, since their search engine is designed differently, we found it necessary to include the search strategies as a supplementary file. As mentioned in the article, no websites or grey literature were examined in this review. Additionally, we didn't use any limitations. The manuscripts were approved based on the eligibility criteria.

### 1. PubMed

| MeSH/search terms and combinations for PubMed                                                |
|----------------------------------------------------------------------------------------------|
| 1. primary care                                                                              |
| 2. primary healthcare                                                                        |
| 3. primary health care                                                                       |
| 1 or 2 or 3 (Title/abstract)                                                                 |
| 5. integrative team                                                                          |
| 6. integrative teams                                                                         |
| 7. collaborative practice                                                                    |
| 8. collaborative practices                                                                   |
| 9. interdisciplinary team                                                                    |
| 10. interdisciplinary teams                                                                  |
| 11. multidisciplinary team                                                                   |
| 12. multidisciplinary teams                                                                  |
| 13. interprofessional team                                                                   |
| 14. interprofessional teams                                                                  |
| 15. healthcare team                                                                          |
| 16. healthcare teams                                                                         |
| 17. health care team                                                                         |
| 18. health care teams                                                                        |
| 5 or 6 or 7 or 8 or 9 or 10 or 11 or 12 or 13 or 14 or 15 or 16 or 17 or 18 (title/abstract) |
| 20. interprofessional collaboration                                                          |
| 21. interprofessional teamwork                                                               |
| 22. interprofessional teamwork                                                               |
| 23. interdisciplinary collaboration                                                          |
| 24. interdisciplinary teamwork                                                               |
| 25. interdisciplinary teamwork                                                               |
| 26. multidisciplinary collaboration                                                          |
| 20 or 21 or 22 or 23 or 24 or 25 or 26 (All fields)                                          |
| 4 AND 19 AND 27                                                                              |

Table 1: keywords and MeSH terms used to identify relevant data.



## 2. Web Of Science

In the Web Of Science search engine, it was not possible to search for title/abstract simultaneously. Thus, we searched for them separately as illustrated below.

Queries:

(TI=(primary care OR primary health care OR primary health care)) AND AB=(primary care OR primary health care OR primary health care)

### AND

(TI=((integrative team OR integrative teams OR collaborative practice OR collaborative practices OR interdisciplinary team OR interdisciplinary teams OR multidisciplinary team OR multidisciplinary teams OR interprofessional team OR interprofessional teams OR health care team OR health care teams OR health care team OR health care teams))) AND AB=((integrative team OR integrative teams OR collaborative practice OR collaborative practices OR interdisciplinary team OR interdisciplinary teams OR multidisciplinary team OR multidisciplinary teams OR interprofessional team OR interprofessional teams OR health care team OR health care teams OR health care team OR health care teams)))

### AND

ALL=(interprofessional collaboration OR interprofessional teamwork OR interprofessional teamwork OR interdisciplinary collaboration OR interdisciplinary teamwork OR interdisciplinary teamwork OR multidisciplinary collaboration)

#### MeSH/search terms and combinations for PubMed

- |                             |
|-----------------------------|
| 1. primary care             |
| 2. primary health care      |
| 3. primary healthcare       |
| 4 = 1 or 2 or 3 (Title)     |
| 5. primary care             |
| 6. primary health care      |
| 7. primary healthcare       |
| 8 = 5 or 6 or 7 (Abstract)  |
| 9. integrative team         |
| 10. integrative teams       |
| 11. collaborative practice  |
| 12. collaborative practices |
| 13. interdisciplinary team  |
| 14. interdisciplinary teams |
| 15. multidisciplinary team  |
| 16. multidisciplinary teams |
| 17. interprofessional team  |
| 18. interprofessional teams |
| 19. health care team        |
| 20. health care teams       |
| 21. healthcare team         |



|                                                                                                  |
|--------------------------------------------------------------------------------------------------|
| 22. healthcare teams                                                                             |
| 23 = 9 or 10 or 11 or 12 or 13 or 14 or 15 or 16 or 17 or 18 or 19 or 20 or 21 or 22 (Title)     |
| 24. integrative team                                                                             |
| 25. integrative teams                                                                            |
| 26. collaborative practice                                                                       |
| 27. collaborative practices                                                                      |
| 28. interdisciplinary team                                                                       |
| 29. interdisciplinary teams                                                                      |
| 30. multidisciplinary team                                                                       |
| 31. multidisciplinary teams                                                                      |
| 32. interprofessional team                                                                       |
| 33. interprofessional teams                                                                      |
| 34. health care team                                                                             |
| 35. health care teams                                                                            |
| 36. healthcare team                                                                              |
| 37. healthcare teams                                                                             |
| 38 = 24 or 25 or 26 or 27 or 28 or 29 or 30 or 31 or 32 or 33 or 34 or 35 or 36 or 37 (Abstract) |
| 39. interprofessional collaboration                                                              |
| 40. interprofessional teamwork                                                                   |
| 41. interprofessional teamwork                                                                   |
| 42. interdisciplinary collaboration                                                              |
| 43. interdisciplinary teamwork                                                                   |
| 44. interdisciplinary teamwork                                                                   |
| 45. multidisciplinary collaboration                                                              |
| 46 = 39 or 40 or 41 or 42 or 43 or 44 or 45 (All fields)                                         |
| 47 = 4 AND 8 AND 23 AND 38 AND 46                                                                |

Table 2: keywords and MeSH terms used to identify relevant data in Web Of Science.

### 3. ERIC

(TI=(primary care OR primary health care OR primary health care)) AND AB=(primary care OR primary health care OR primary health care)

#### AND

(TI=((integrative team OR integrative teams OR collaborative practice OR collaborative practices OR interdisciplinary team OR interdisciplinary teams OR multidisciplinary team OR multidisciplinary teams OR interprofessional team OR interprofessional teams OR health care team OR health care teams OR health care team OR health care teams))) AND AB=(((integrative team OR integrative teams OR collaborative practice OR collaborative practices OR interdisciplinary team OR interdisciplinary teams OR multidisciplinary team OR multidisciplinary teams OR interprofessional team OR interprofessional teams OR health care team OR health care teams OR health care team OR health care teams)))

#### AND

TX=(interprofessional collaboration OR interprofessional teamwork OR interprofessional teamwork OR interdisciplinary collaboration OR interdisciplinary teamwork OR interdisciplinary teamwork OR multidisciplinary collaboration)

### MeSH/search terms and combinations for PubMed

|    |                                                                                                  |
|----|--------------------------------------------------------------------------------------------------|
| 1  |                                                                                                  |
| 2  |                                                                                                  |
| 3  |                                                                                                  |
| 4  |                                                                                                  |
| 5  |                                                                                                  |
| 6  | 1. primary care                                                                                  |
| 7  | 2. primary healthcare                                                                            |
| 8  | 3. primary health care                                                                           |
| 9  | 4 = 1 or 2 or 3 (Title)                                                                          |
| 10 |                                                                                                  |
| 11 | 5. primary care                                                                                  |
| 12 | 6. primary healthcare                                                                            |
| 13 | 7. primary health care                                                                           |
| 14 |                                                                                                  |
| 15 | 8 = 5 or 6 or 7 (Abstract)                                                                       |
| 16 | 9. integrative team                                                                              |
| 17 | 10. integrative teams                                                                            |
| 18 | 11. collaborative practice                                                                       |
| 19 | 12. collaborative practices                                                                      |
| 20 | 13. interdisciplinary team                                                                       |
| 21 | 14. interdisciplinary teams                                                                      |
| 22 | 15. multidisciplinary team                                                                       |
| 23 | 16. multidisciplinary teams                                                                      |
| 24 | 17. interprofessional team                                                                       |
| 25 | 18. interprofessional teams                                                                      |
| 26 | 19. healthcare team                                                                              |
| 27 | 20. healthcare teams                                                                             |
| 28 | 21. health care team                                                                             |
| 29 | 22. health care teams                                                                            |
| 30 |                                                                                                  |
| 31 | 23 = 9 or 10 or 11 or 12 or 13 or 14 or 15 or 16 or 17 or 18 or 19 or 20 or 21 or 22 (Title)     |
| 32 | 24. integrative team                                                                             |
| 33 | 25. integrative teams                                                                            |
| 34 | 26. collaborative practice                                                                       |
| 35 | 27. collaborative practices                                                                      |
| 36 | 28. interdisciplinary team                                                                       |
| 37 | 29. interdisciplinary teams                                                                      |
| 38 | 30. multidisciplinary team                                                                       |
| 39 | 31. multidisciplinary teams                                                                      |
| 40 | 32. interprofessional team                                                                       |
| 41 | 33. interprofessional teams                                                                      |
| 42 | 34. healthcare team                                                                              |
| 43 | 35. healthcare teams                                                                             |
| 44 | 36. health care team                                                                             |
| 45 | 37. health care teams                                                                            |
| 46 |                                                                                                  |
| 47 | 38 = 24 or 25 or 26 or 27 or 28 or 29 or 30 or 31 or 32 or 33 or 34 or 35 or 36 or 37 (Abstract) |
| 48 |                                                                                                  |
| 49 | 39. interprofessional collaboration                                                              |
| 50 | 40. interprofessional teamwork                                                                   |
| 51 | 41. interprofessional teamwork                                                                   |
| 52 | 42. interdisciplinary collaboration                                                              |
| 53 | 43. interdisciplinary teamwork                                                                   |
| 54 |                                                                                                  |
| 55 |                                                                                                  |
| 56 |                                                                                                  |
| 57 |                                                                                                  |
| 58 |                                                                                                  |
| 59 |                                                                                                  |
| 60 |                                                                                                  |

|                                                        |
|--------------------------------------------------------|
| 44. interdisciplinary teamwork                         |
| 45. multidisciplinary collaboration                    |
| 46 = 39 or 40 or 41 or 42 or 43 or 44 or 45 (All text) |
| 47 = 4 AND 8 AND 23 AND 38 AND 46                      |

Table 3: keywords and MeSH terms used to identify relevant data in ERIC.

For peer review only

## Preferred Reporting Items for Systematic reviews and Meta-Analyses extension for Scoping Reviews (PRISMA-ScR) Checklist

| SECTION                                               | ITEM | PRISMA-ScR CHECKLIST ITEM                                                                                                                                                                                                                                                                                  | REPORTED ON PAGE #   |
|-------------------------------------------------------|------|------------------------------------------------------------------------------------------------------------------------------------------------------------------------------------------------------------------------------------------------------------------------------------------------------------|----------------------|
| <b>TITLE</b>                                          |      |                                                                                                                                                                                                                                                                                                            |                      |
| Title                                                 | 1    | Identify the report as a scoping review.                                                                                                                                                                                                                                                                   | 1                    |
| <b>ABSTRACT</b>                                       |      |                                                                                                                                                                                                                                                                                                            |                      |
| Structured summary                                    | 2    | Provide a structured summary that includes (as applicable): background, objectives, eligibility criteria, sources of evidence, charting methods, results, and conclusions that relate to the review questions and objectives.                                                                              | 1,2                  |
| <b>INTRODUCTION</b>                                   |      |                                                                                                                                                                                                                                                                                                            |                      |
| Rationale                                             | 3    | Describe the rationale for the review in the context of what is already known. Explain why the review questions/objectives lend themselves to a scoping review approach.                                                                                                                                   | 2 and 3              |
| Objectives                                            | 4    | Provide an explicit statement of the questions and objectives being addressed with reference to their key elements (e.g., population or participants, concepts, and context) or other relevant key elements used to conceptualize the review questions and/or objectives.                                  | 2 and 3              |
| <b>METHODS</b>                                        |      |                                                                                                                                                                                                                                                                                                            |                      |
| Protocol and registration                             | 5    | Indicate whether a review protocol exists; state if and where it can be accessed (e.g., a Web address); and if available, provide registration information, including the registration number.                                                                                                             | /                    |
| Eligibility criteria                                  | 6    | Specify characteristics of the sources of evidence used as eligibility criteria (e.g., years considered, language, and publication status), and provide a rationale.                                                                                                                                       | 5                    |
| Information sources*                                  | 7    | Describe all information sources in the search (e.g., databases with dates of coverage and contact with authors to identify additional sources), as well as the date the most recent search was executed.                                                                                                  | 4,5                  |
| Search                                                | 8    | Present the full electronic search strategy for at least 1 database, including any limits used, such that it could be repeated.                                                                                                                                                                            | 3 and 4 + table 1    |
| Selection of sources of evidence†                     | 9    | State the process for selecting sources of evidence (i.e., screening and eligibility) included in the scoping review.                                                                                                                                                                                      | 3 and 4              |
| Data charting process‡                                | 10   | Describe the methods of charting data from the included sources of evidence (e.g., calibrated forms or forms that have been tested by the team before their use, and whether data charting was done independently or in duplicate) and any processes for obtaining and confirming data from investigators. | 5                    |
| Data items                                            | 11   | List and define all variables for which data were sought and any assumptions and simplifications made.                                                                                                                                                                                                     | 3-5                  |
| Critical appraisal of individual sources of evidence§ | 12   | If done, provide a rationale for conducting a critical appraisal of included sources of evidence; describe the methods used and how this information was used in any data synthesis (if appropriate).                                                                                                      | Not required for ScR |

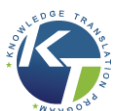

| SECTION                                       | ITEM | PRISMA-ScR CHECKLIST ITEM                                                                                                                                                                       | REPORTED ON PAGE #     |
|-----------------------------------------------|------|-------------------------------------------------------------------------------------------------------------------------------------------------------------------------------------------------|------------------------|
| Synthesis of results                          | 13   | Describe the methods of handling and summarizing the data that were charted.                                                                                                                    | 4, 5                   |
| <b>RESULTS</b>                                |      |                                                                                                                                                                                                 |                        |
| Selection of sources of evidence              | 14   | Give numbers of sources of evidence screened, assessed for eligibility, and included in the review, with reasons for exclusions at each stage, ideally using a flow diagram.                    | 5, 6, and figure 1     |
| Characteristics of sources of evidence        | 15   | For each source of evidence, present characteristics for which data were charted and provide the citations.                                                                                     | 5, table 2             |
| Critical appraisal within sources of evidence | 16   | If done, present data on critical appraisal of included sources of evidence (see item 12).                                                                                                      | /                      |
| Results of individual sources of evidence     | 17   | For each included source of evidence, present the relevant data that were charted that relate to the review questions and objectives.                                                           | 6 – 10 + table 2 and 4 |
| Synthesis of results                          | 18   | Summarize and/or present the charting results as they relate to the review questions and objectives.                                                                                            | 10-13                  |
| <b>DISCUSSION</b>                             |      |                                                                                                                                                                                                 |                        |
| Summary of evidence                           | 19   | Summarize the main results (including an overview of concepts, themes, and types of evidence available), link to the review questions and objectives, and consider the relevance to key groups. | 13 and 14              |
| Limitations                                   | 20   | Discuss the limitations of the scoping review process.                                                                                                                                          | 14 and 15              |
| Conclusions                                   | 21   | Provide a general interpretation of the results with respect to the review questions and objectives, as well as potential implications and/or next steps.                                       | 15                     |
| <b>FUNDING</b>                                |      |                                                                                                                                                                                                 |                        |
| Funding                                       | 22   | Describe sources of funding for the included sources of evidence, as well as sources of funding for the scoping review. Describe the role of the funders of the scoping review.                 | 15                     |

JBI = Joanna Briggs Institute; PRISMA-ScR = Preferred Reporting Items for Systematic reviews and Meta-Analyses extension for Scoping Reviews.

\* Where *sources of evidence* (see second footnote) are compiled from, such as bibliographic databases, social media platforms, and Web sites.

† A more inclusive/heterogeneous term used to account for the different types of evidence or data sources (e.g., quantitative and/or qualitative research, expert opinion, and policy documents) that may be eligible in a scoping review as opposed to only studies. This is not to be confused with *information sources* (see first footnote).

‡ The frameworks by Arksey and O'Malley (6) and Levac and colleagues (7) and the JBI guidance (4, 5) refer to the process of data extraction in a scoping review as data charting.

§ The process of systematically examining research evidence to assess its validity, results, and relevance before using it to inform a decision. This term is used for items 12 and 19 instead of "risk of bias" (which is more applicable to systematic reviews of interventions) to include and acknowledge the various sources of evidence that may be used in a scoping review (e.g., quantitative and/or qualitative research, expert opinion, and policy document).

From: Tricco AC, Lillie E, Zarin W, O'Brien KK, Colquhoun H, Levac D, et al. PRISMA Extension for Scoping Reviews (PRISMA-ScR): Checklist and Explanation. *Ann Intern Med.* 2018;169:467–473. doi: 10.7326/M18-0850.

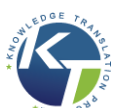

St. Michael's

Inspired Care.  
Inspiring Science.

For peer review only - <http://bmjopen.bmj.com/site/about/guidelines.xhtml>
