# Supplementary material for: Scoping review to identify strategies and interventions improving interprofessional collaboration and integration in primary care
Source: PubMed Central journal article supplement — BMJ Open. 2022 Oct 27;12(10):e062111. doi: 10.1136/bmjopen-2022-062111 (PMC9621161; doi:10.1136/bmjopen-2022-062111), 2022-10-27
Supplement: bmjopen-2022-062111supp001.pdf [file bmjopen-2022-062111supp001.pdf]

## To identify relevant articles we used the following search strategies in PubMed, Web Of Science, and Eric

The search strategy we used in PubMed is included in the manuscript. For the remaining databases, we used the same search strategy, however, since their search engine is designed differently, we found it necessary to include the search strategies as a supplementary file. As mentioned in the article, no websites or grey literature were examined in this review. Additionally, we didn't use any limitations. The manuscripts were approved based on the eligibility criteria.

### 1. PubMed

| MeSH/search terms and combinations for PubMed                                                |
|----------------------------------------------------------------------------------------------|
| 1. primary care                                                                              |
| 2. primary healthcare                                                                        |
| 3. primary health care                                                                       |
| 1 or 2 or 3 (Title/abstract)                                                                 |
| 5. integrative team                                                                          |
| 6. integrative teams                                                                         |
| 7. collaborative practice                                                                    |
| 8. collaborative practices                                                                   |
| 9. interdisciplinary team                                                                    |
| 10. interdisciplinary teams                                                                  |
| 11. multidisciplinary team                                                                   |
| 12. multidisciplinary teams                                                                  |
| 13. interprofessional team                                                                   |
| 14. interprofessional teams                                                                  |
| 15. healthcare team                                                                          |
| 16. healthcare teams                                                                         |
| 17. health care team                                                                         |
| 18. health care teams                                                                        |
| 5 or 6 or 7 or 8 or 9 or 10 or 11 or 12 or 13 or 14 or 15 or 16 or 17 or 18 (title/abstract) |
| 20. interprofessional collaboration                                                          |
| 21. interprofessional teamwork                                                               |
| 22. interprofessional teamwork                                                               |
| 23. interdisciplinary collaboration                                                          |
| 24. interdisciplinary teamwork                                                               |
| 25. interdisciplinary teamwork                                                               |
| 26. multidisciplinary collaboration                                                          |
| 20 or 21 or 22 or 23 or 24 or 25 or 26 (All fields)                                          |
| 4 AND 19 AND 27                                                                              |

Table 1: keywords and MeSH terms used to identify relevant data.

## 2. Web Of Science

In the Web Of Science search engine, it was not possible to search for title/abstract simultaneously. Thus, we searched for them separately as illustrated below.

Queries:

(TI=(primary care OR primary health care OR primary health care)) AND AB=(primary care OR primary health care OR primary health care)

### AND

(TI=((integrative team OR integrative teams OR collaborative practice OR collaborative practices OR interdisciplinary team OR interdisciplinary teams OR multidisciplinary team OR multidisciplinary teams OR interprofessional team OR interprofessional teams OR health care team OR health care teams OR health care team OR health care teams))) AND AB((((integrative team OR integrative teams OR collaborative practice OR collaborative practices OR interdisciplinary team OR interdisciplinary teams OR multidisciplinary team OR multidisciplinary teams OR interprofessional team OR interprofessional teams OR health care team OR health care teams OR health care team OR health care teams)))

### AND

ALL=(interprofessional collaboration OR interprofessional teamwork OR interprofessional teamwork OR interdisciplinary collaboration OR interdisciplinary teamwork OR interdisciplinary teamwork OR multidisciplinary collaboration)

| MeSH/search terms and combinations for PubMed |
|-----------------------------------------------|
| 1. primary care                               |
| 2. primary health care                        |
| 3. primary healthcare                         |
| 4 = 1 or 2 or 3 (Title)                       |
| 5. primary care                               |
| 6. primary health care                        |
| 7. primary healthcare                         |
| 8 = 5 or 6 or 7 (Abstract)                    |
| 9. integrative team                           |
| 10. integrative teams                         |
| 11. collaborative practice                    |
| 12. collaborative practices                   |
| 13. interdisciplinary team                    |
| 14. interdisciplinary teams                   |
| 15. multidisciplinary team                    |
| 16. multidisciplinary teams                   |
| 17. interprofessional team                    |
| 18. interprofessional teams                   |
| 19. health care team                          |
| 20. health care teams                         |
| 21. healthcare team                           |

|                                                                                                  |
|--------------------------------------------------------------------------------------------------|
| 22. healthcare teams                                                                             |
| 23 = 9 or 10 or 11 or 12 or 13 or 14 or 15 or 16 or 17 or 18 or 19 or 20 or 21 or 22 (Title)     |
| 24. integrative team                                                                             |
| 25. integrative teams                                                                            |
| 26. collaborative practice                                                                       |
| 27. collaborative practices                                                                      |
| 28. interdisciplinary team                                                                       |
| 29. interdisciplinary teams                                                                      |
| 30. multidisciplinary team                                                                       |
| 31. multidisciplinary teams                                                                      |
| 32. interprofessional team                                                                       |
| 33. interprofessional teams                                                                      |
| 34. health care team                                                                             |
| 35. health care teams                                                                            |
| 36. healthcare team                                                                              |
| 37. healthcare teams                                                                             |
| 38 = 24 or 25 or 26 or 27 or 28 or 29 or 30 or 31 or 32 or 33 or 34 or 35 or 36 or 37 (Abstract) |
| 39. interprofessional collaboration                                                              |
| 40. interprofessional teamwork                                                                   |
| 41. interprofessional teamwork                                                                   |
| 42. interdisciplinary collaboration                                                              |
| 43. interdisciplinary teamwork                                                                   |
| 44. interdisciplinary teamwork                                                                   |
| 45. multidisciplinary collaboration                                                              |
| 46 = 39 or 40 or 41 or 42 or 43 or 44 or 45 (All fields)                                         |
| 47 = 4 AND 8 AND 23 AND 38 AND 46                                                                |

Table 2: keywords and MeSH terms used to identify relevant data in Web Of Science.

### 3. ERIC

(TI=(primary care OR primary health care OR primary health care)) AND AB=(primary care OR primary health care OR primary health care)

#### **AND**

(TI=((integrative team OR integrative teams OR collaborative practice OR collaborative practices OR interdisciplinary team OR interdisciplinary teams OR multidisciplinary team OR multidisciplinary teams OR interprofessional team OR interprofessional teams OR health care team OR health care teams OR health care team OR health care teams))) AND AB=((integrative team OR integrative teams OR collaborative practice OR collaborative practices OR interdisciplinary team OR interdisciplinary teams OR multidisciplinary team OR multidisciplinary teams OR interprofessional team OR interprofessional teams OR health care team OR health care teams OR health care team OR health care teams)))

#### **AND**

TX=(interprofessional collaboration OR interprofessional teamwork OR interprofessional teamwork OR interdisciplinary collaboration OR interdisciplinary teamwork OR interdisciplinary teamwork OR multidisciplinary collaboration)

| MeSH/search terms and combinations for PubMed                                                    |
|--------------------------------------------------------------------------------------------------|
| 1. primary care                                                                                  |
| 2. primary healthcare                                                                            |
| 3. primary health care                                                                           |
| 4 = 1 or 2 or 3 (Title)                                                                          |
| 5. primary care                                                                                  |
| 6. primary healthcare                                                                            |
| 7. primary health care                                                                           |
| 8 = 5 or 6 or 7 (Abstract)                                                                       |
| 9. integrative team                                                                              |
| 10. integrative teams                                                                            |
| 11. collaborative practice                                                                       |
| 12. collaborative practices                                                                      |
| 13. interdisciplinary team                                                                       |
| 14. interdisciplinary teams                                                                      |
| 15. multidisciplinary team                                                                       |
| 16. multidisciplinary teams                                                                      |
| 17. interprofessional team                                                                       |
| 18. interprofessional teams                                                                      |
| 19. healthcare team                                                                              |
| 20. healthcare teams                                                                             |
| 21. health care team                                                                             |
| 22. health care teams                                                                            |
| 23 = 9 or 10 or 11 or 12 or 13 or 14 or 15 or 16 or 17 or 18 or 19 or 20 or 21 or 22 (Title)     |
| 24. integrative team                                                                             |
| 25. integrative teams                                                                            |
| 26. collaborative practice                                                                       |
| 27. collaborative practices                                                                      |
| 28. interdisciplinary team                                                                       |
| 29. interdisciplinary teams                                                                      |
| 30. multidisciplinary team                                                                       |
| 31. multidisciplinary teams                                                                      |
| 32. interprofessional team                                                                       |
| 33. interprofessional teams                                                                      |
| 34. healthcare team                                                                              |
| 35. healthcare teams                                                                             |
| 36. health care team                                                                             |
| 37. health care teams                                                                            |
| 38 = 24 or 25 or 26 or 27 or 28 or 29 or 30 or 31 or 32 or 33 or 34 or 35 or 36 or 37 (Abstract) |
| 39. interprofessional collaboration                                                              |
| 40. interprofessional teamwork                                                                   |
| 41. interprofessional teamwork                                                                   |
| 42. interdisciplinary collaboration                                                              |
| 43. interdisciplinary teamwork                                                                   |

|                                                        |
|--------------------------------------------------------|
| 44. interdisciplinary teamwork                         |
| 45. multidisciplinary collaboration                    |
| 46 = 39 or 40 or 41 or 42 or 43 or 44 or 45 (All text) |
| 47 = 4 AND 8 AND 23 AND 38 AND 46                      |

Table 3: keywords and MeSH terms used to identify relevant data in ERIC.
